# Supplementary material for: Training and Validation of Deep Learning-Based Auto-Segmentation Models for Lung Stereotactic Ablative Radiotherapy Using Retrospective Radiotherapy Planning Contours
Source: PubMed Central journal article supplement (PMC8215371; doi:10.3389/fonc.2021.626499), 2021-06-07
Supplement: DataSheet_1.pdf [file DataSheet_1.pdf]

# Example Case 1

Auto-segmentation = Blue

Manual clinical contour = Purple

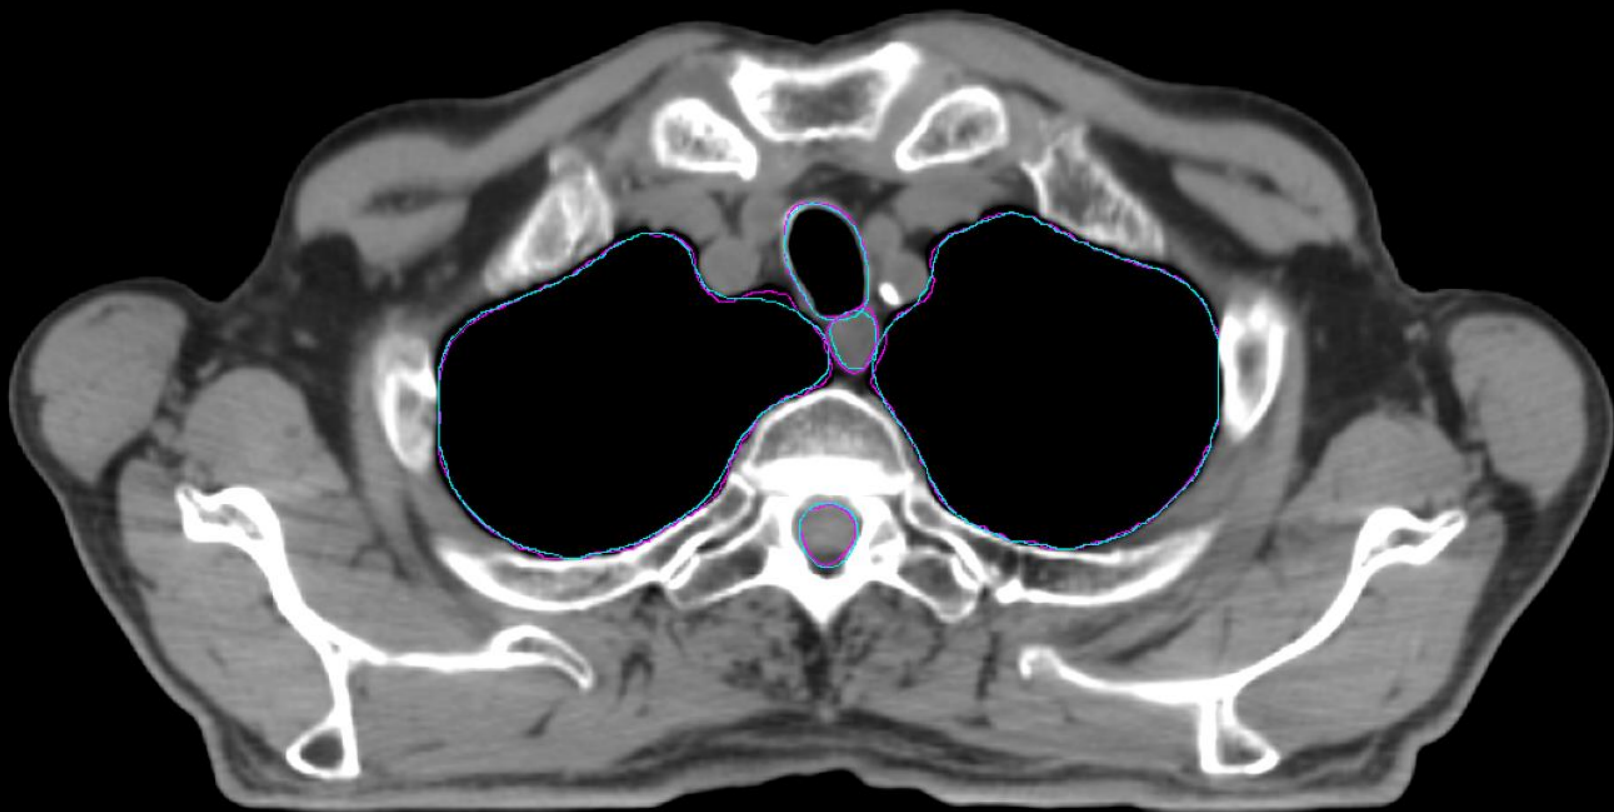

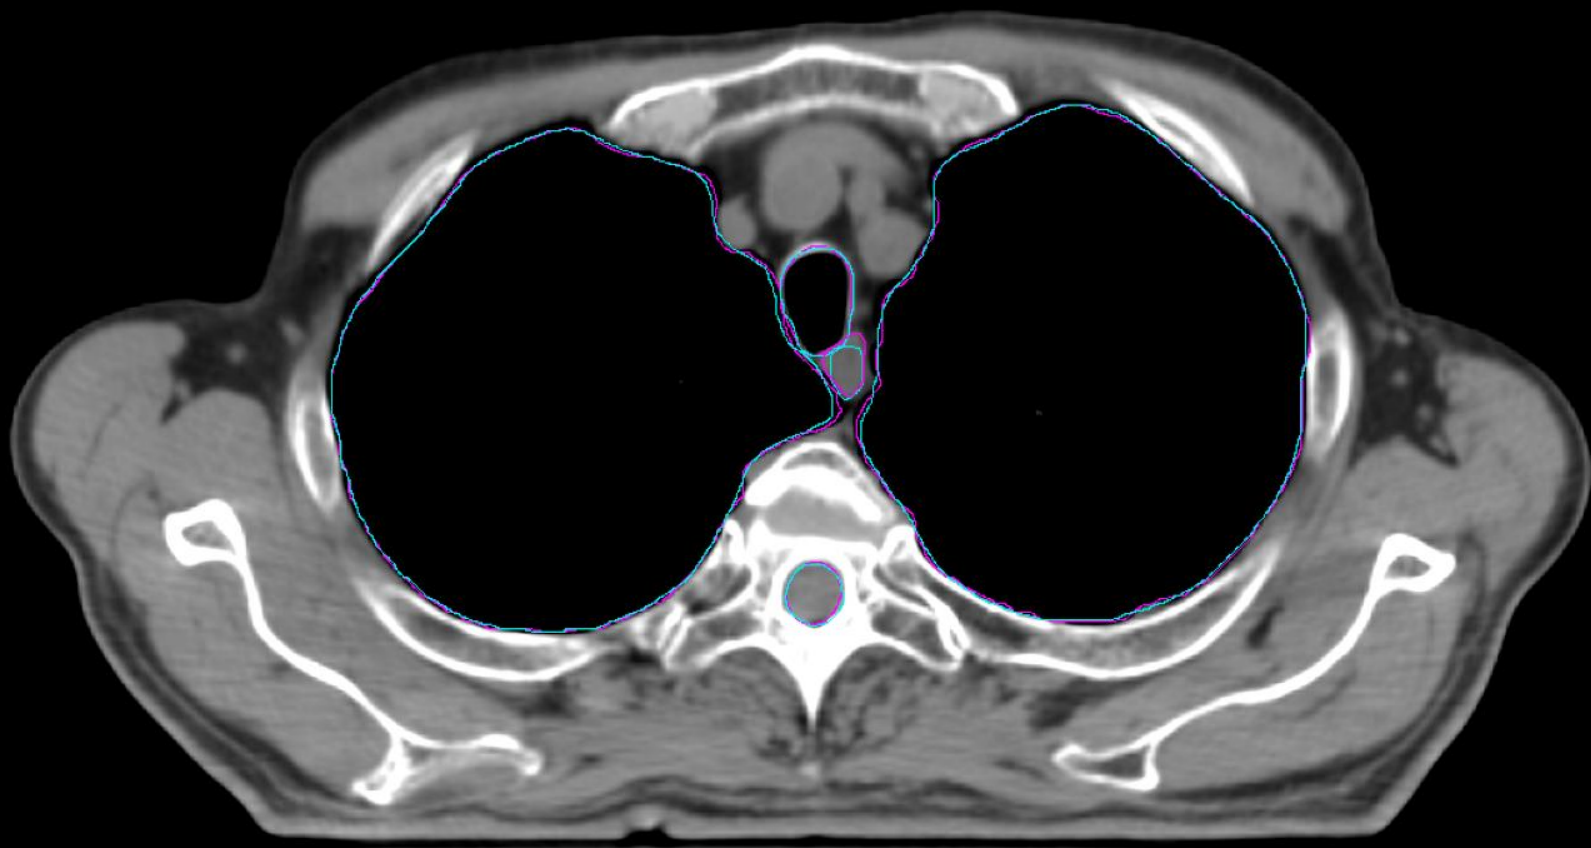

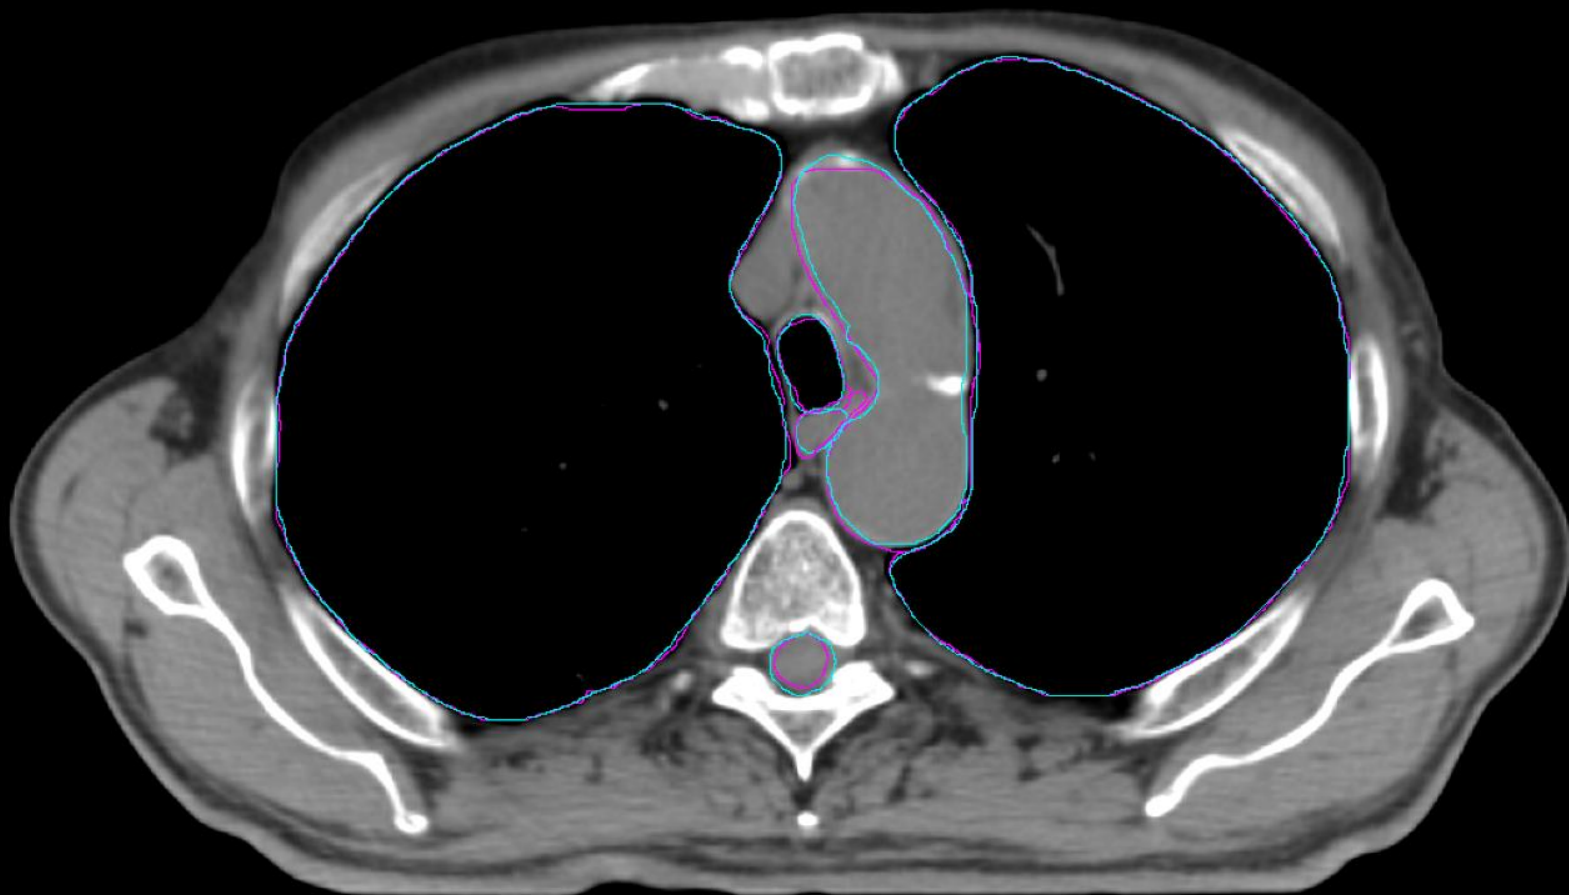

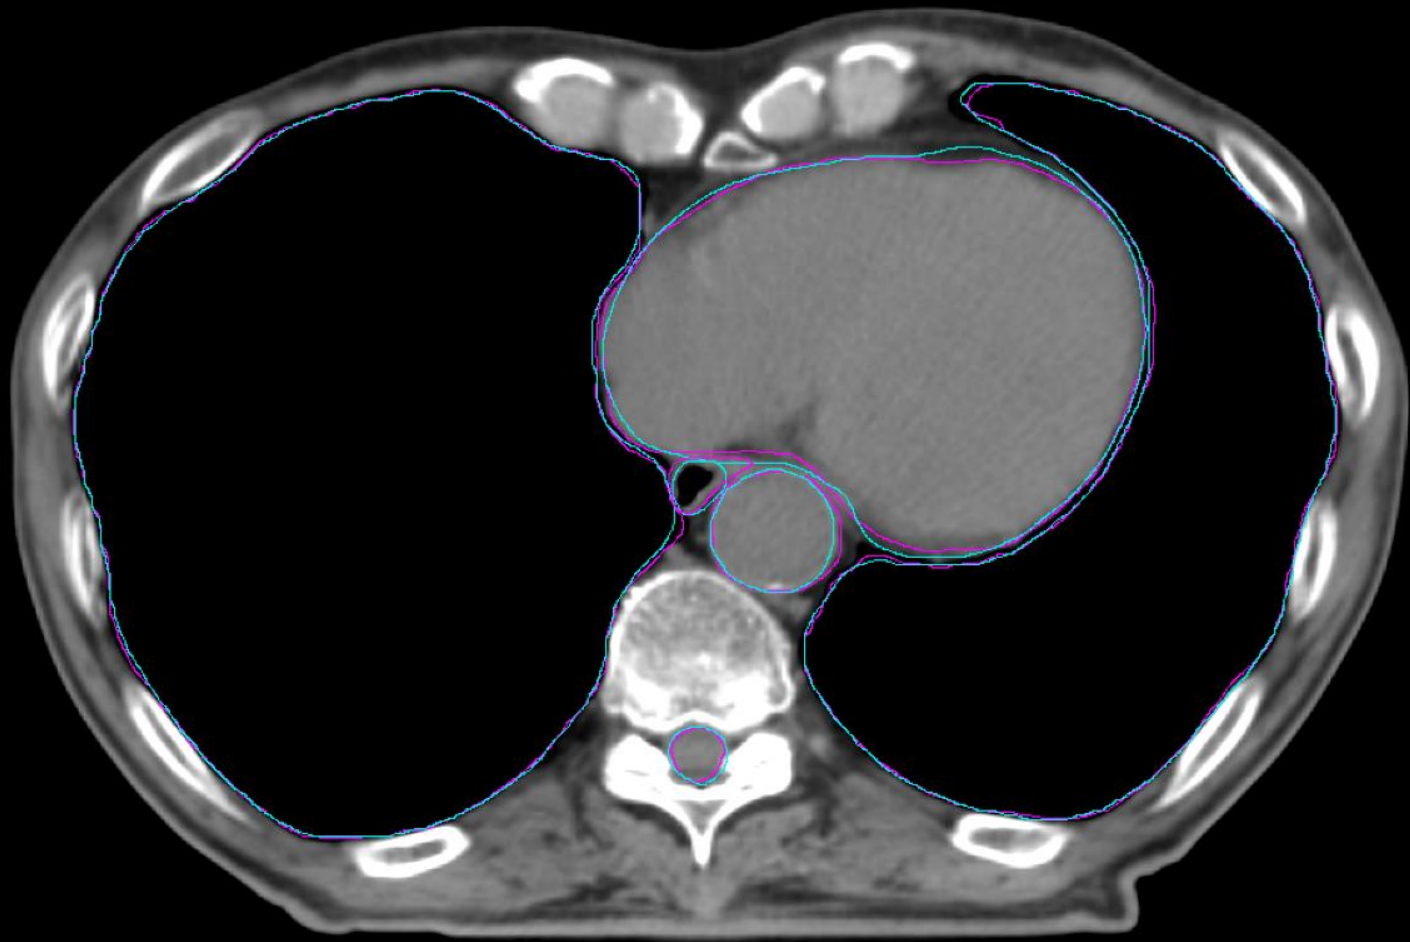

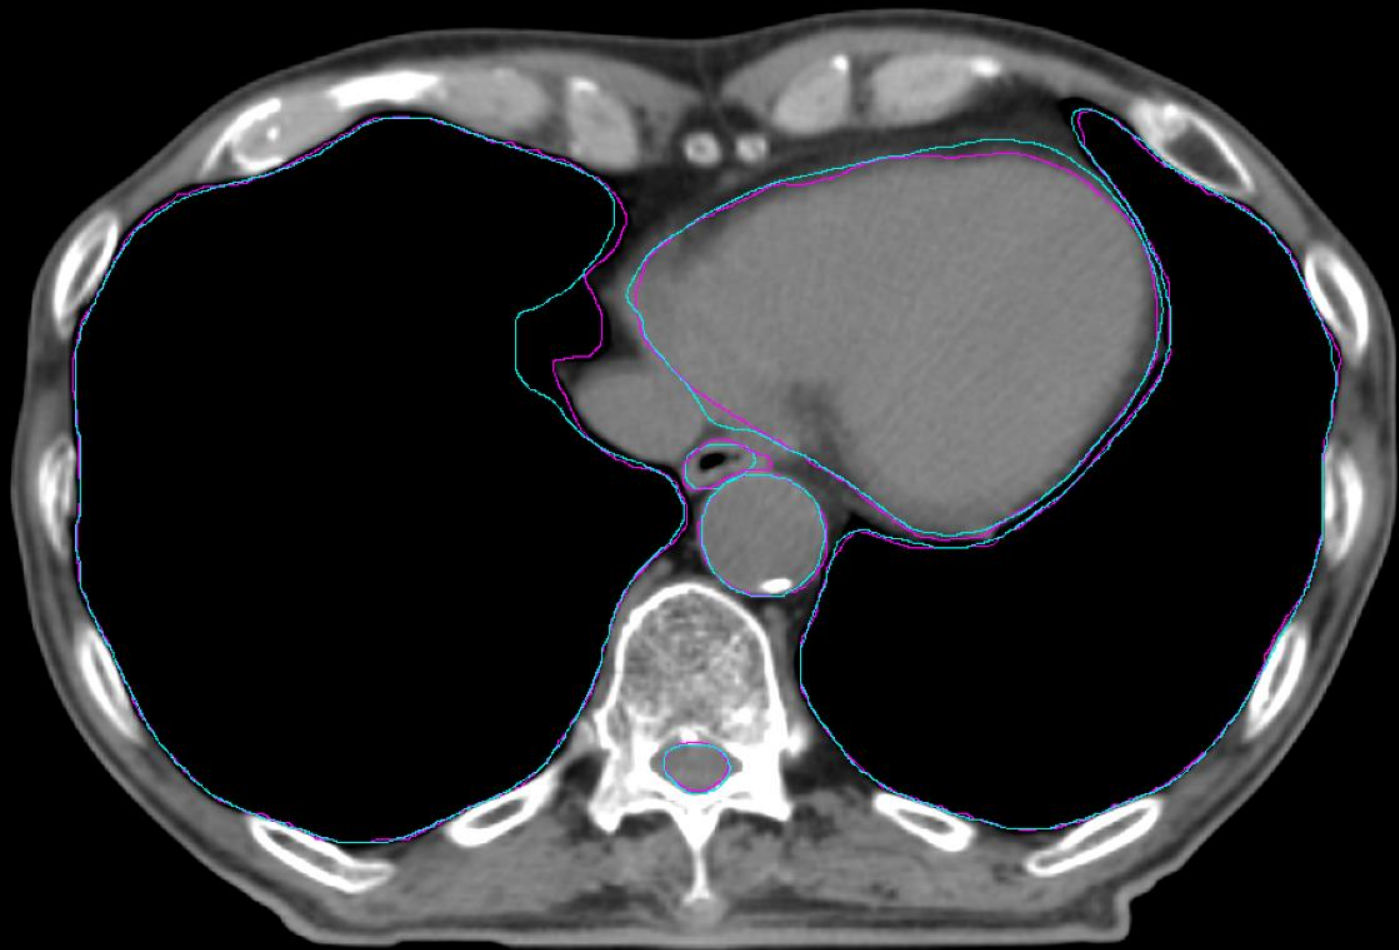

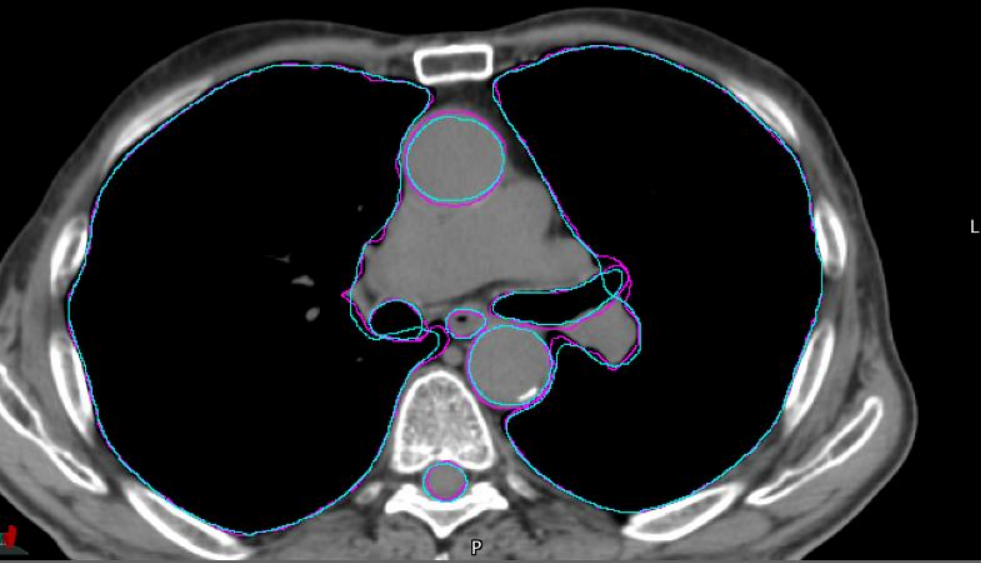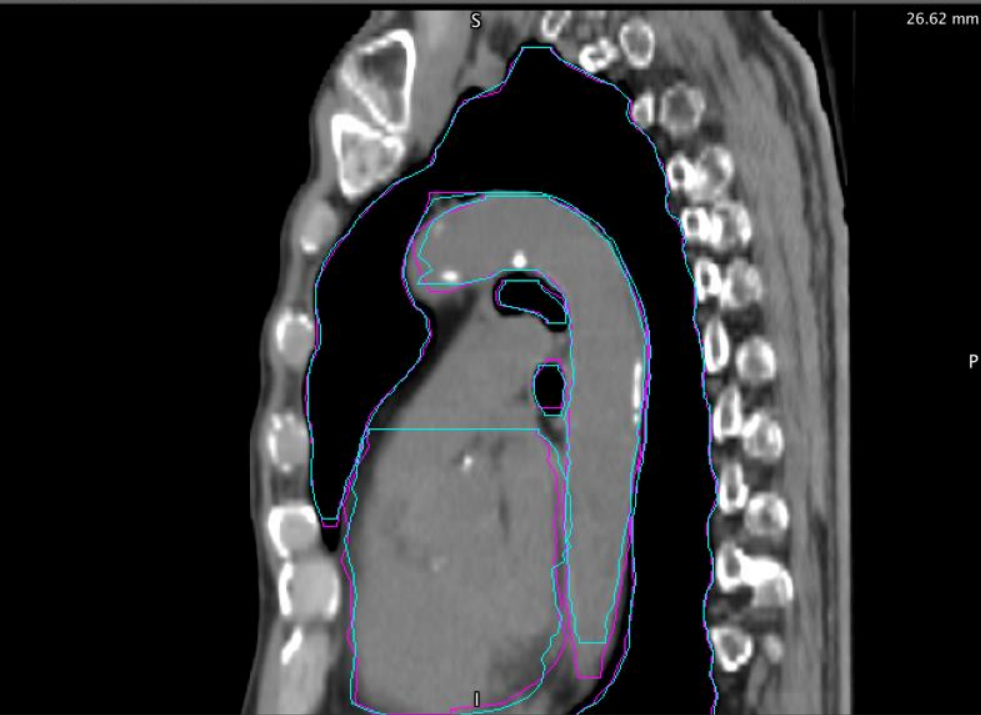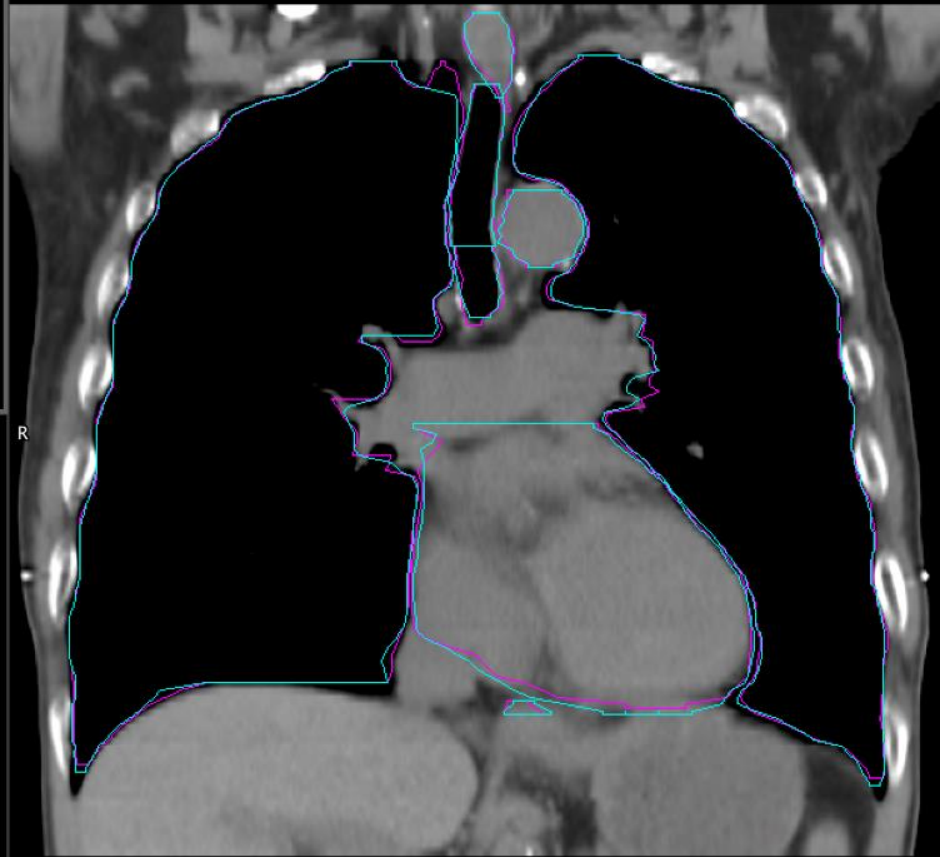

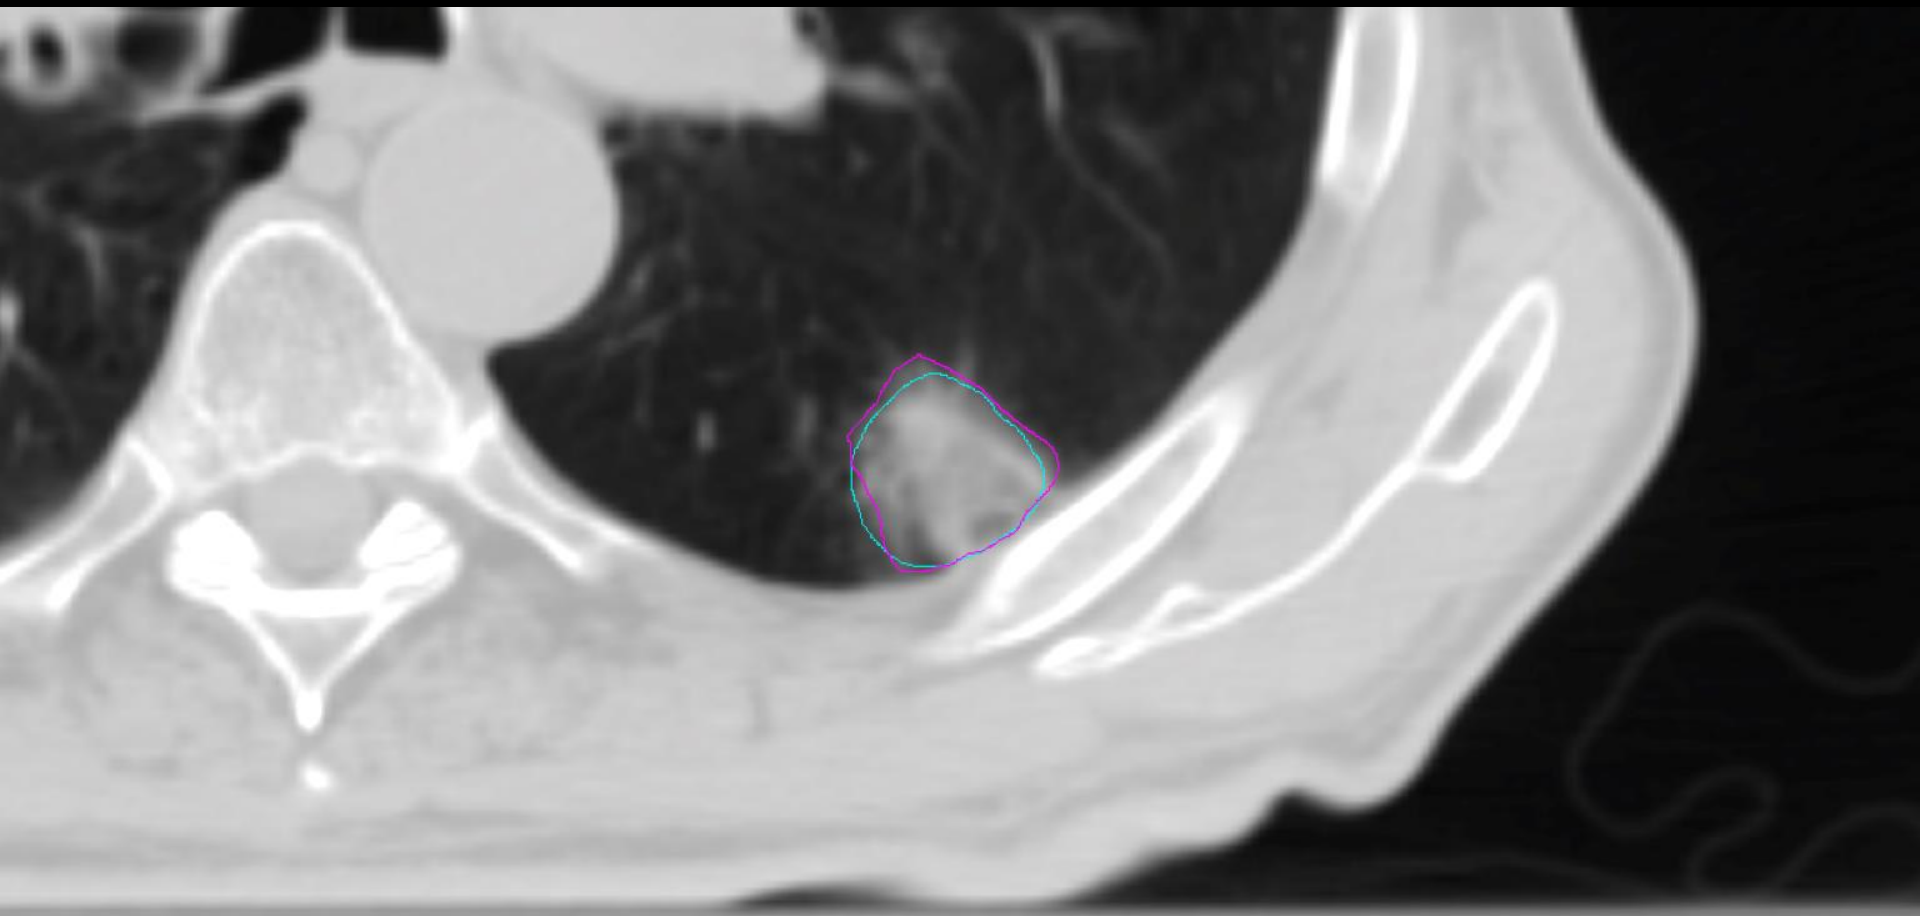



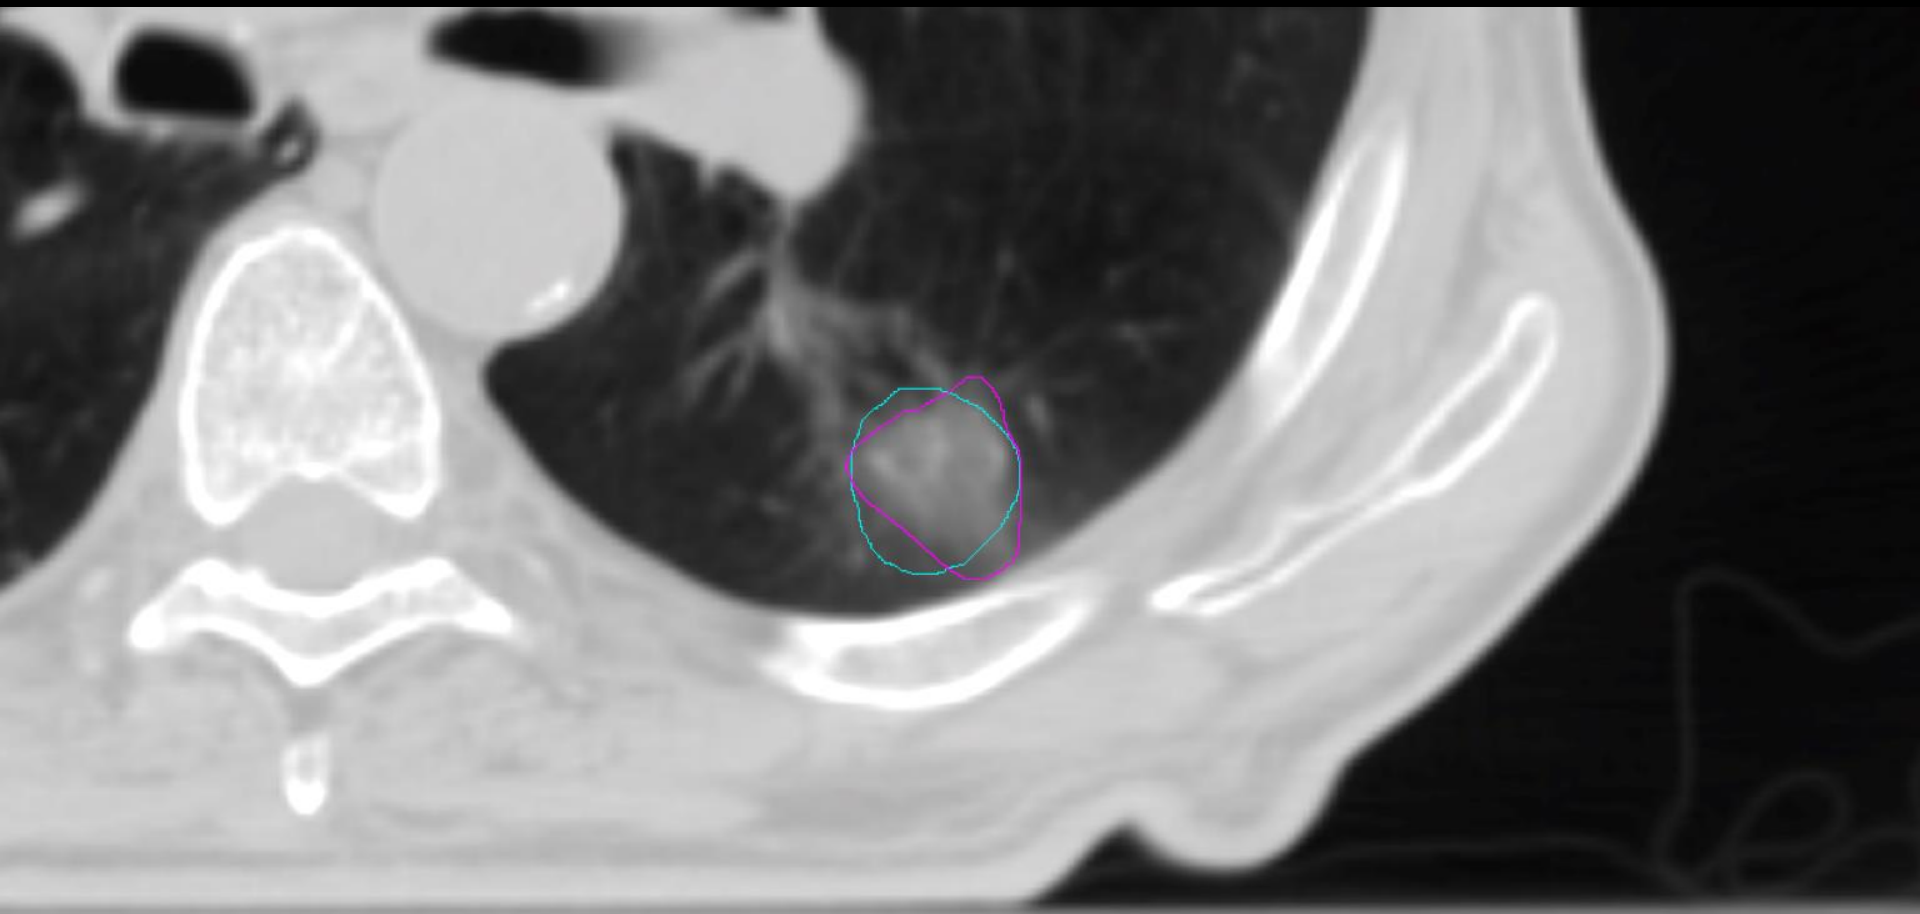

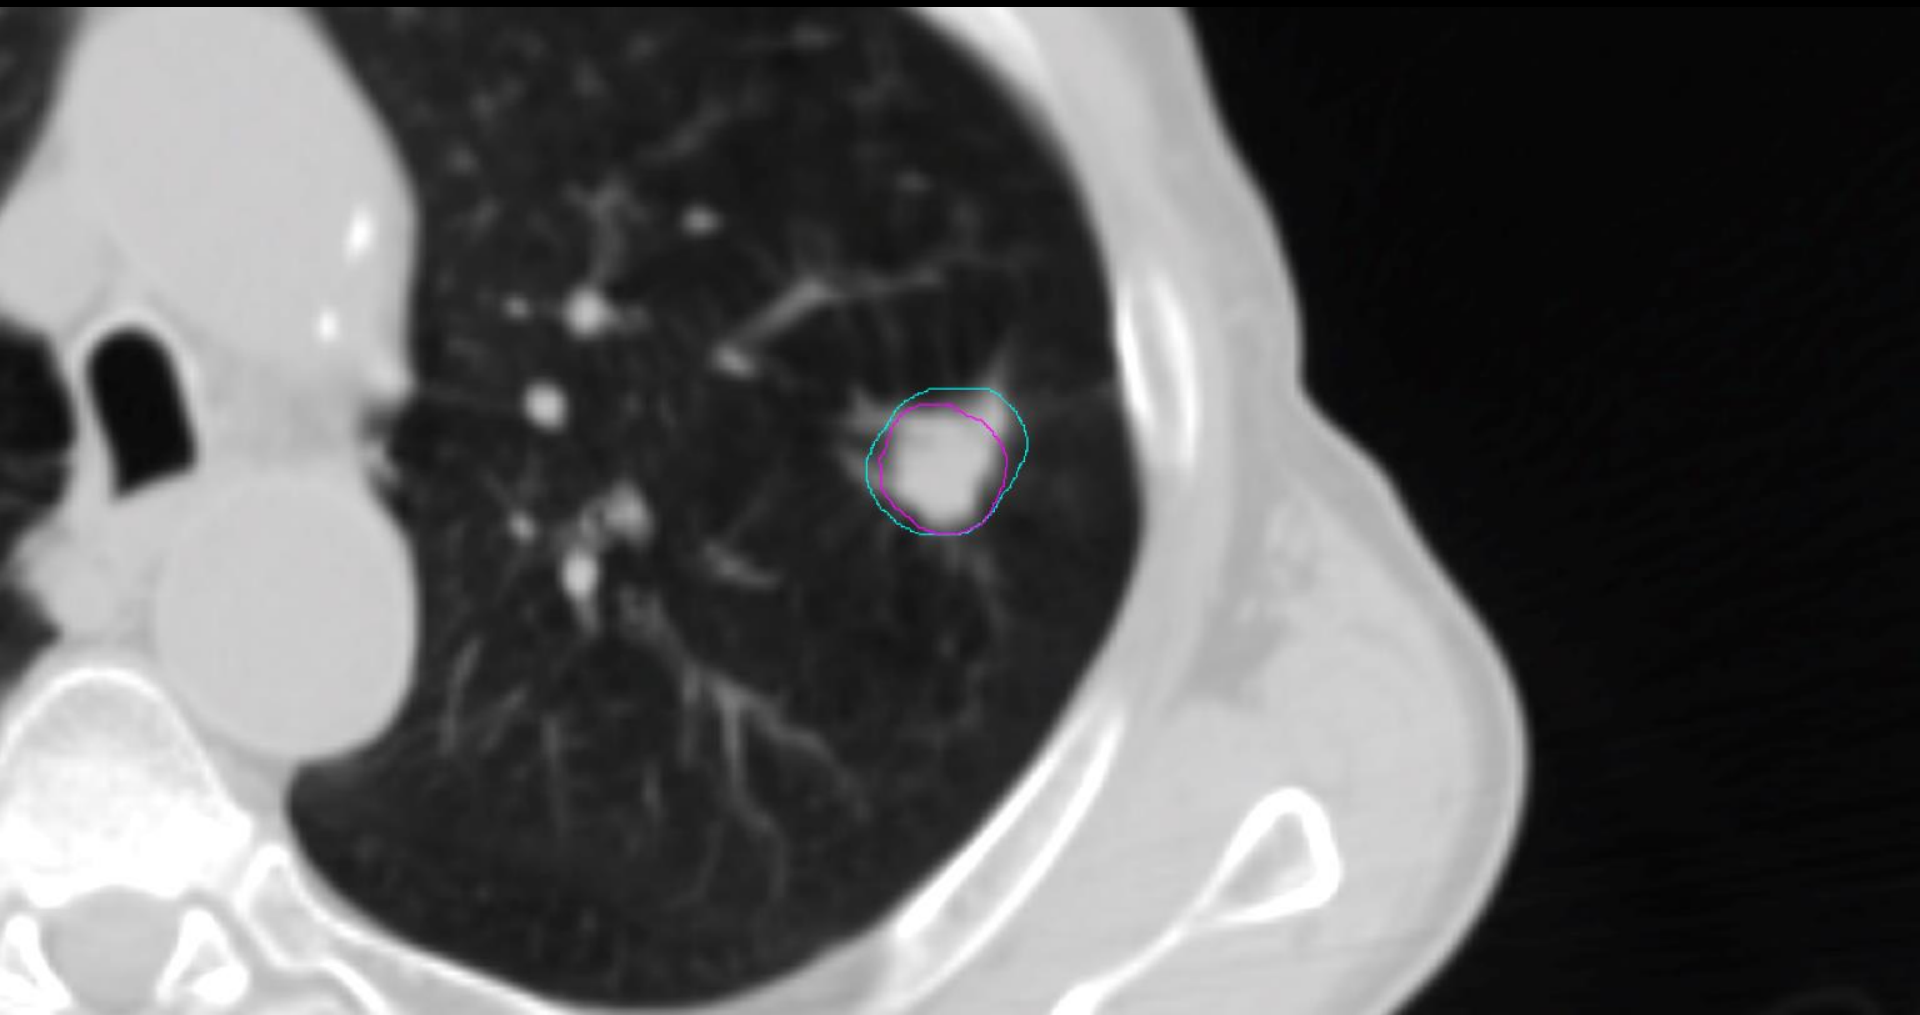

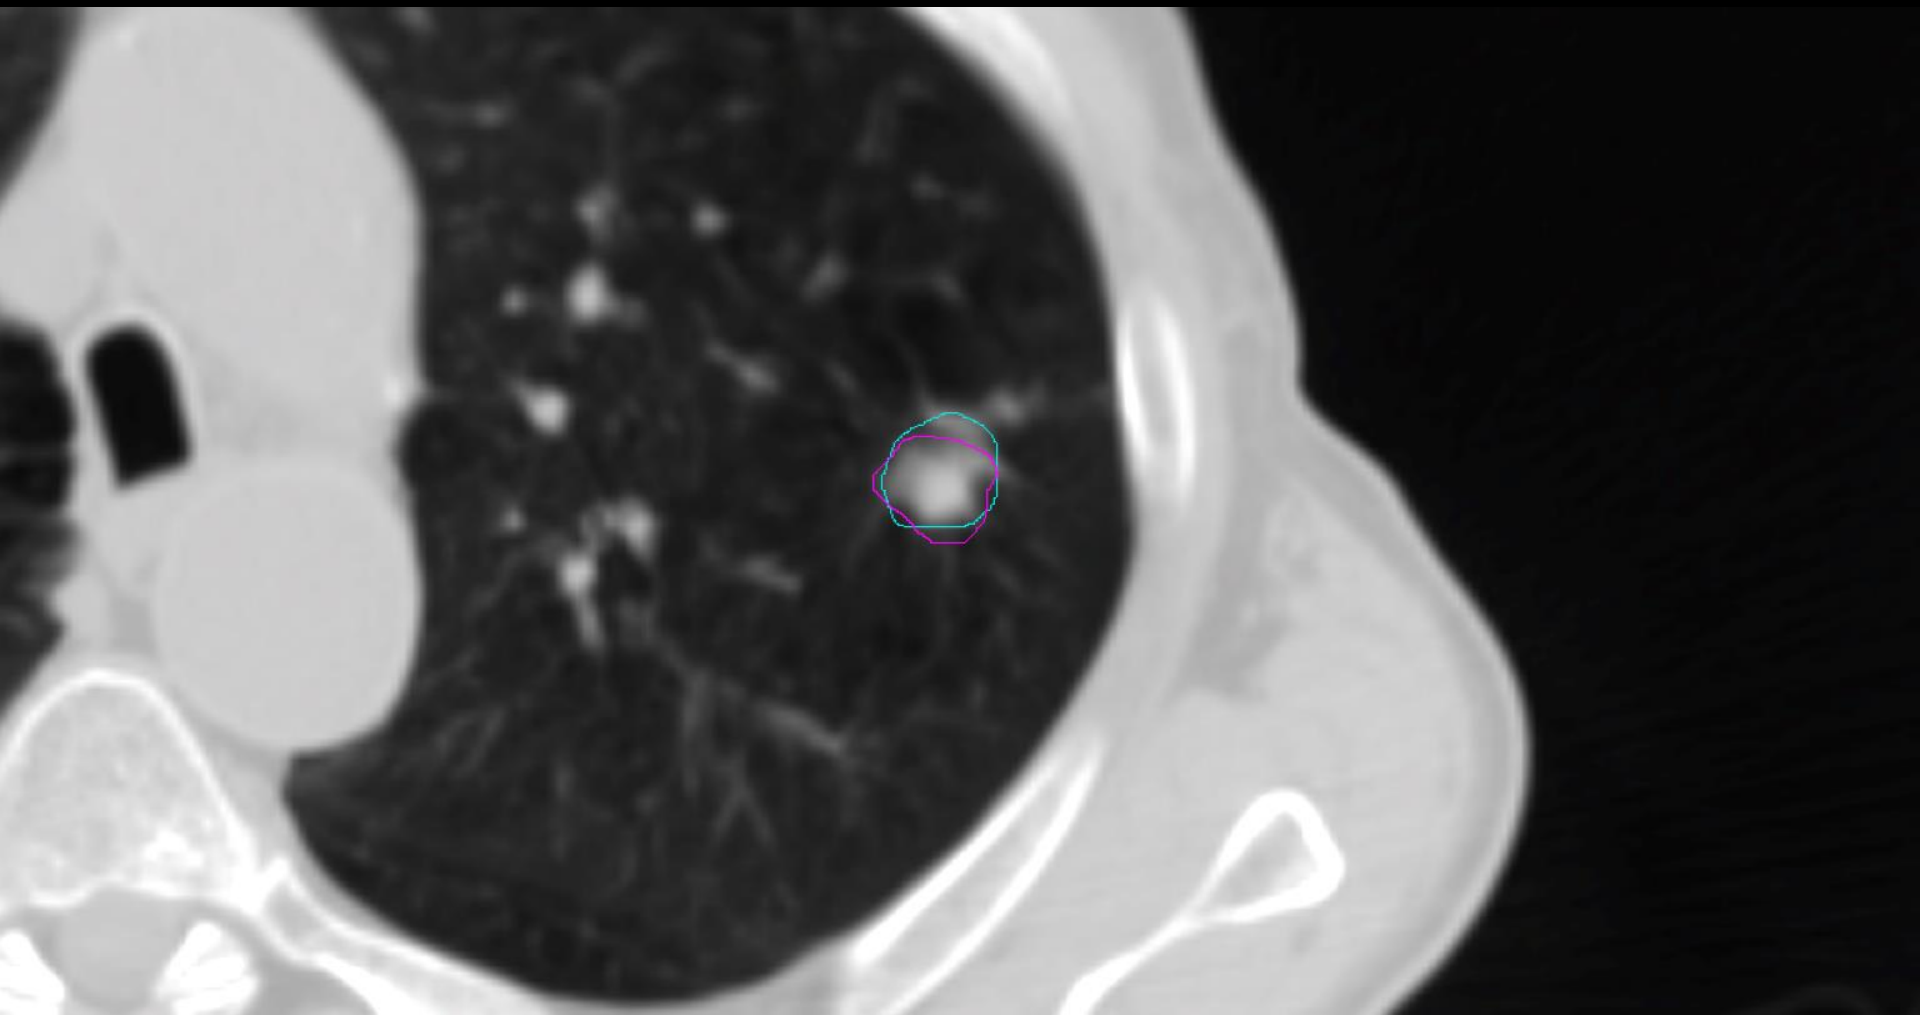

IP(10) 0%\_10%\_20%\_30%\_40%\_50%\_60%\_70%\_80%\_90%  
DN77361  
7-06-30 14:56 PM

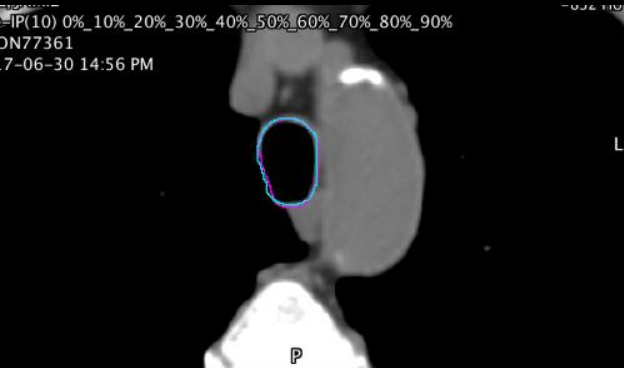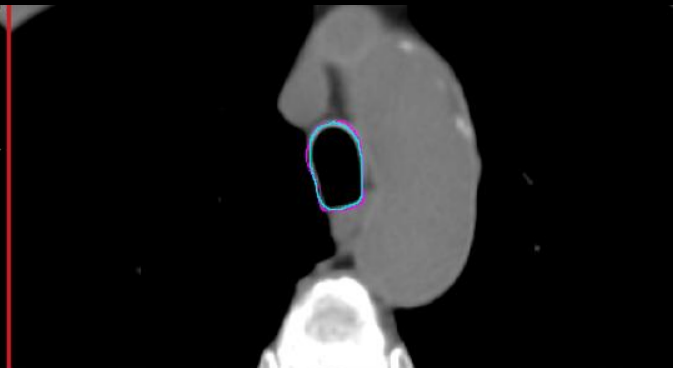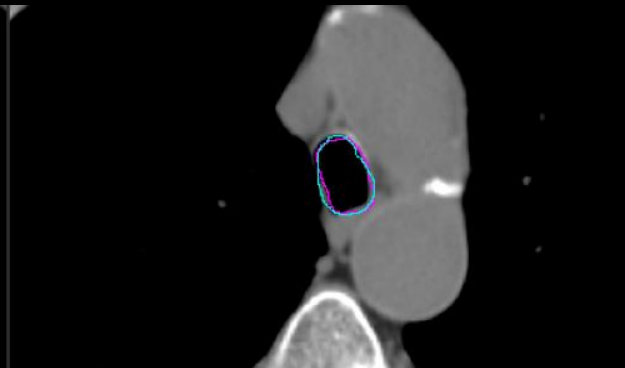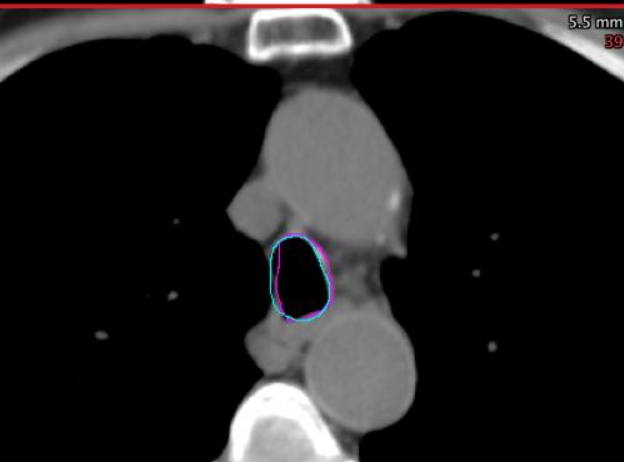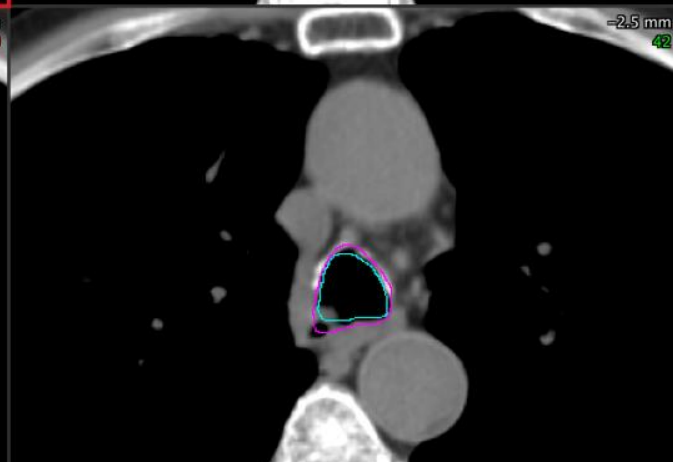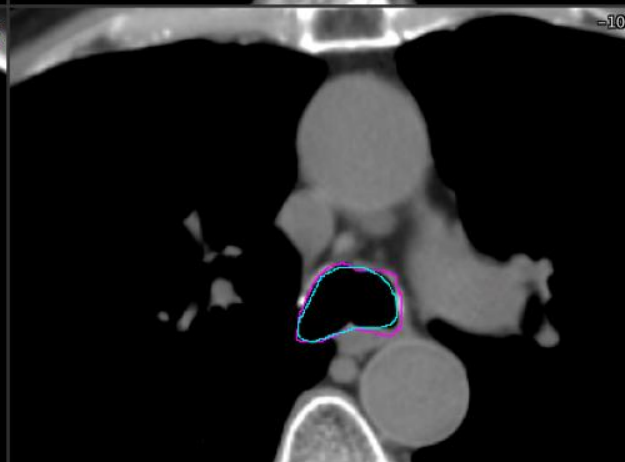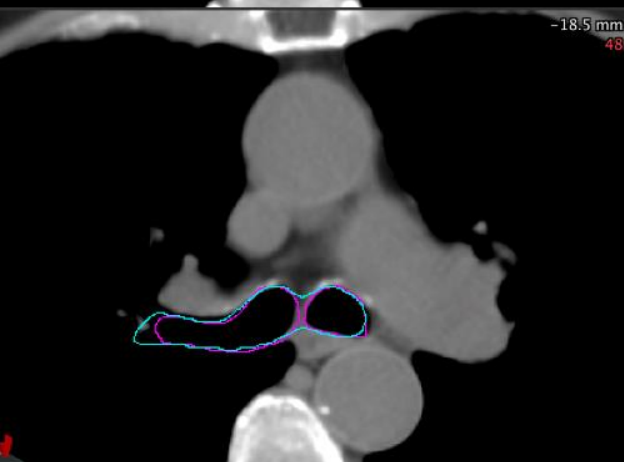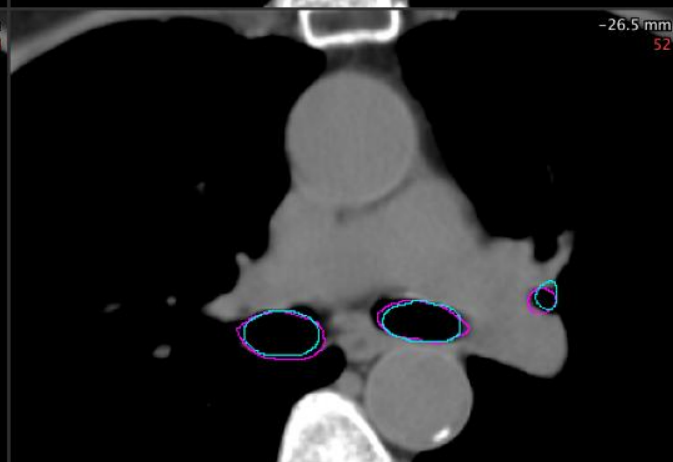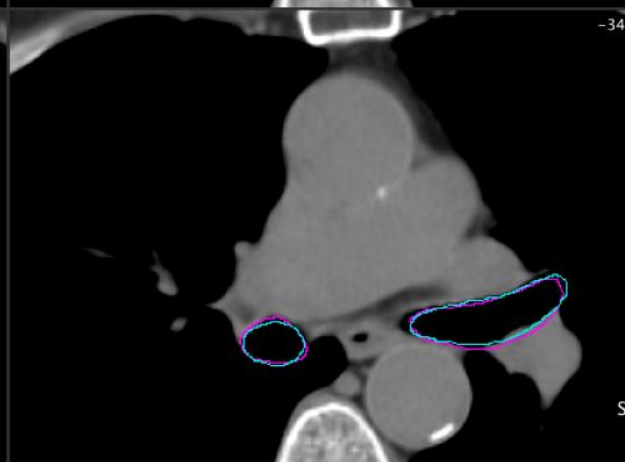

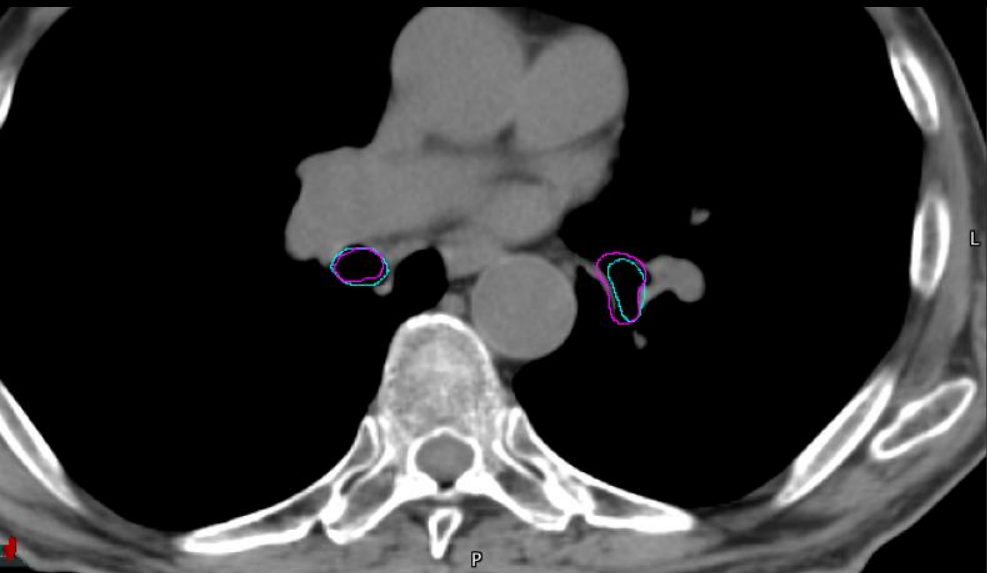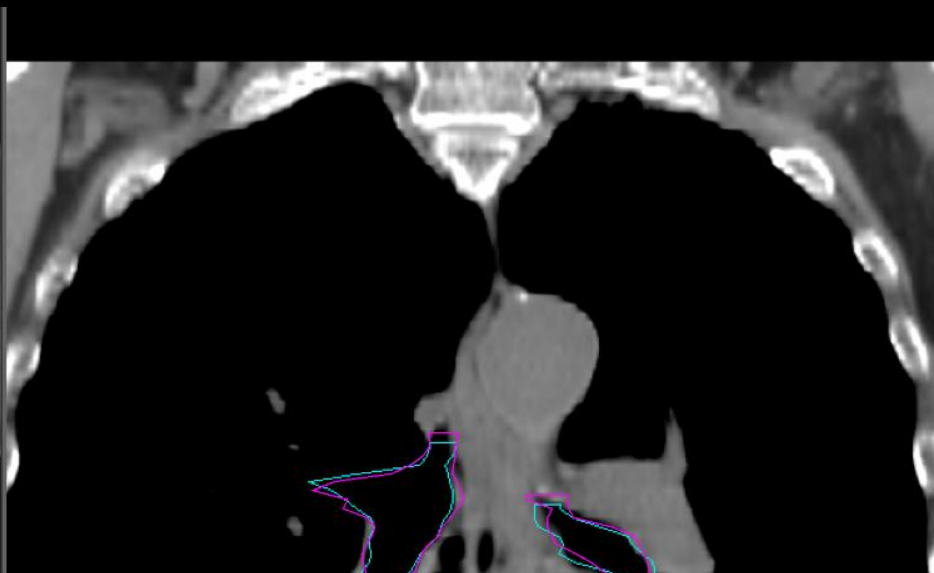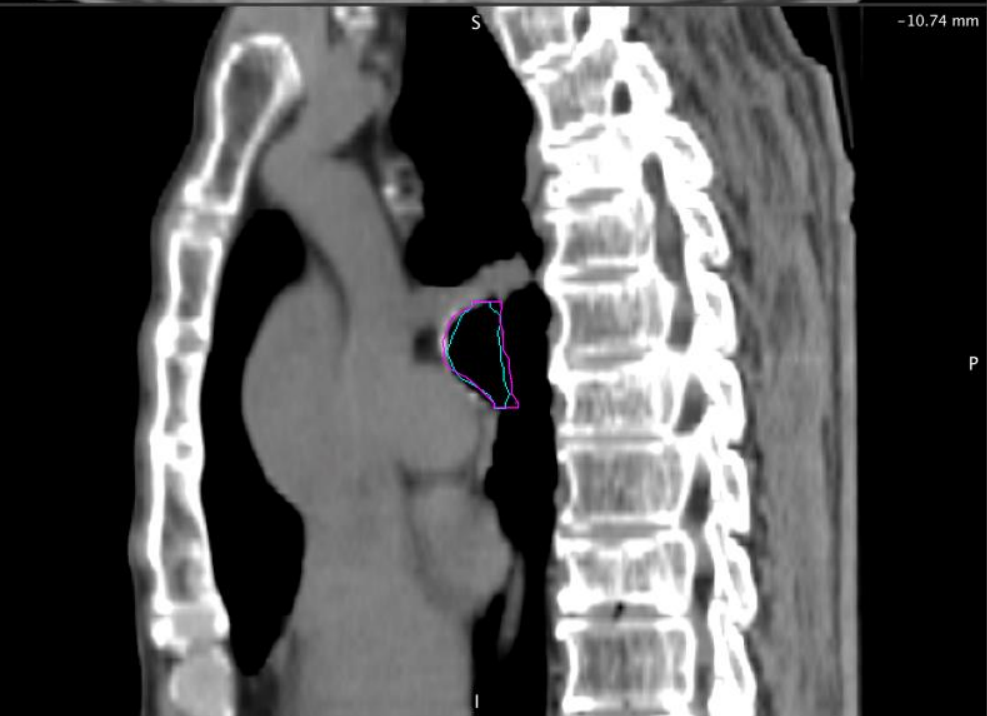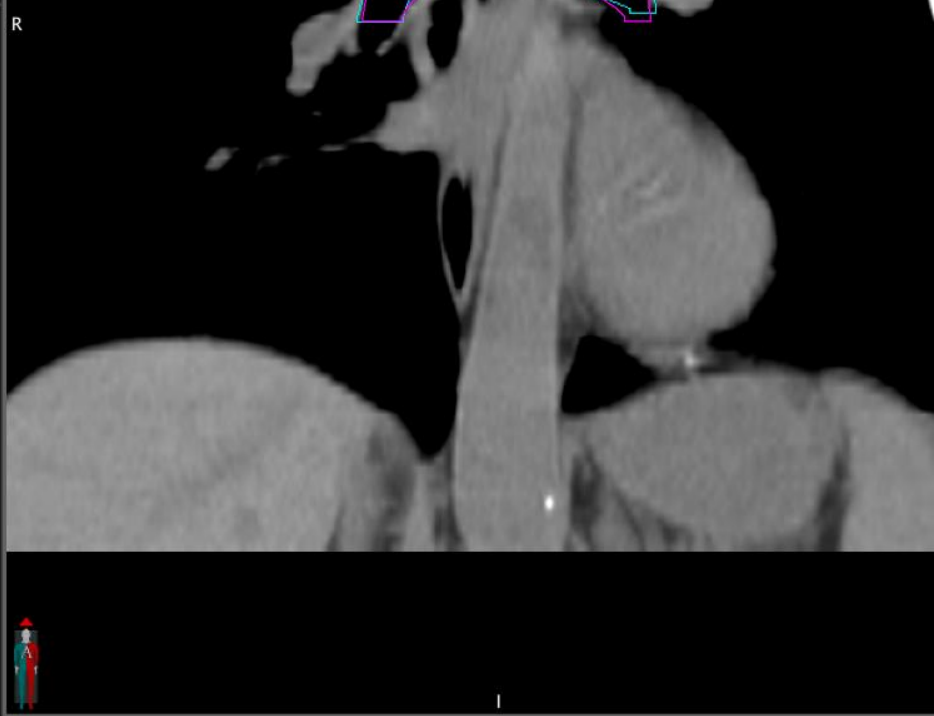

# Example Case 2

Auto-segmentation = Blue

Manual clinical contour = Purple

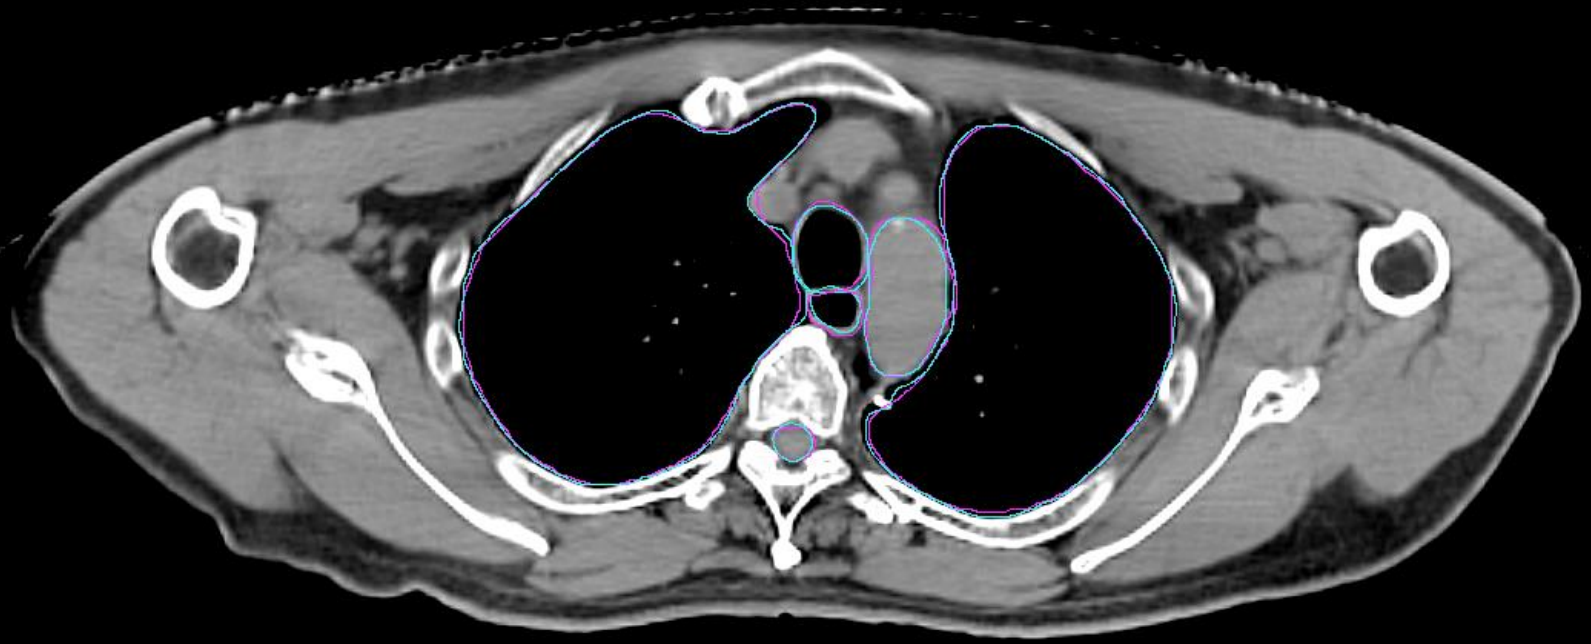

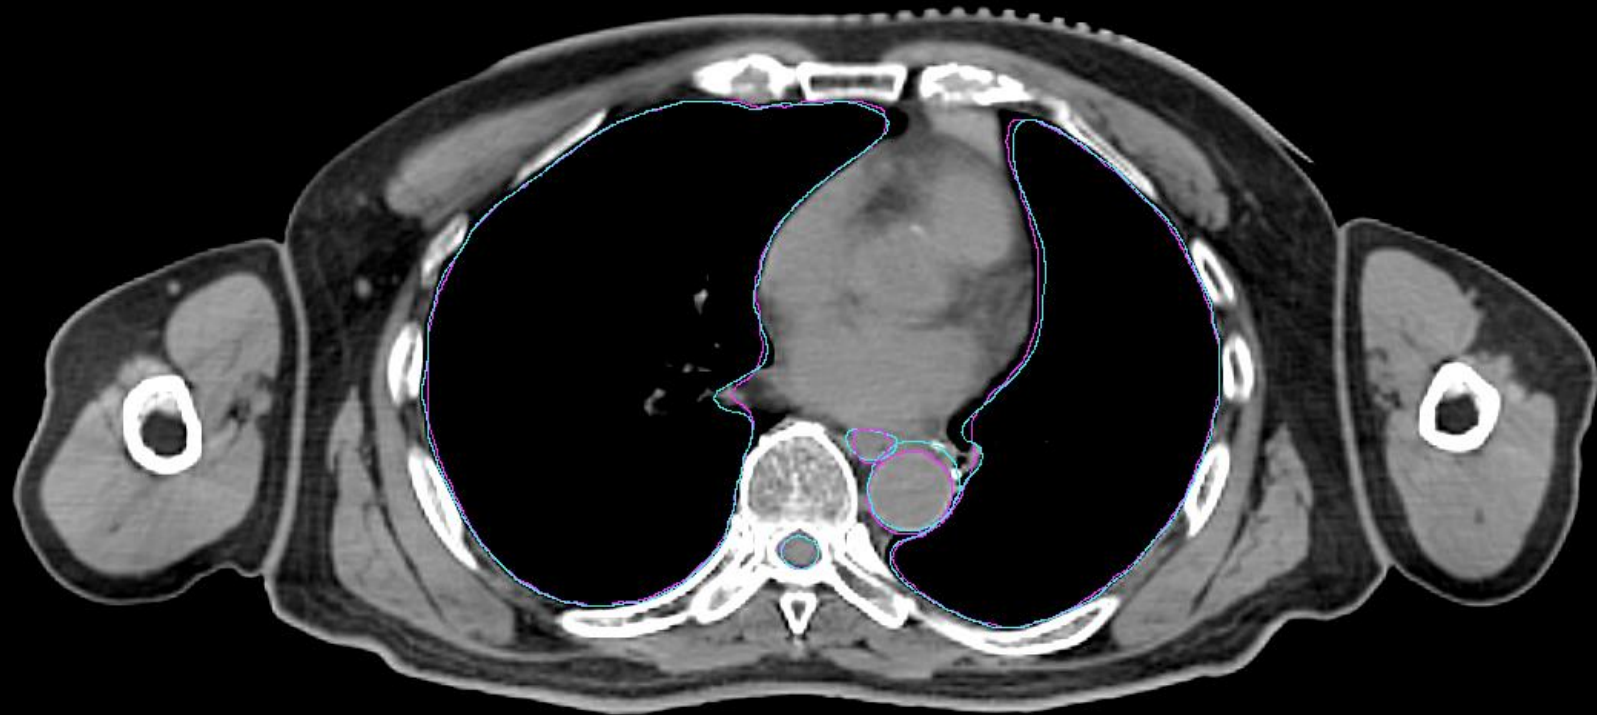



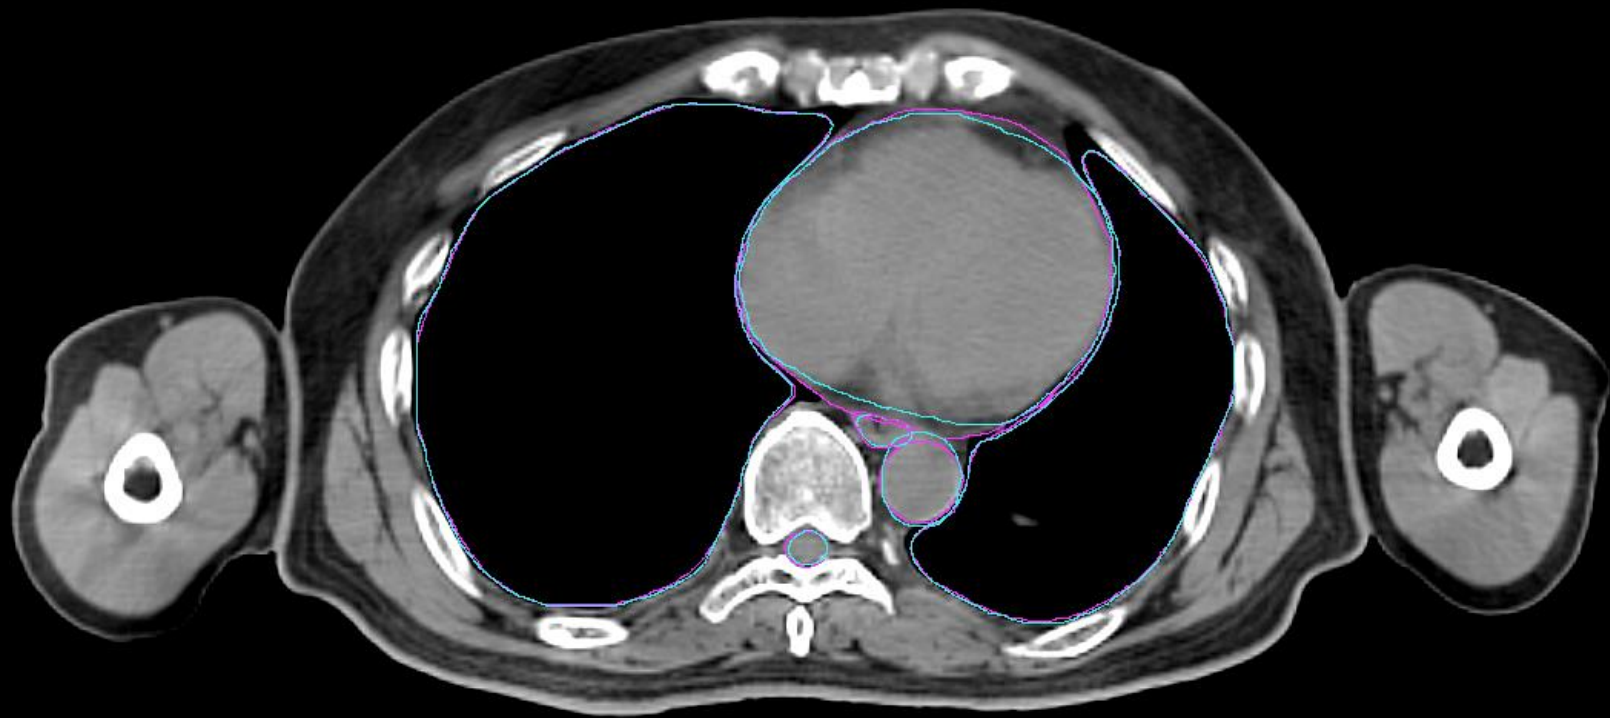

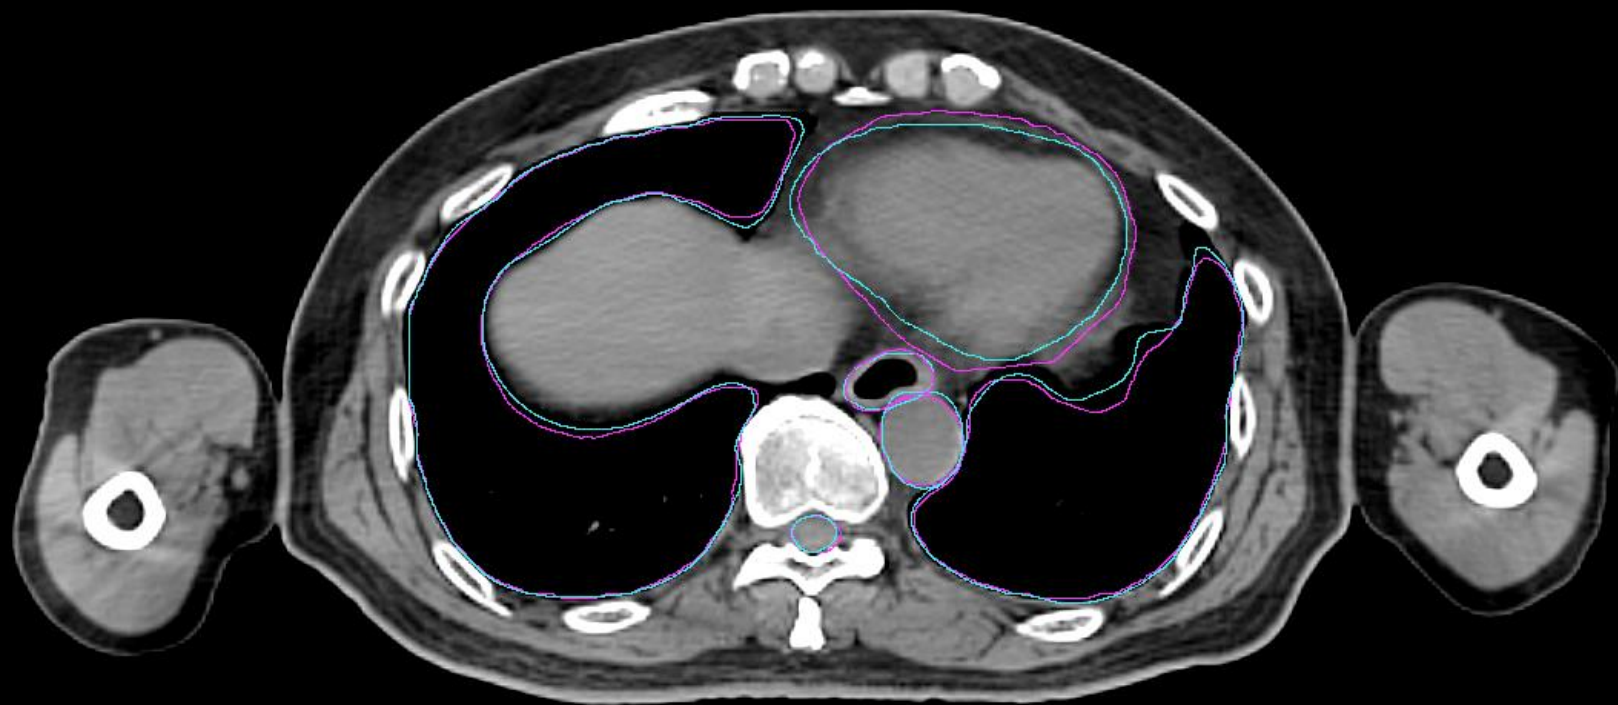

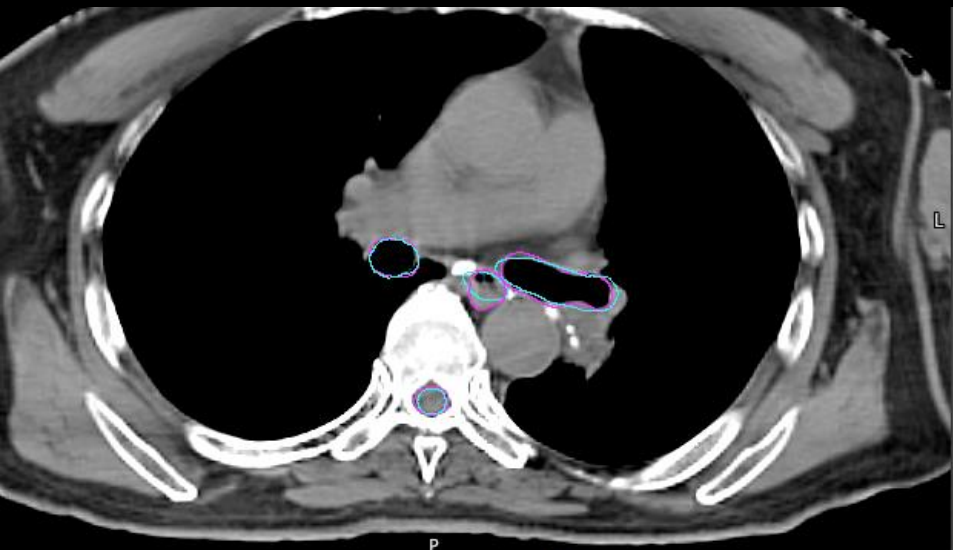

P

S

23.17 mm

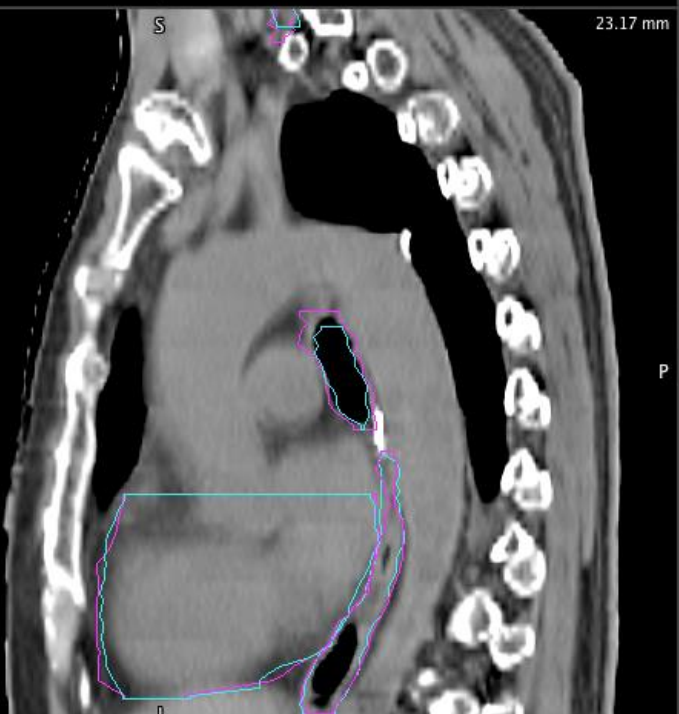

P

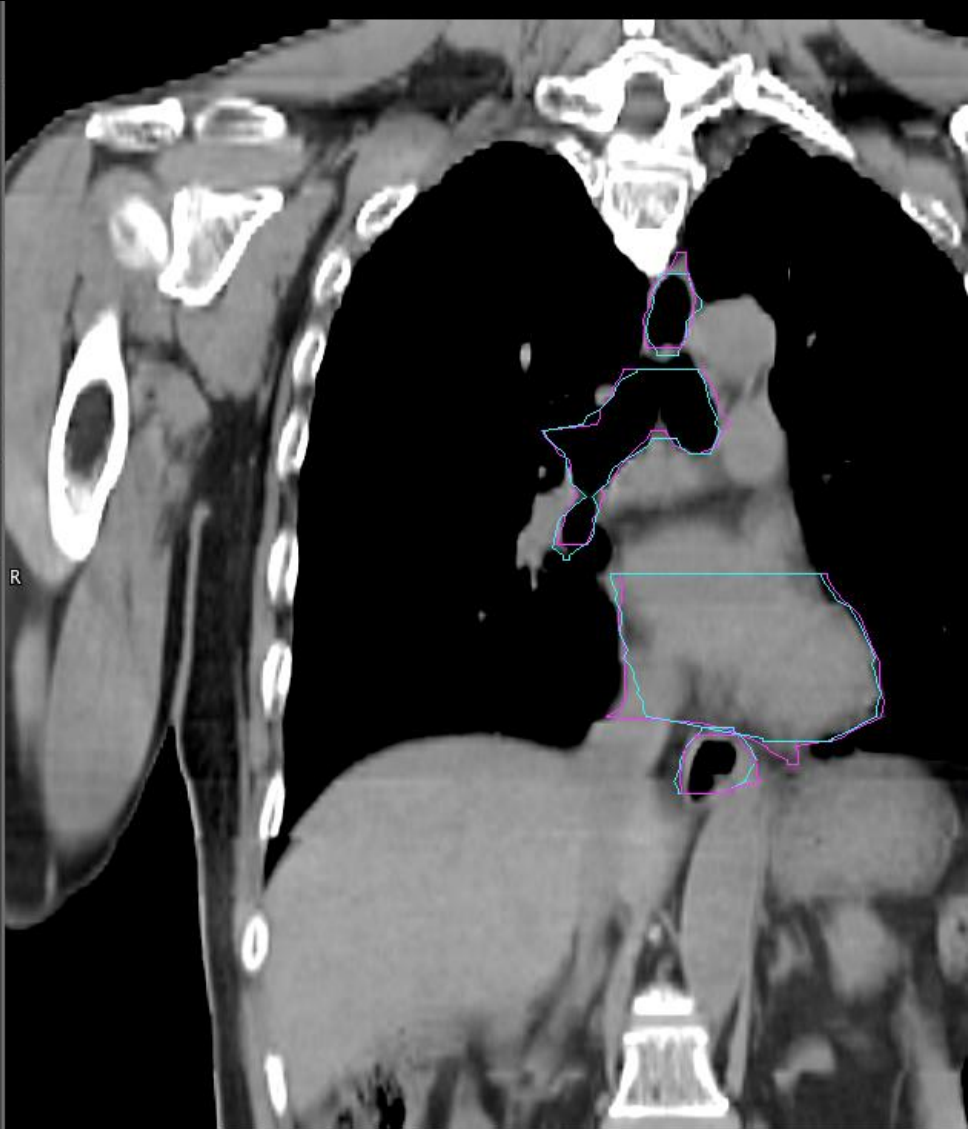

R

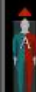

Original\_Images  
BR\_66  
12-17 09:46 AM

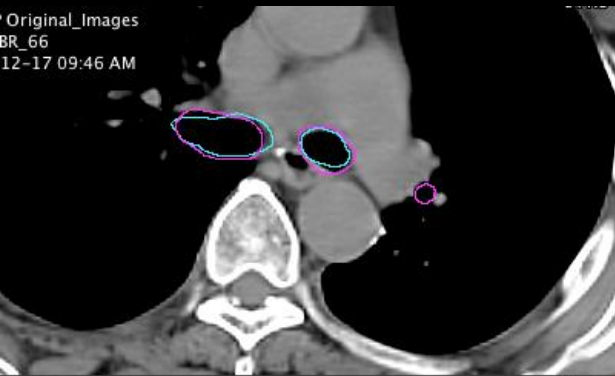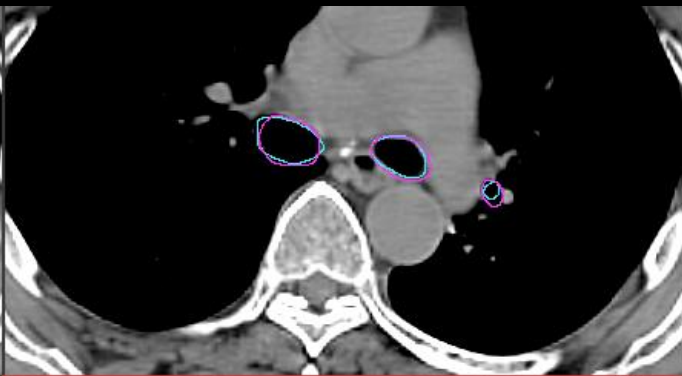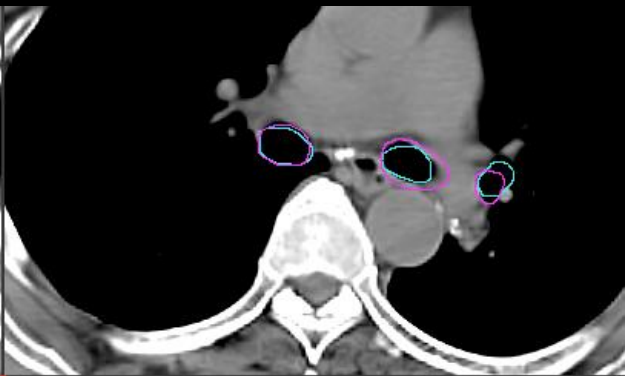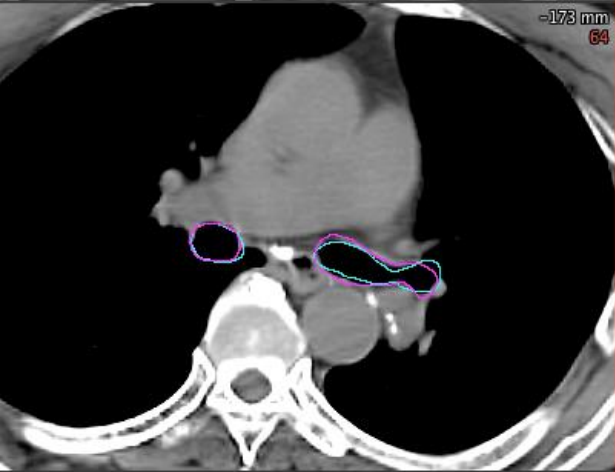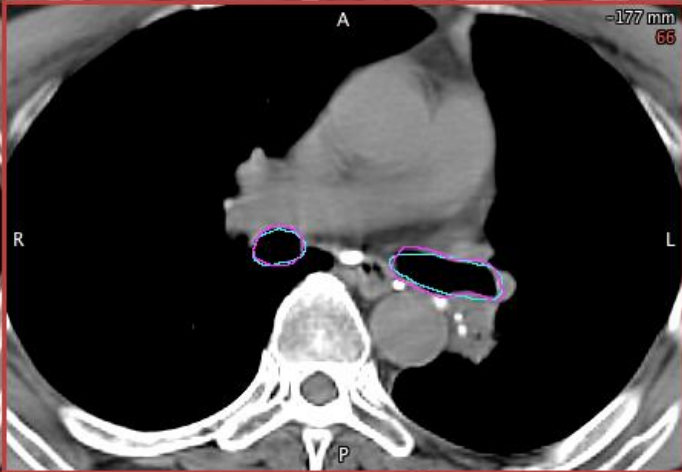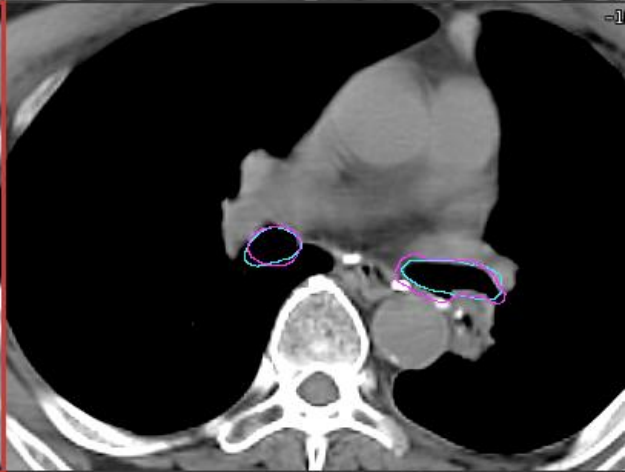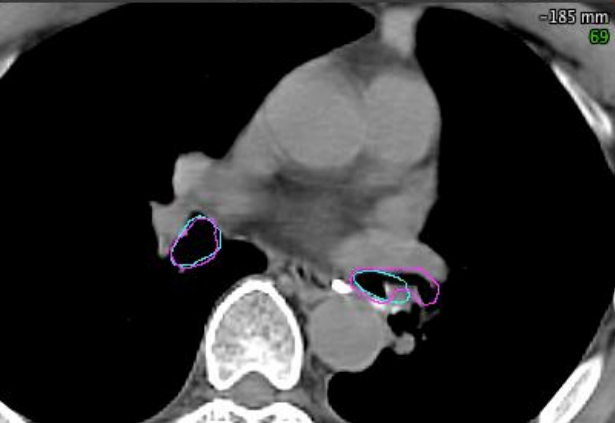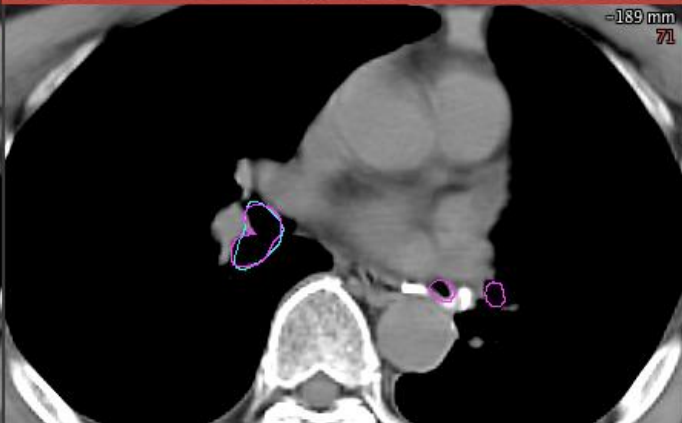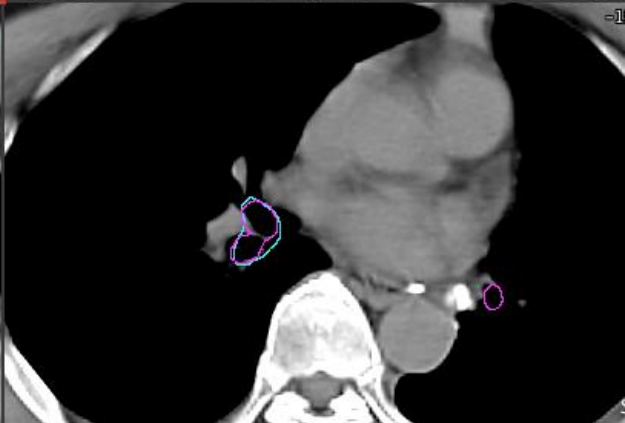

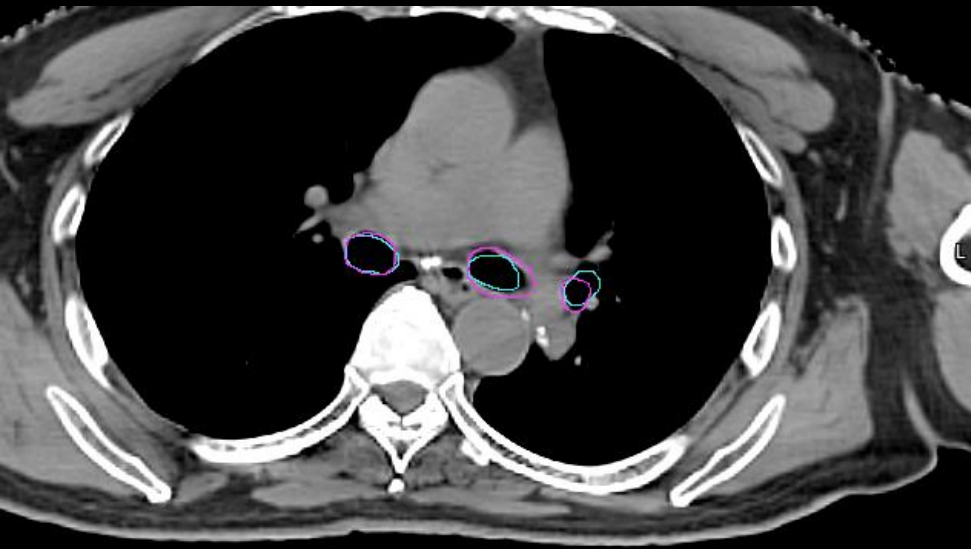

P

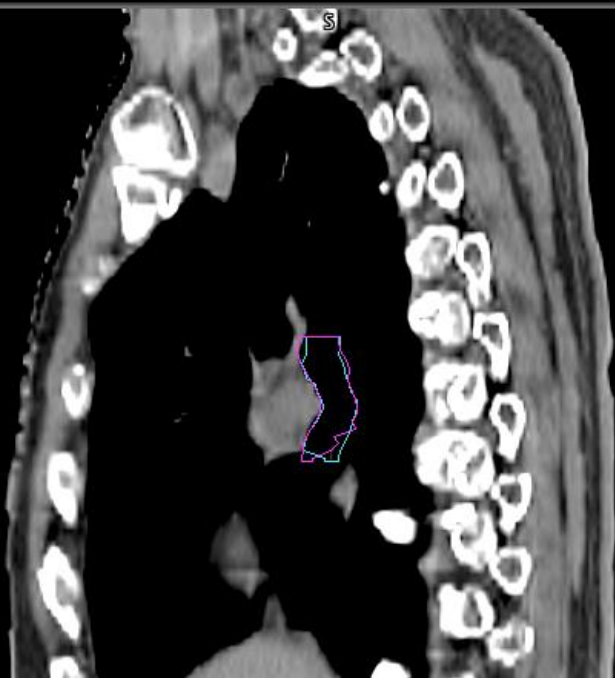

S

-21.57 mm

P

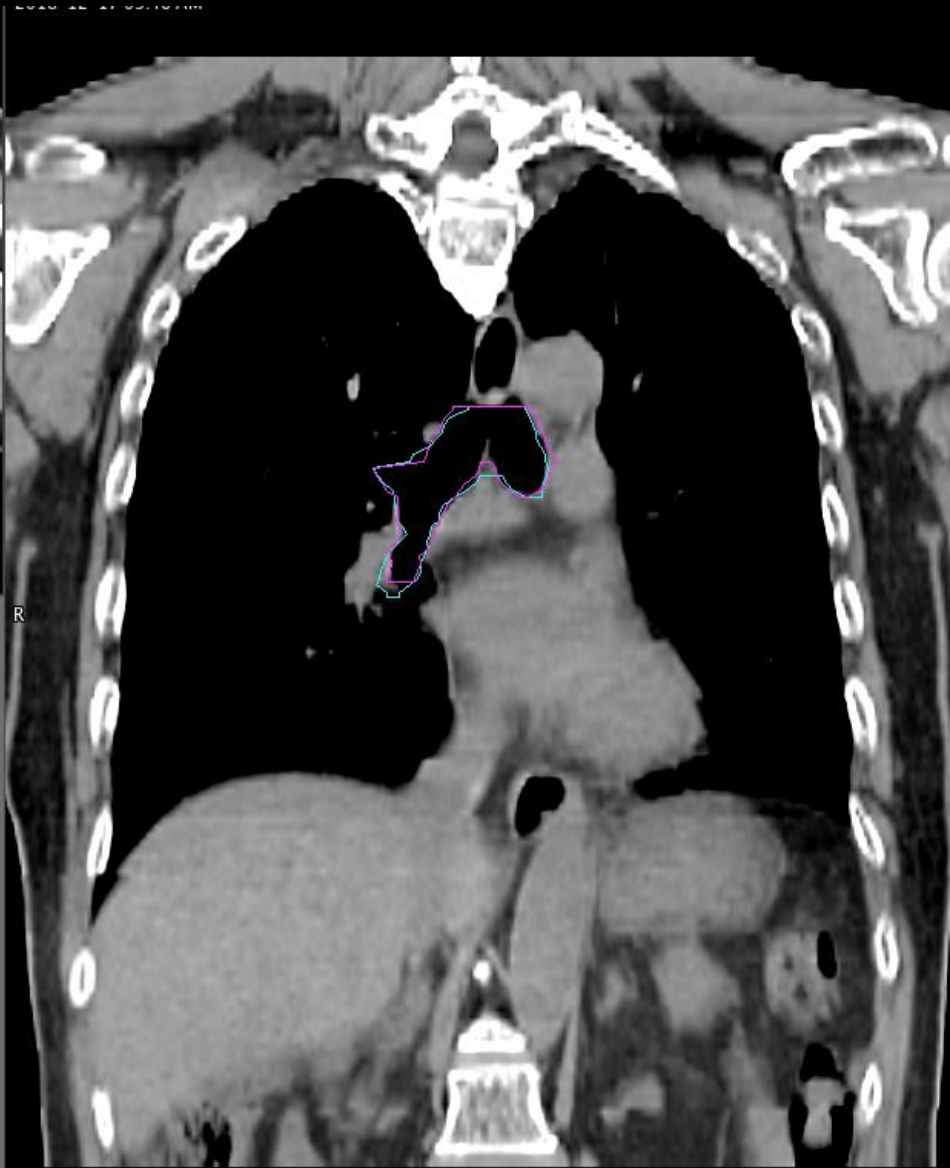

R

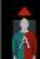

# Additional Examples of Structures

Auto-segmentation = Blue

Manual clinical contour = Purple

CT1  
CASE\_44  
Ave-IP10: 0%, 10%, 20%, 30%, 40%, 50%, 60%, 70%, 80%, 90%  
SI\_SABR\_44  
Apr. 07, 2017 13:01:00

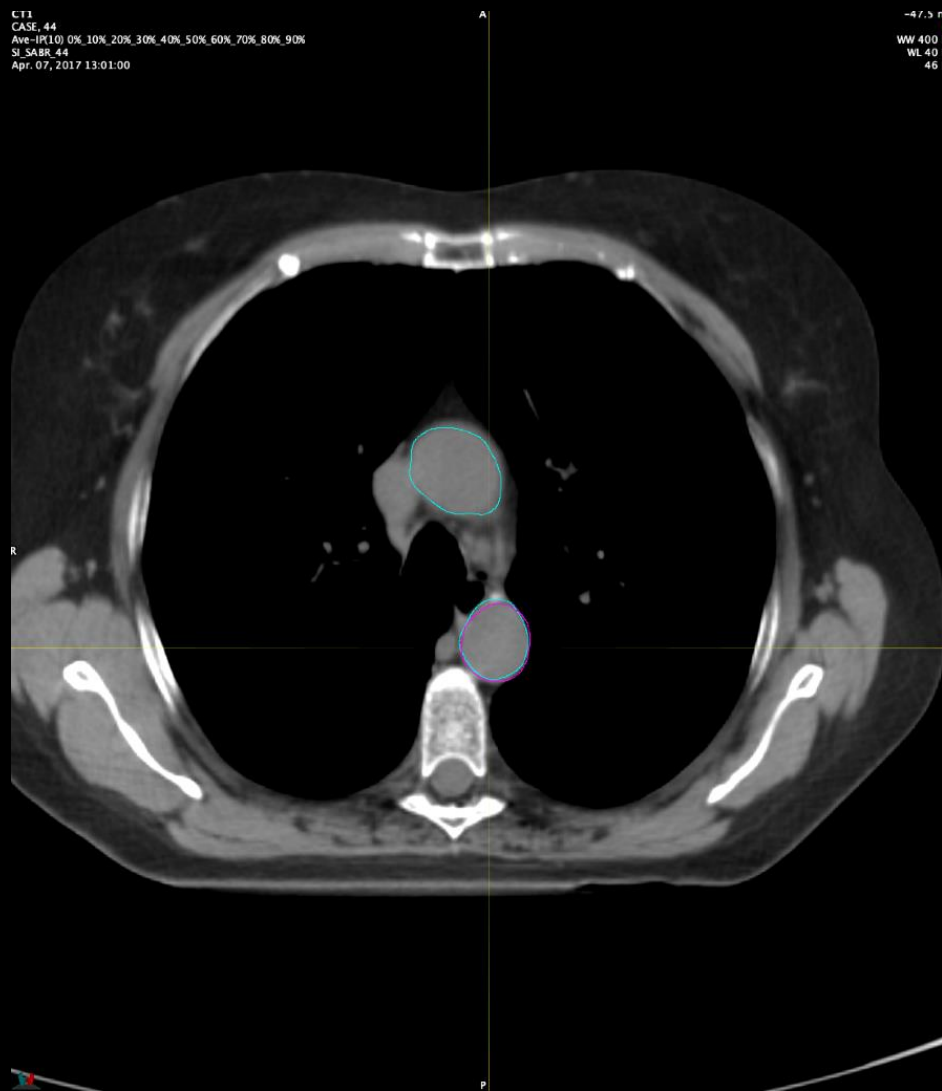

-47.5 mm  
41  
WW 400 HU  
WL 40 HU  
46 HU

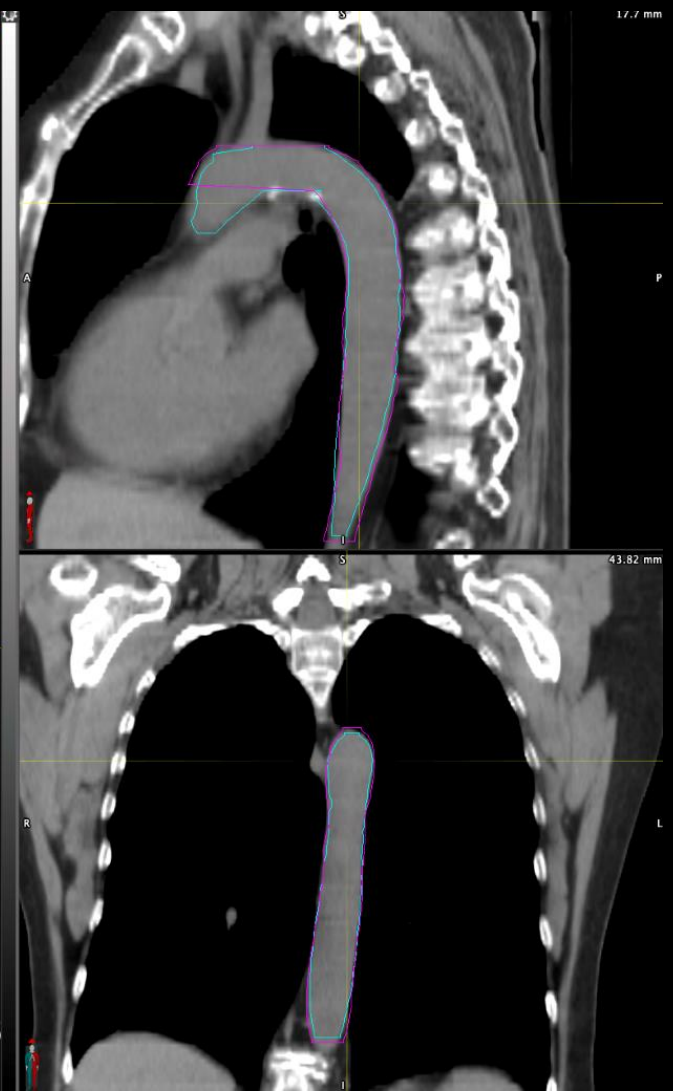

Aorta – 95% HD 3.95mm, DSC 0.85 (sup and inf borders cropped to same plane before comparison)

CT1  
88, Case  
HELICAL  
FV\_SABR\_88  
Jun. 21, 2016 08:50:00

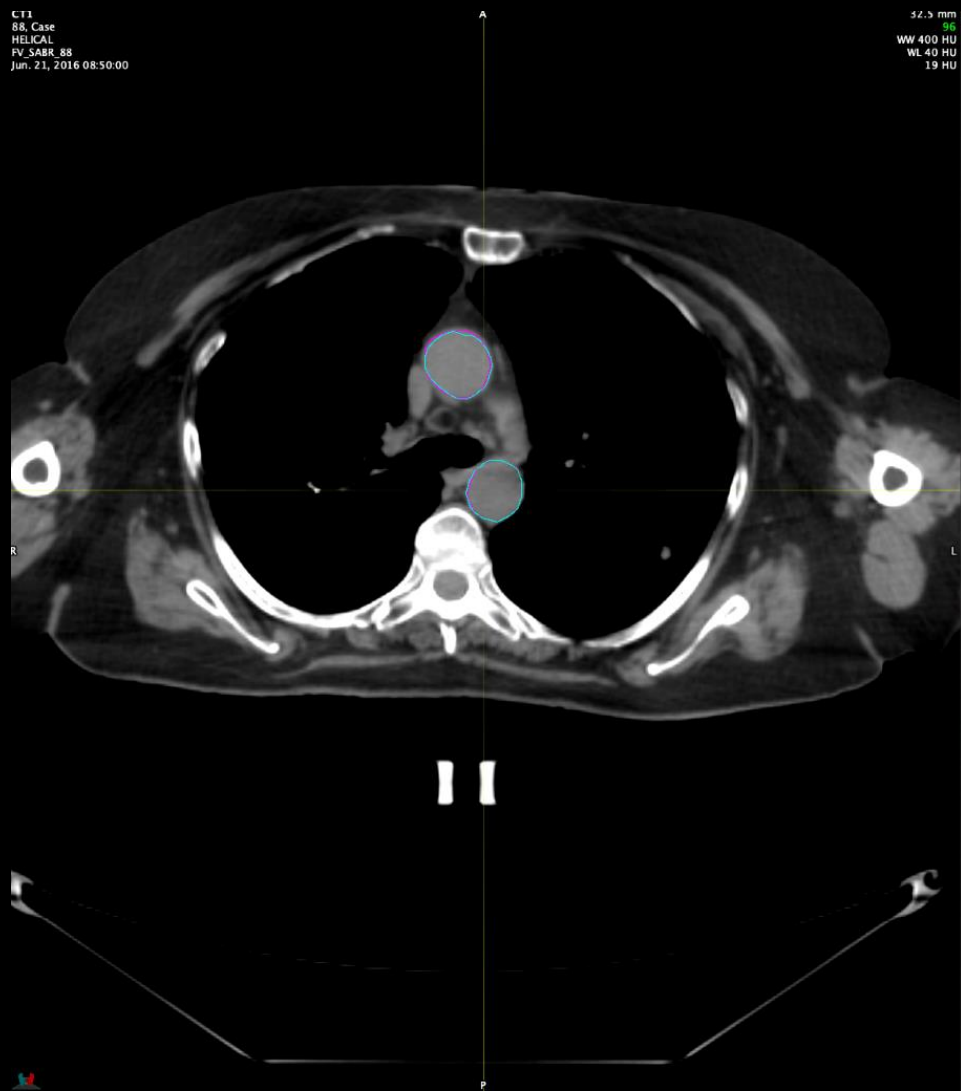

52.5 mm  
96  
WW 400 HU  
WL 40 HU  
19 HU

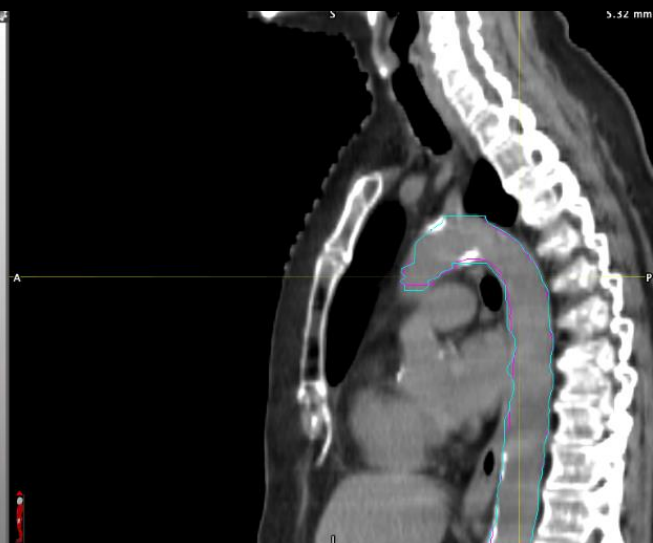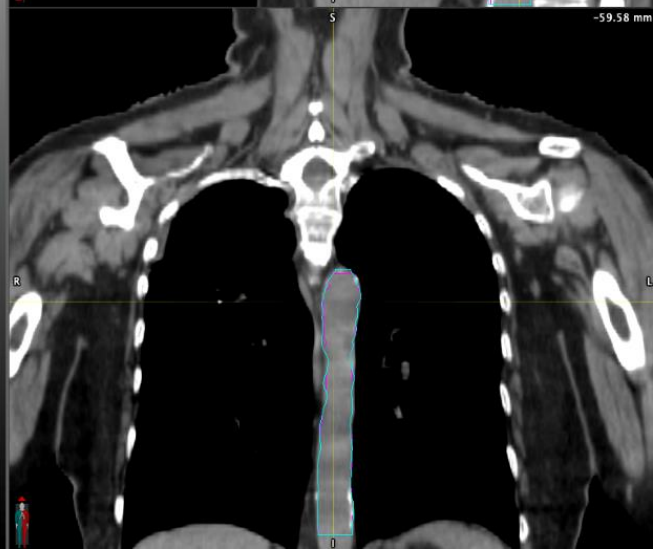

Aorta – 95% HD 1.64mm, DSC 0.98 (sup and inf borders cropped to same plane before comparison)



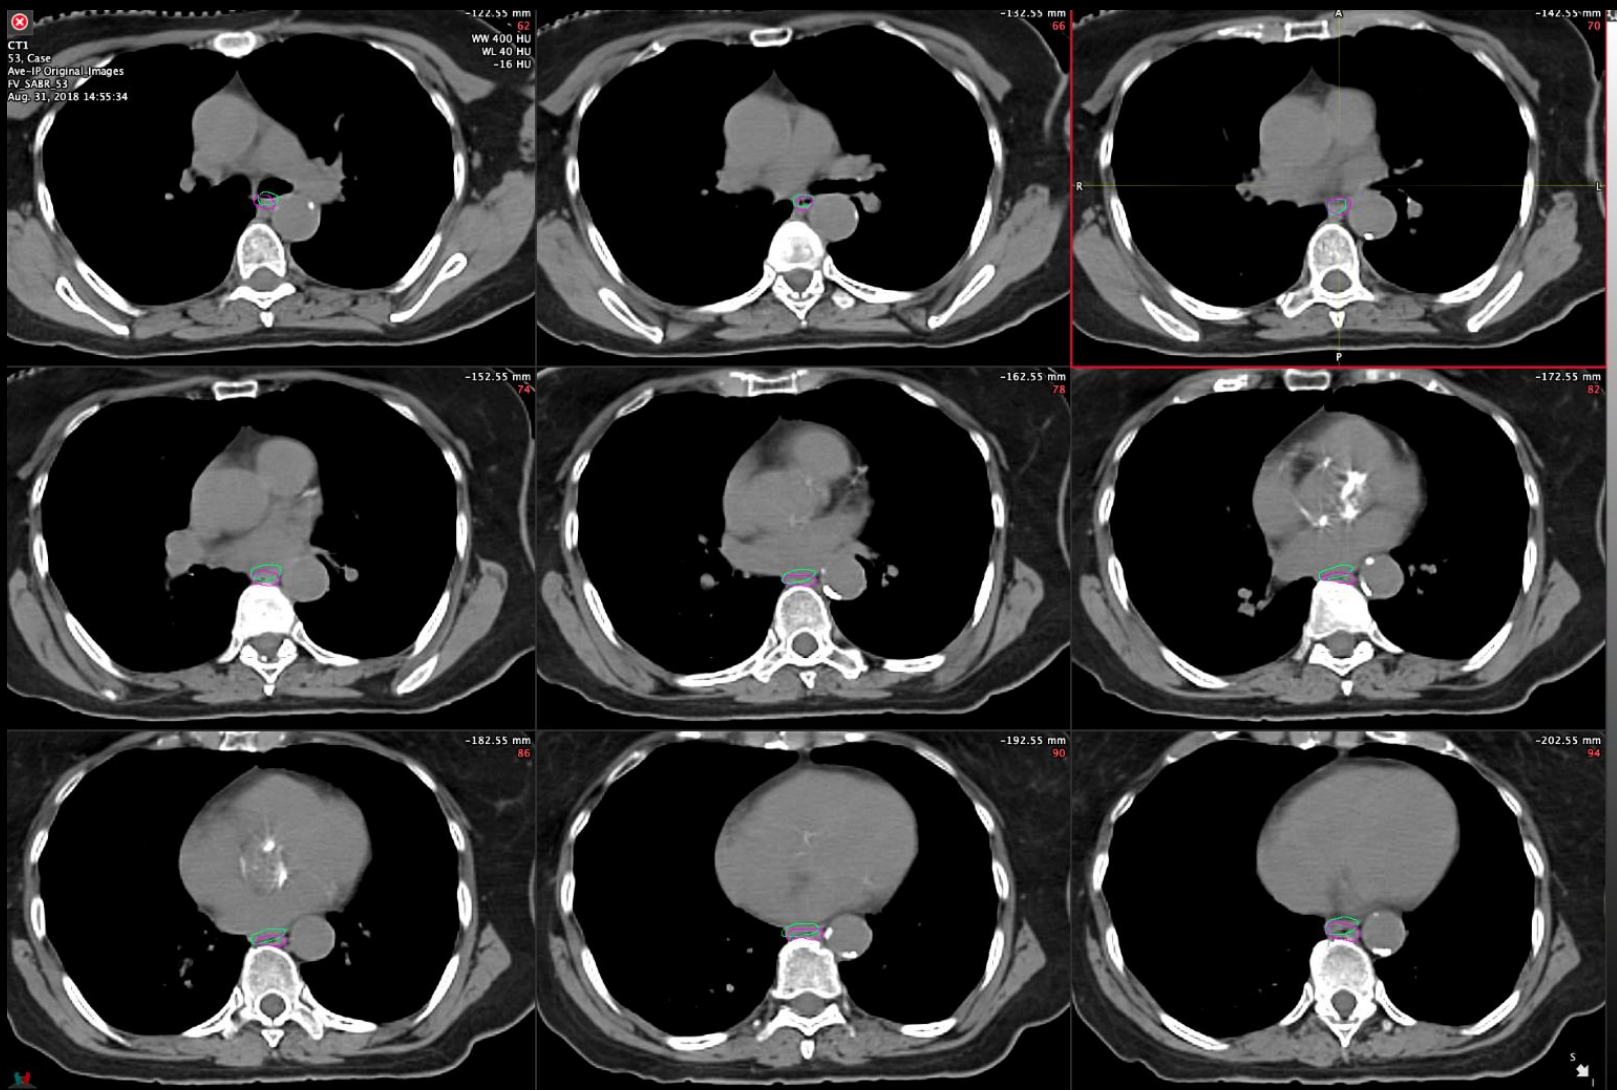

Esophagus – 95% HD 3.73mm, DSC 0.64

CT1  
CASE: 32  
Ave-IP(10) 0%, 10%, 20%, 30%, 40%, 50%, 60%, 70%, 80%, 90%  
SI\_SABR\_32  
Jul. 07, 2017 14:43:18

14.75 mm  
2.5  
WW 400 HU  
WL 40 HU  
-84 HU

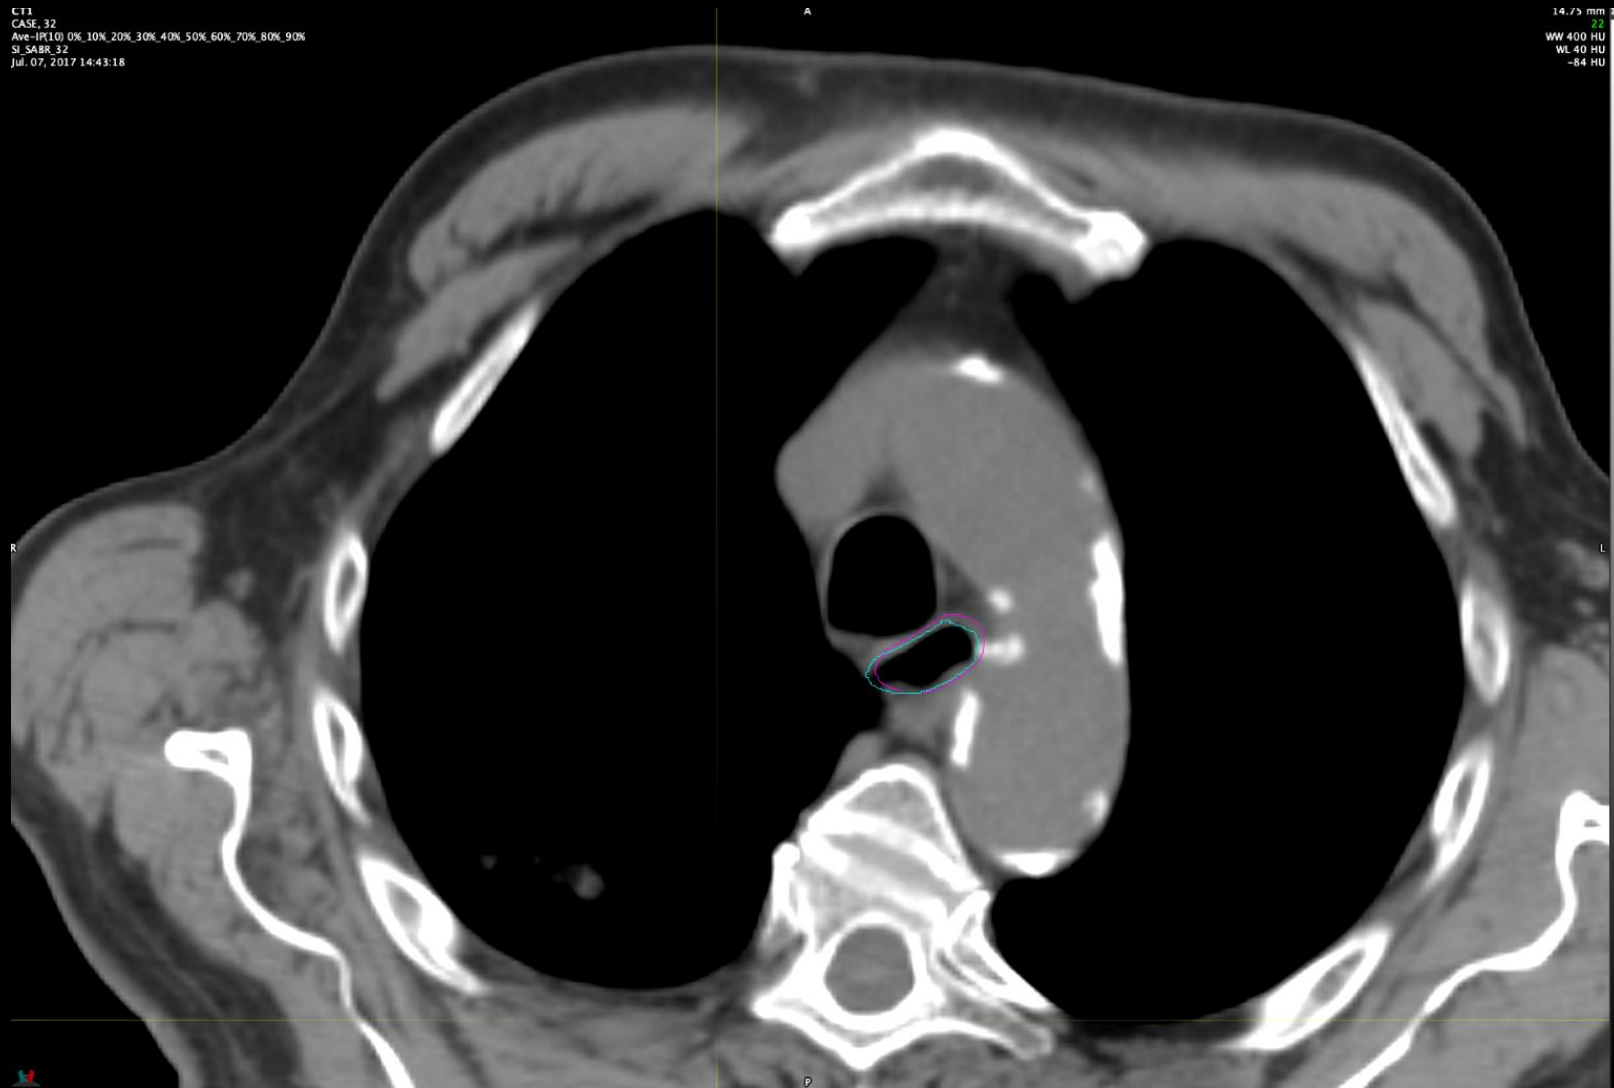

Esophagus – 95% HD 2.14mm, DSC 0.96

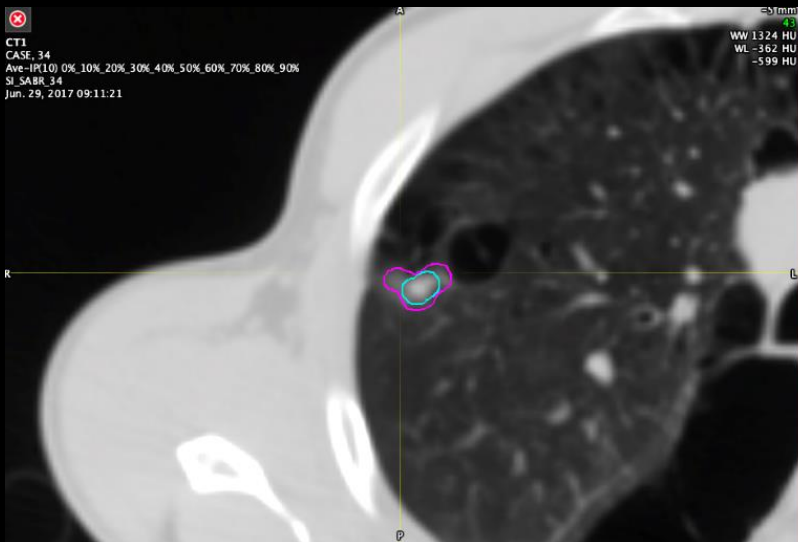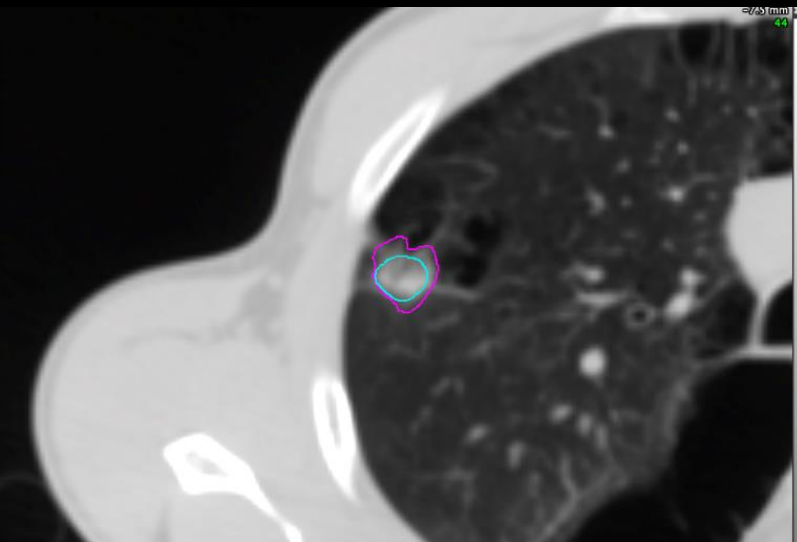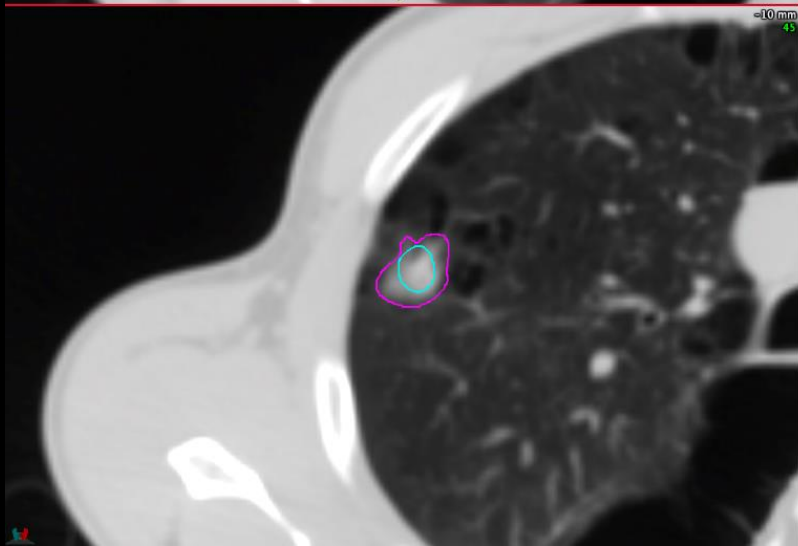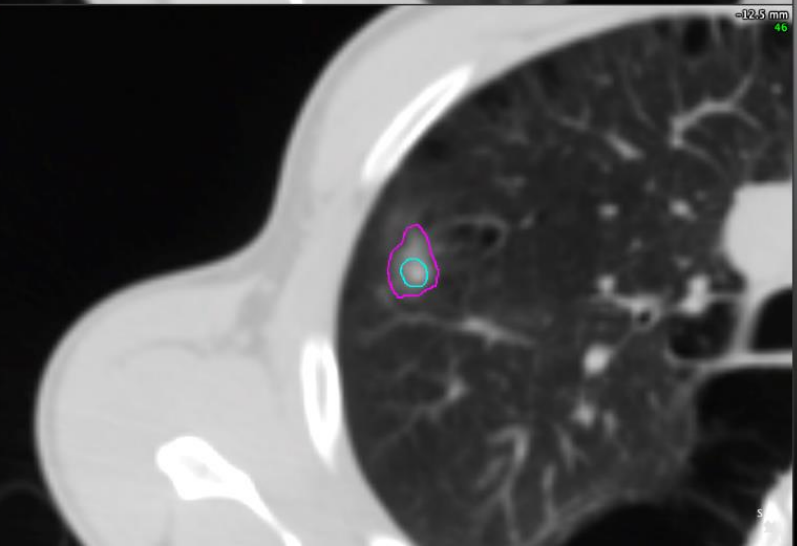

GTV – 95% HD 5.4mm, DSC 0.19

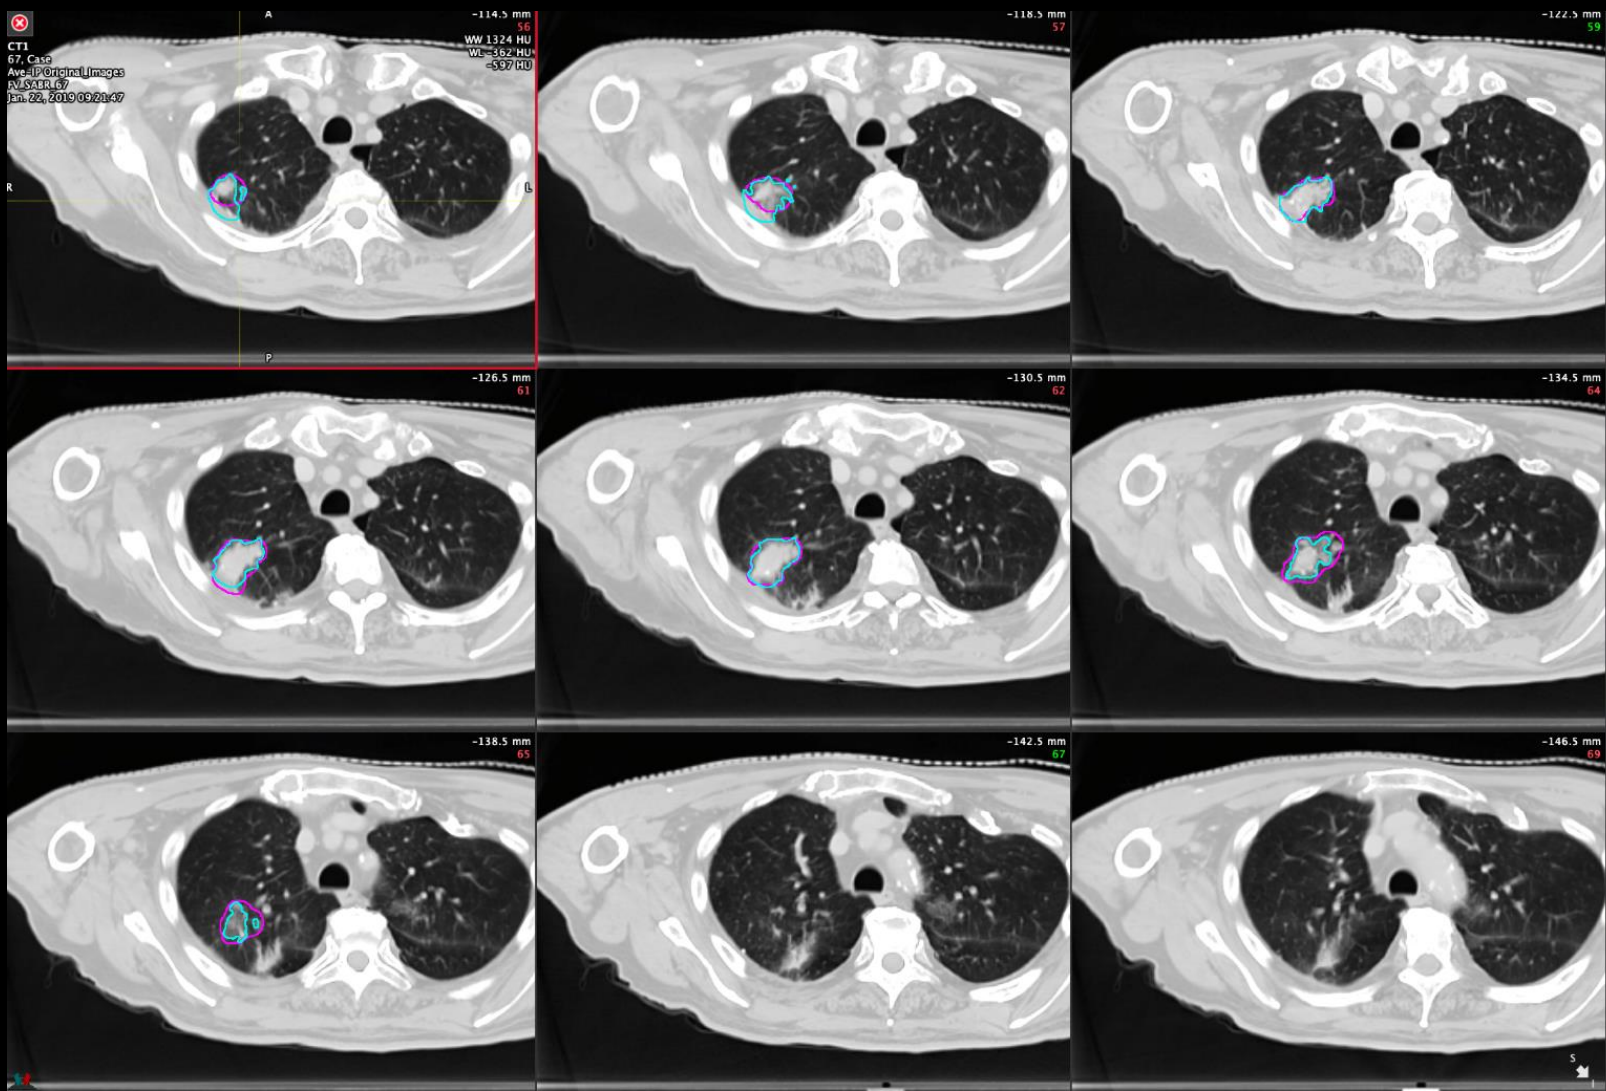

GTV – 95% HD 3.25mm, DSC 0.90

CT1  
CASE\_05  
Ave-IP(L) 0%\_10%\_20%\_30%\_40%\_50%\_60%\_70%\_80%\_90%  
SI\_SABR\_05  
Aug. 13, 2018 09:20:44

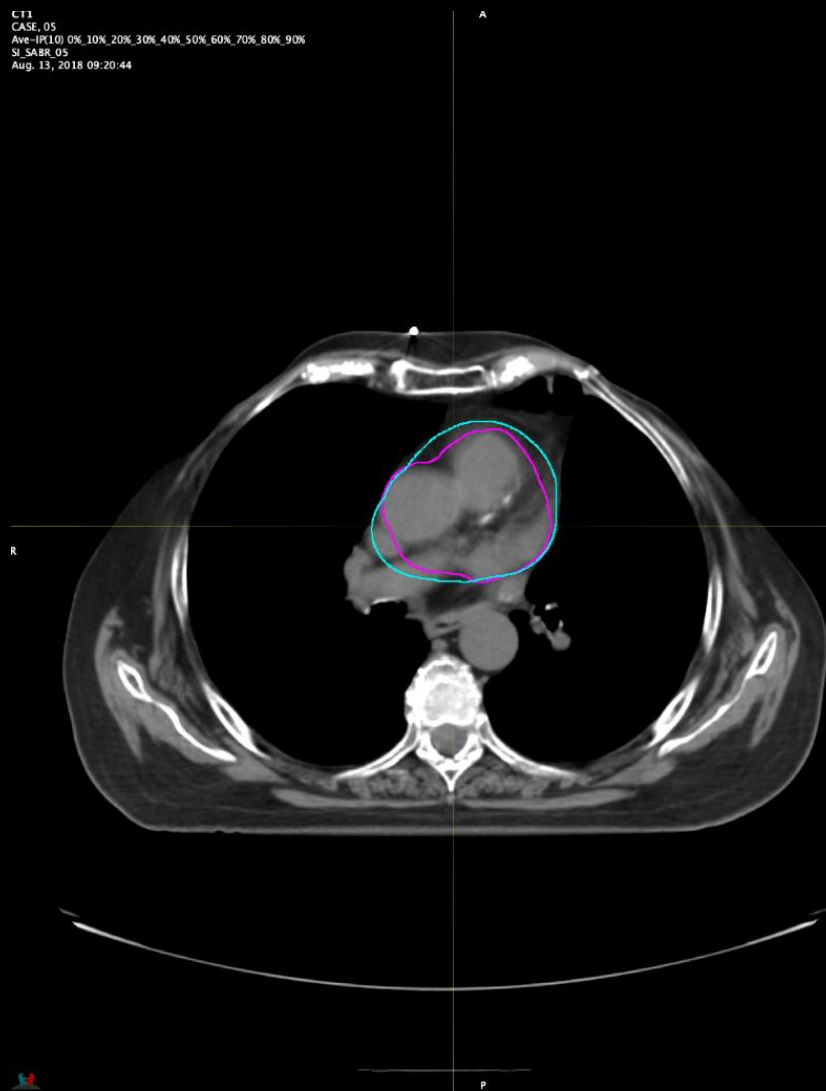

2.5 mm  
56  
WW 400 HU  
WL 40 HU  
-19 HU

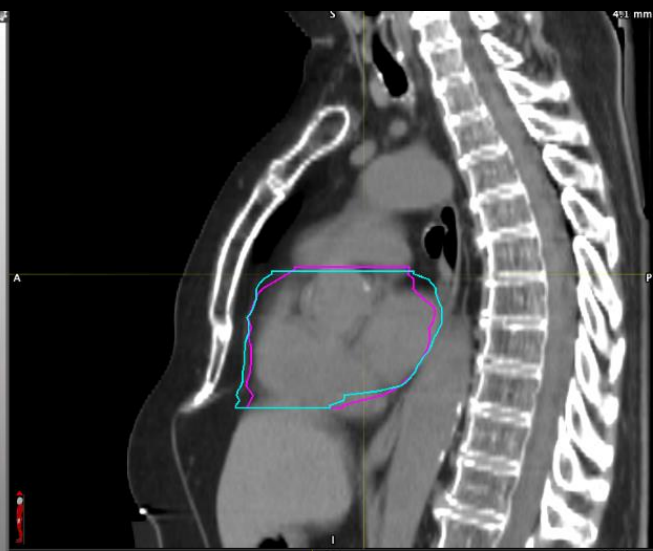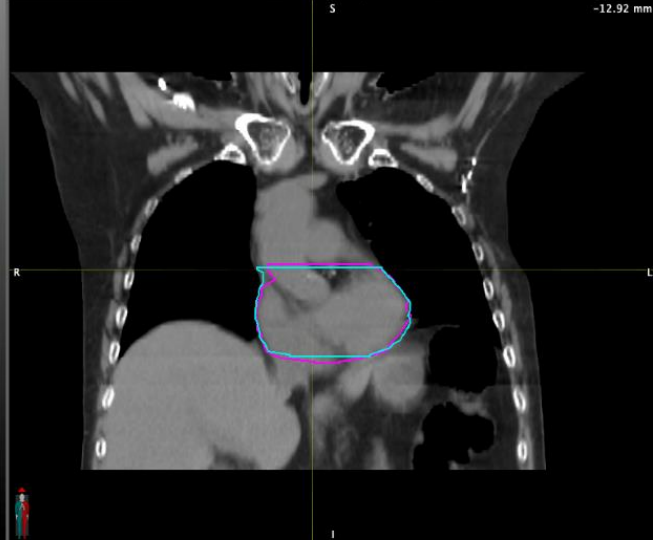

Heart – 95% HD 7.8mm, DSC 0.90

C11  
67, Case  
Ave-IP Original\_Images  
FV\_SABR\_67  
Jan. 22, 2019 09:21:47

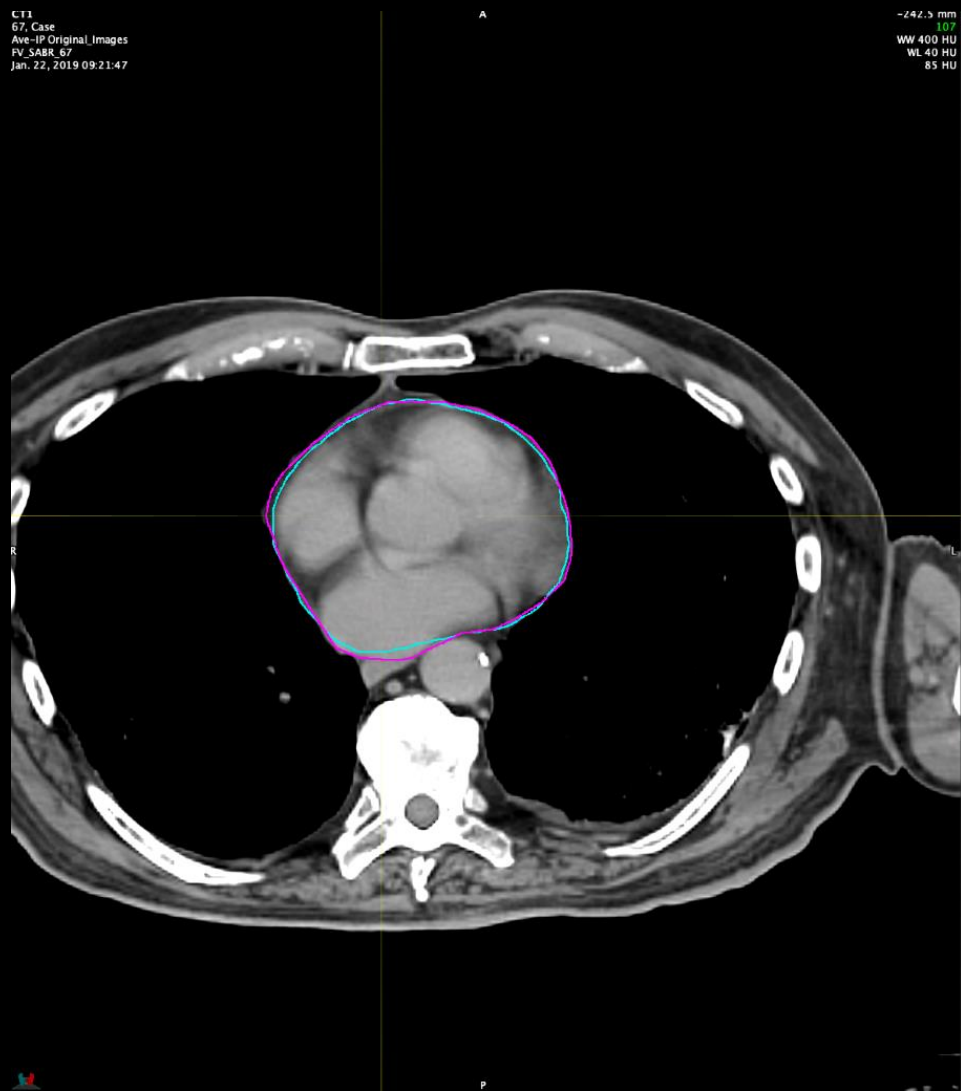

-242.5 mm  
107  
WW 400 HU  
WL 40 HU  
85 HU

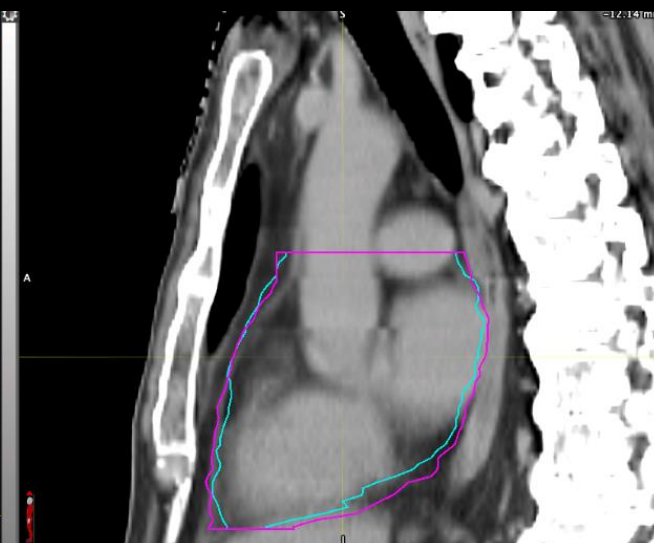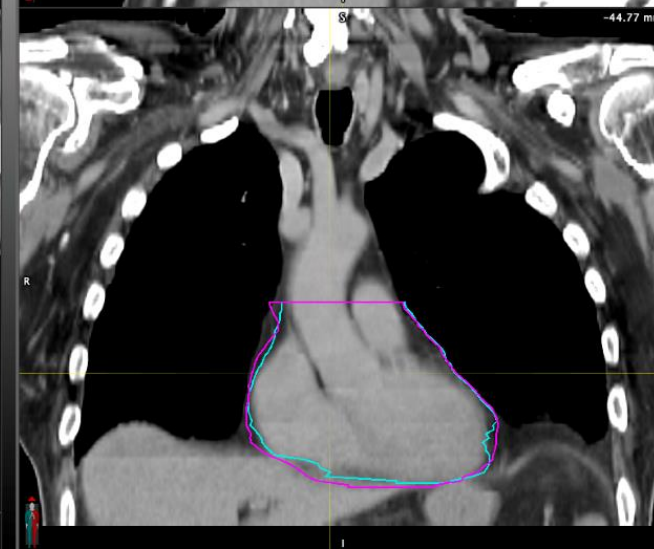

Heart – 95% HD 4.56mm, DSC 0.98

CT1  
CASE: 35  
Ave-IP(10) 0%, 10%, 20%, 30%, 40%, 50%, 60%, 70%, 80%, 90%  
SI\_SABR\_35  
Jun. 30, 2017 14:56:39

-65 mm  
67  
WW 1324 HU  
WL -362 HU  
-440 HU

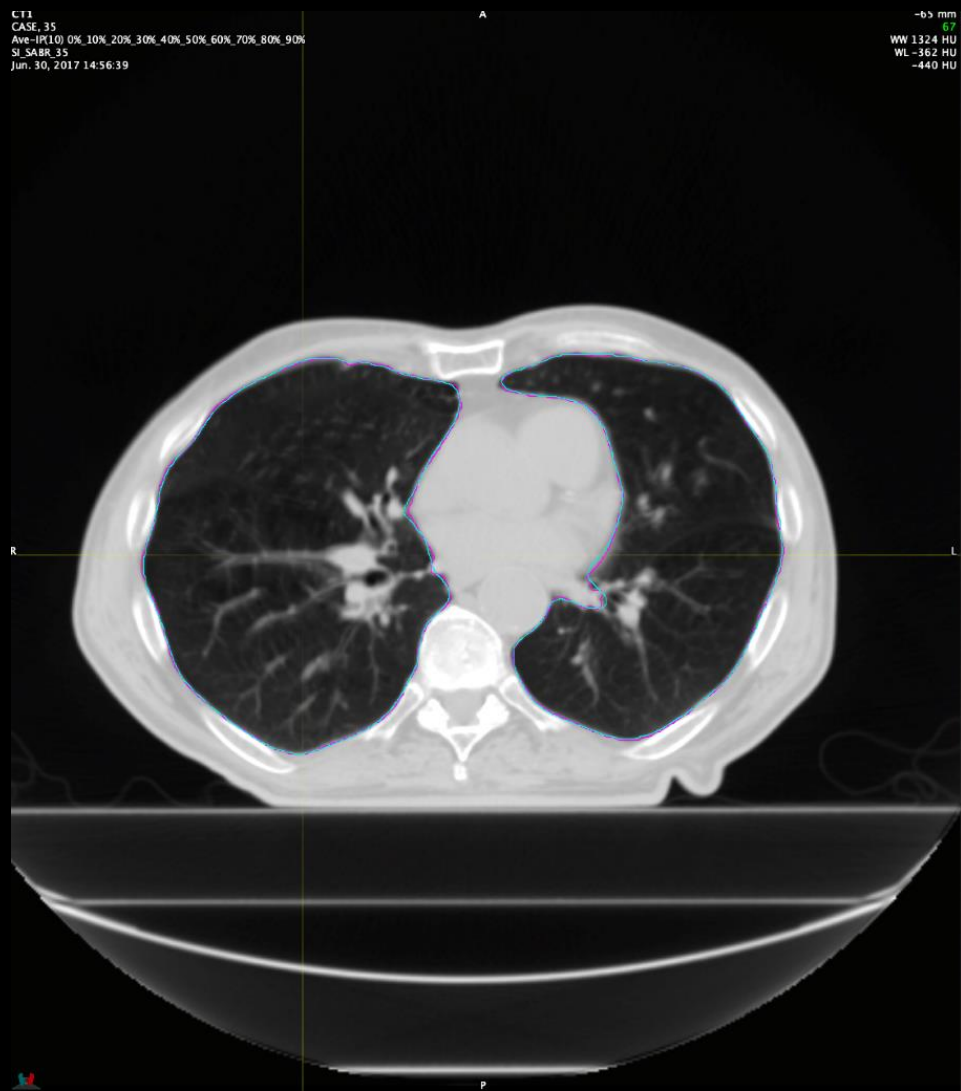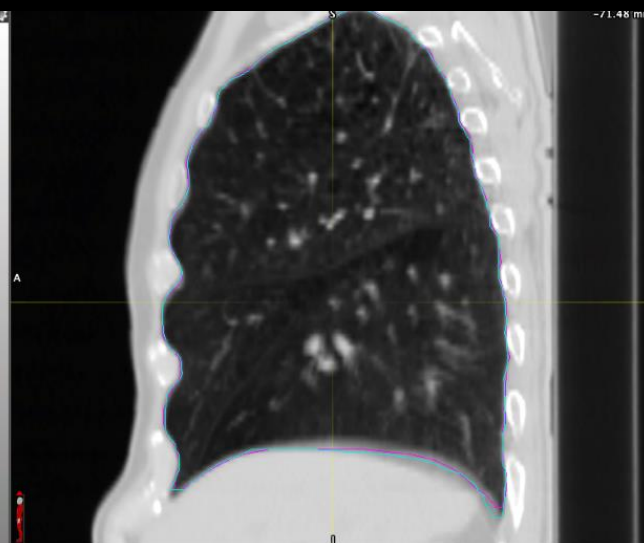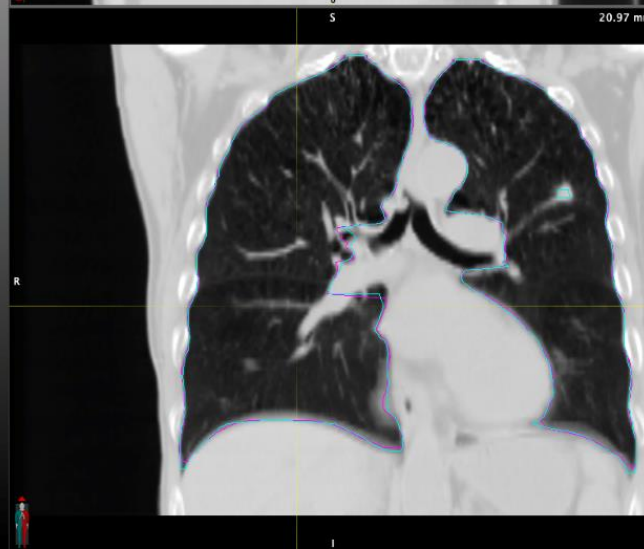

Lung left (lung window) – 95% HD 1.97mm, DSC 0.99  
Lung right (lung window) – 95% HD 2.58mm, DSC 0.99

CT1  
CASE: 35  
Ave-IP(10) 0%, 10%, 20%, 30%, 40%, 50%, 60%, 70%, 80%, 90%  
SI\_SABR\_35  
Jun. 30, 2017 14:56:39

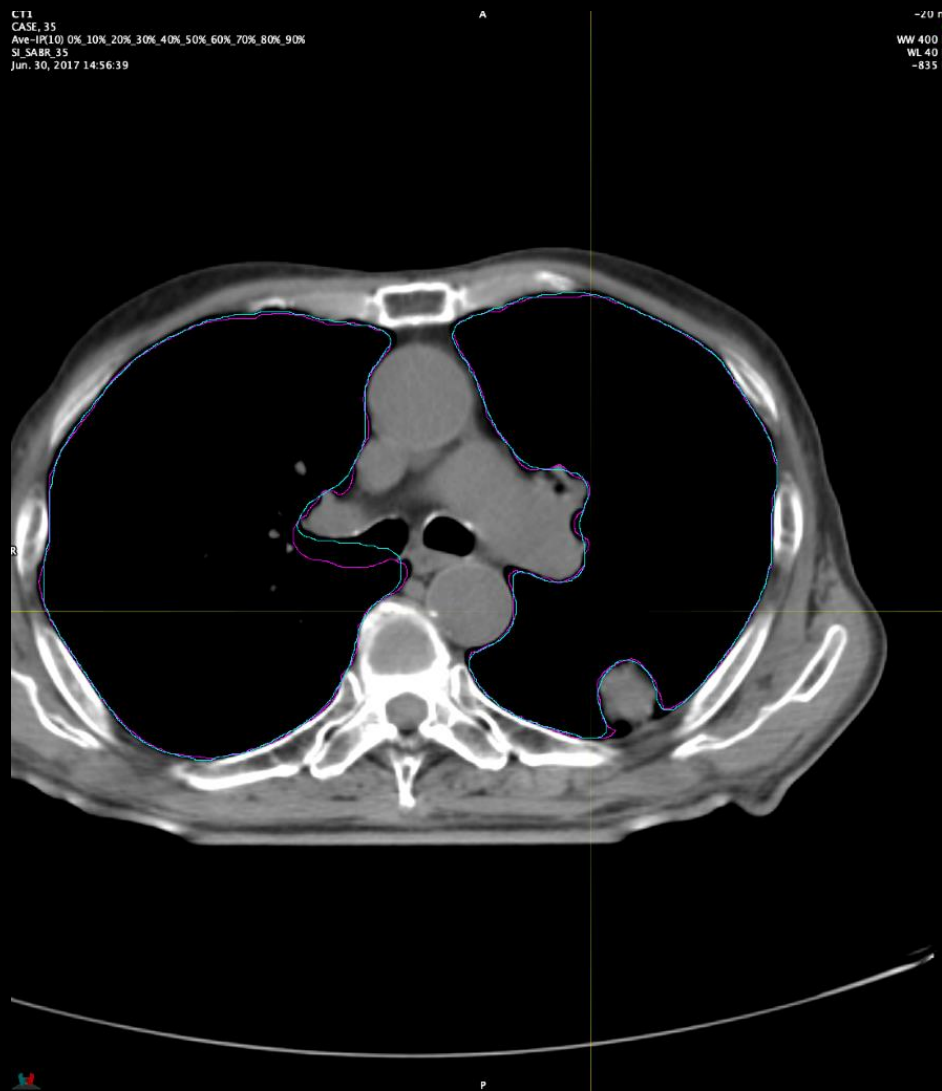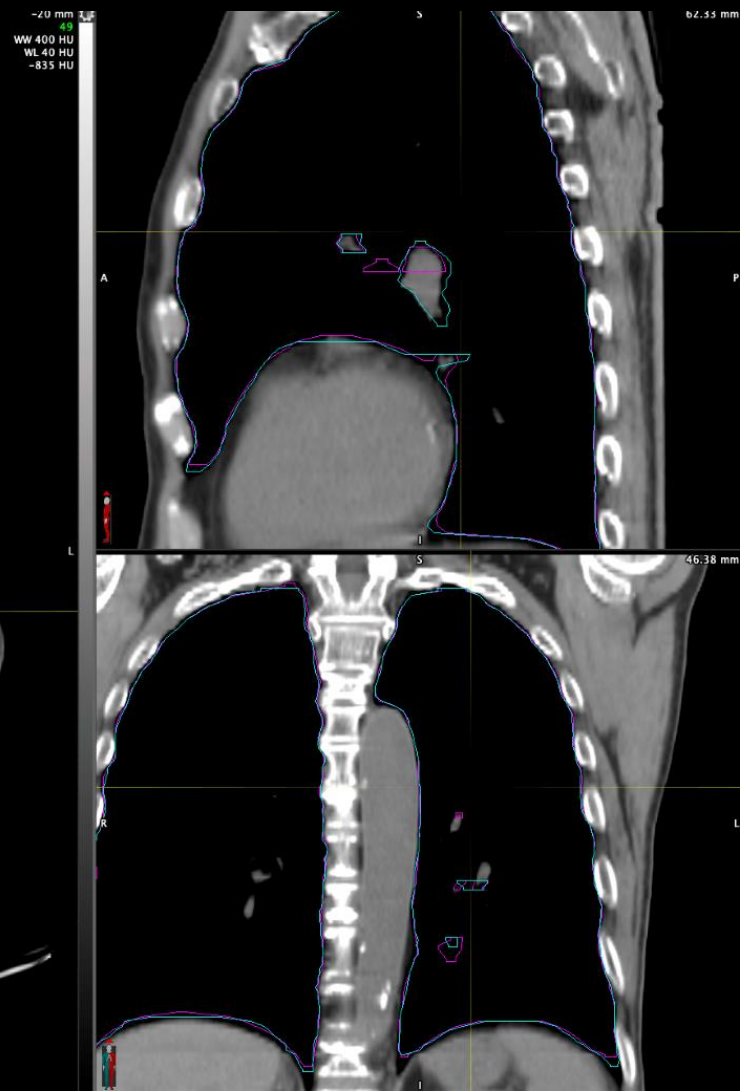

Lung left (soft tissue window) – 95% HD 1.97mm, DSC 0.99  
Lung right (soft tissue window) – 95% HD 2.58mm, DSC 0.99



CT1  
CASE: 36  
CT  
Ave-IP(10) 0%\_10%\_20%\_30%\_40%\_50%\_60%\_70%\_80%\_90%  
SI\_SABR\_36  
Jun. 21, 2017 14:16:46

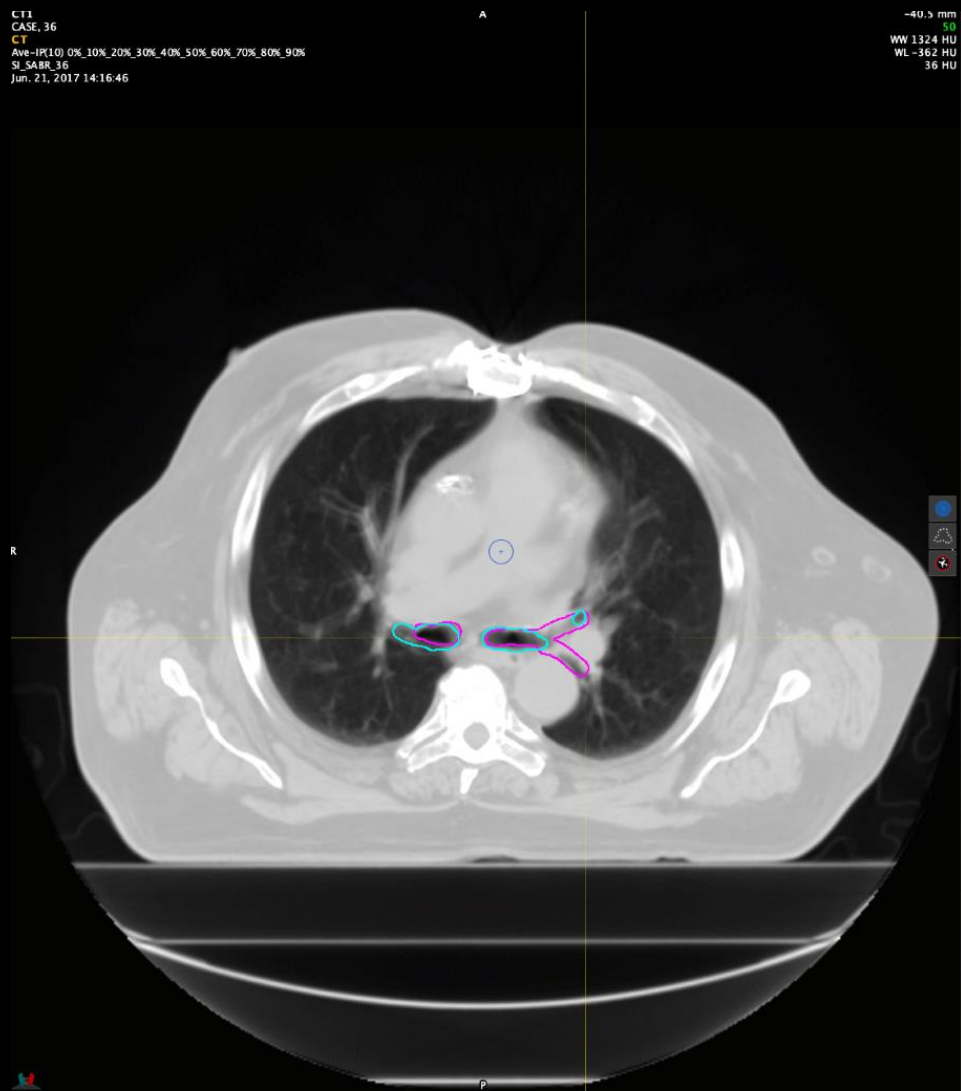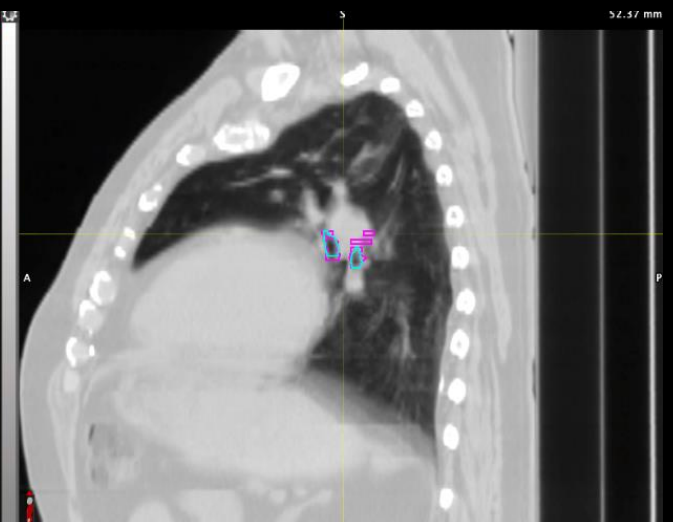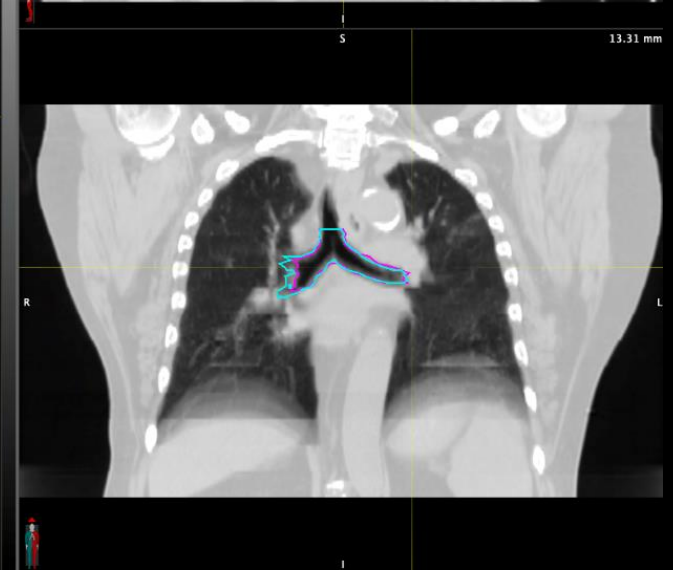

Proximal Bronchial Tree – 95% HD 7.13mm, DSC 0.65

CT1  
84, Case  
HELICAL  
FV\_SABR\_84  
May 06, 2016 14:47:39

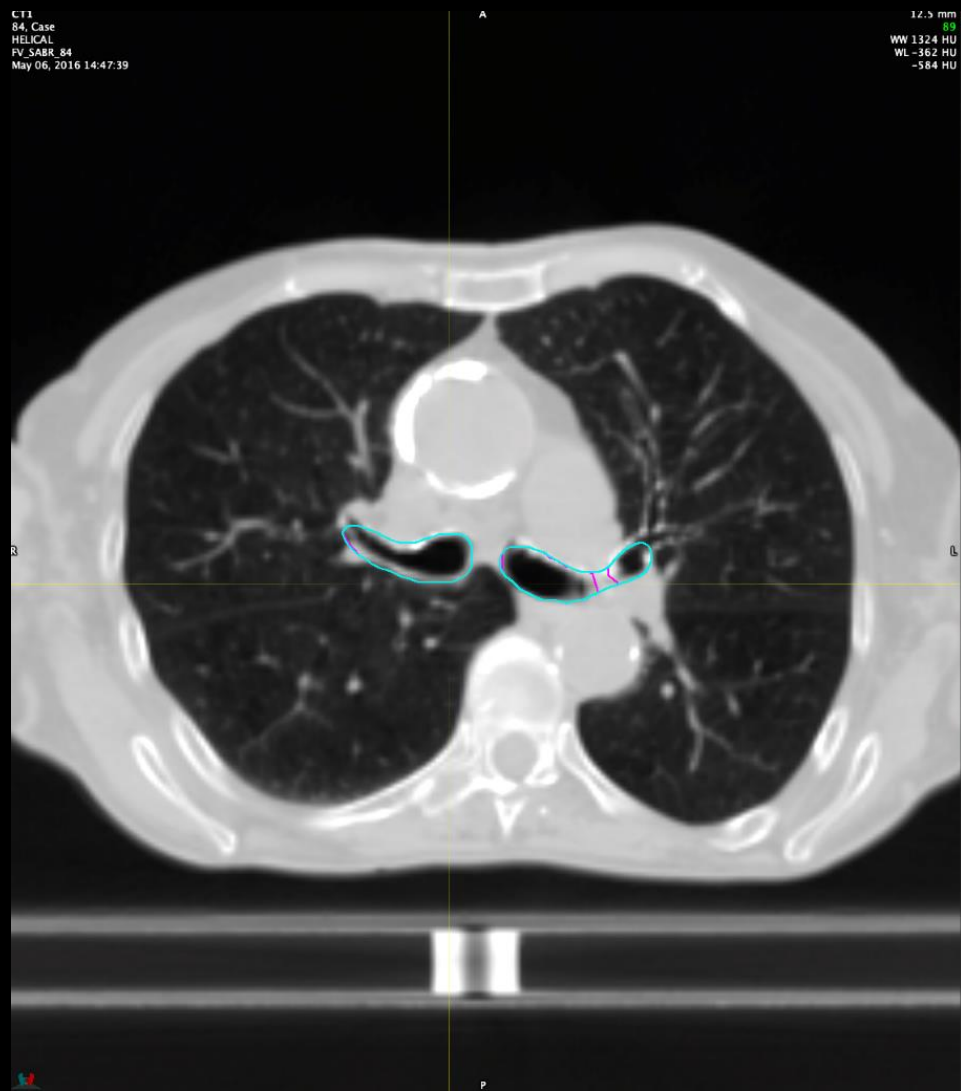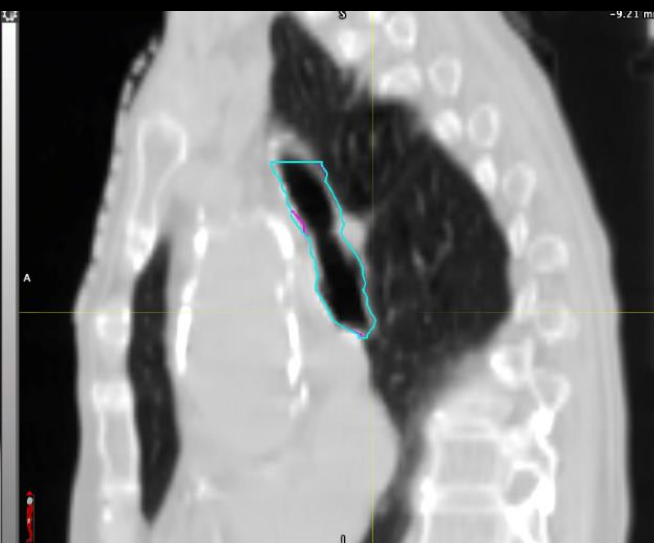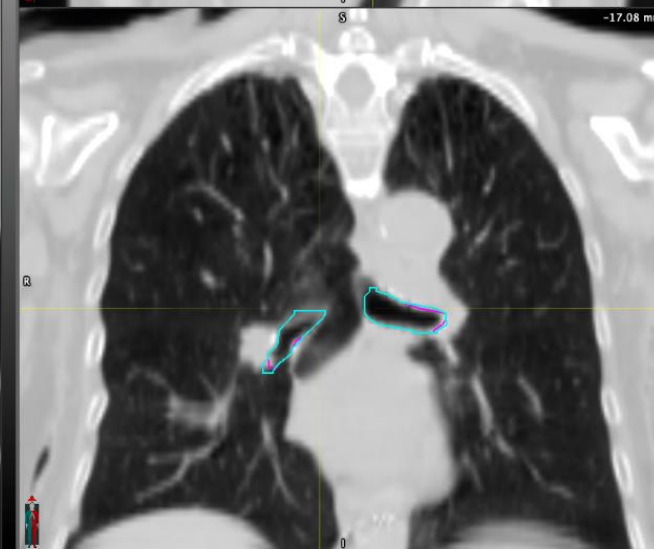

Proximal Bronchial Tree – 95% HD 1.73mm, DSC 0.97

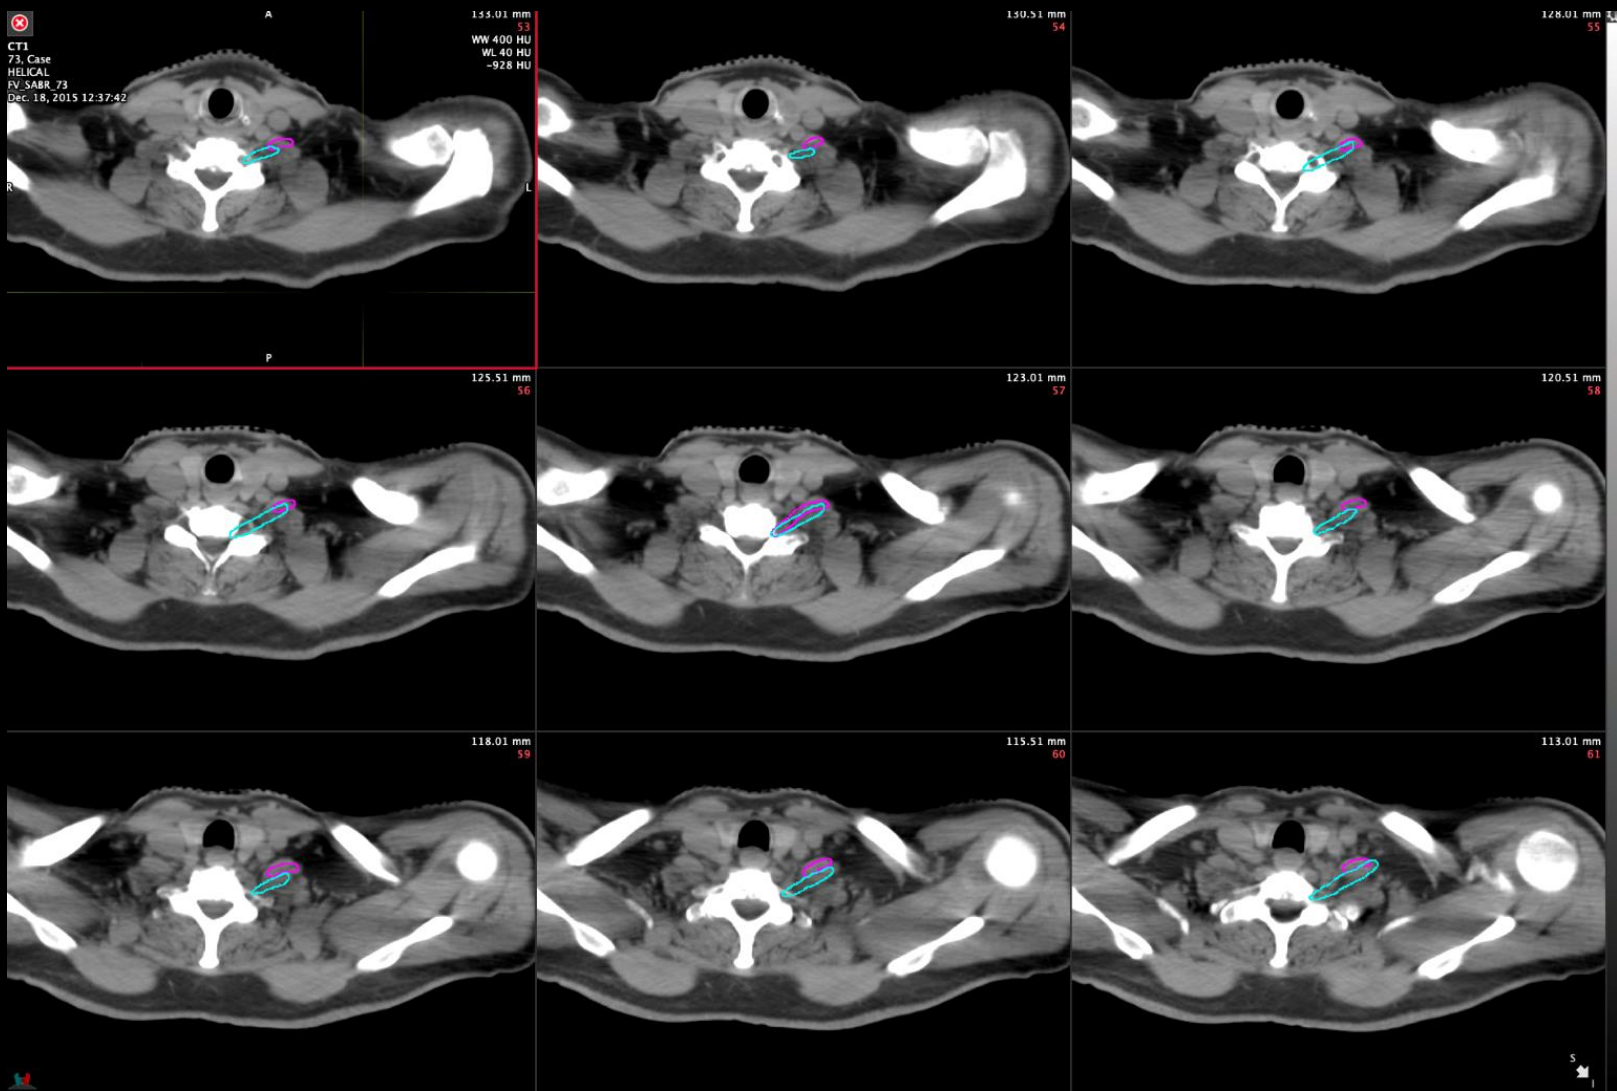

Brachial Plexus – 95% HD 13.65mm, DSC 0.19 (sup and inf borders cropped to same planes before comparison)

CT1  
94, Case  
HELICAL  
FV\_SABR\_94  
Jul. 22, 2016 13:07:00

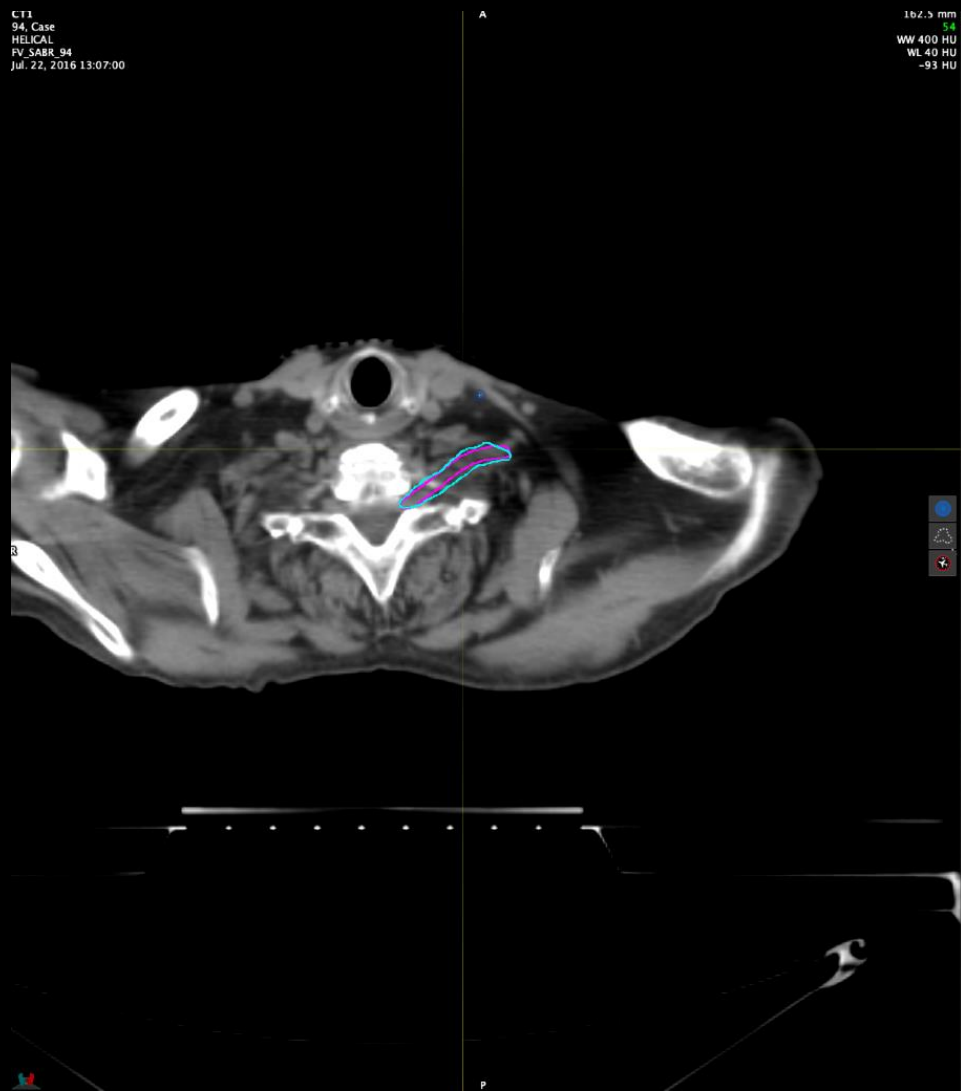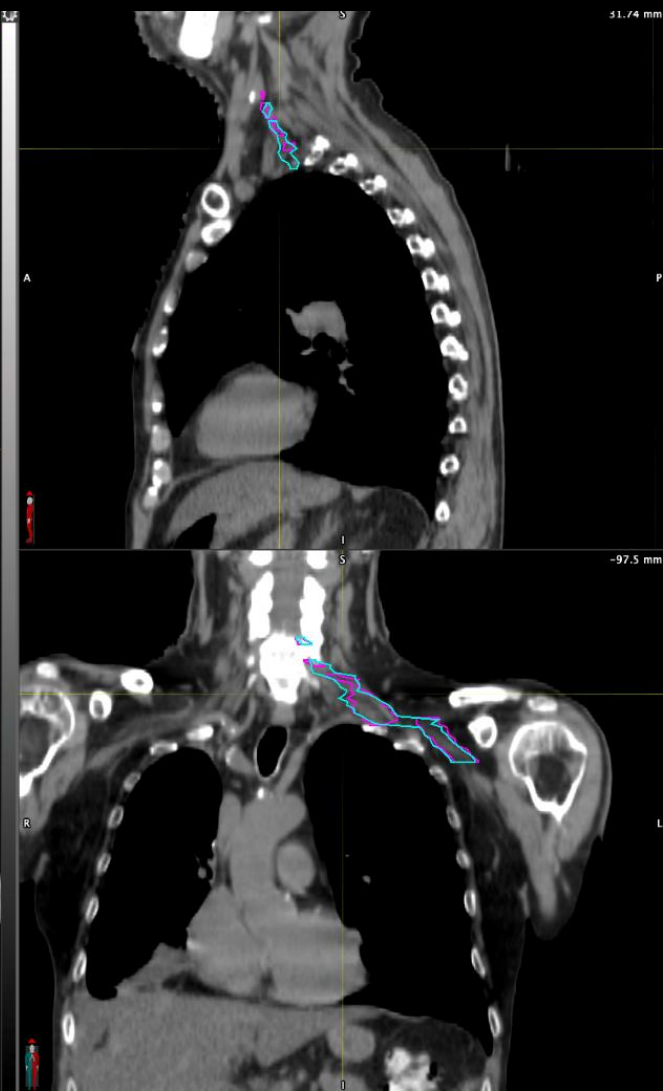

Brachial Plexus – 95% HD 2.99mm, DSC 0.81 (sup and inf borders cropped to same planes before comparison)

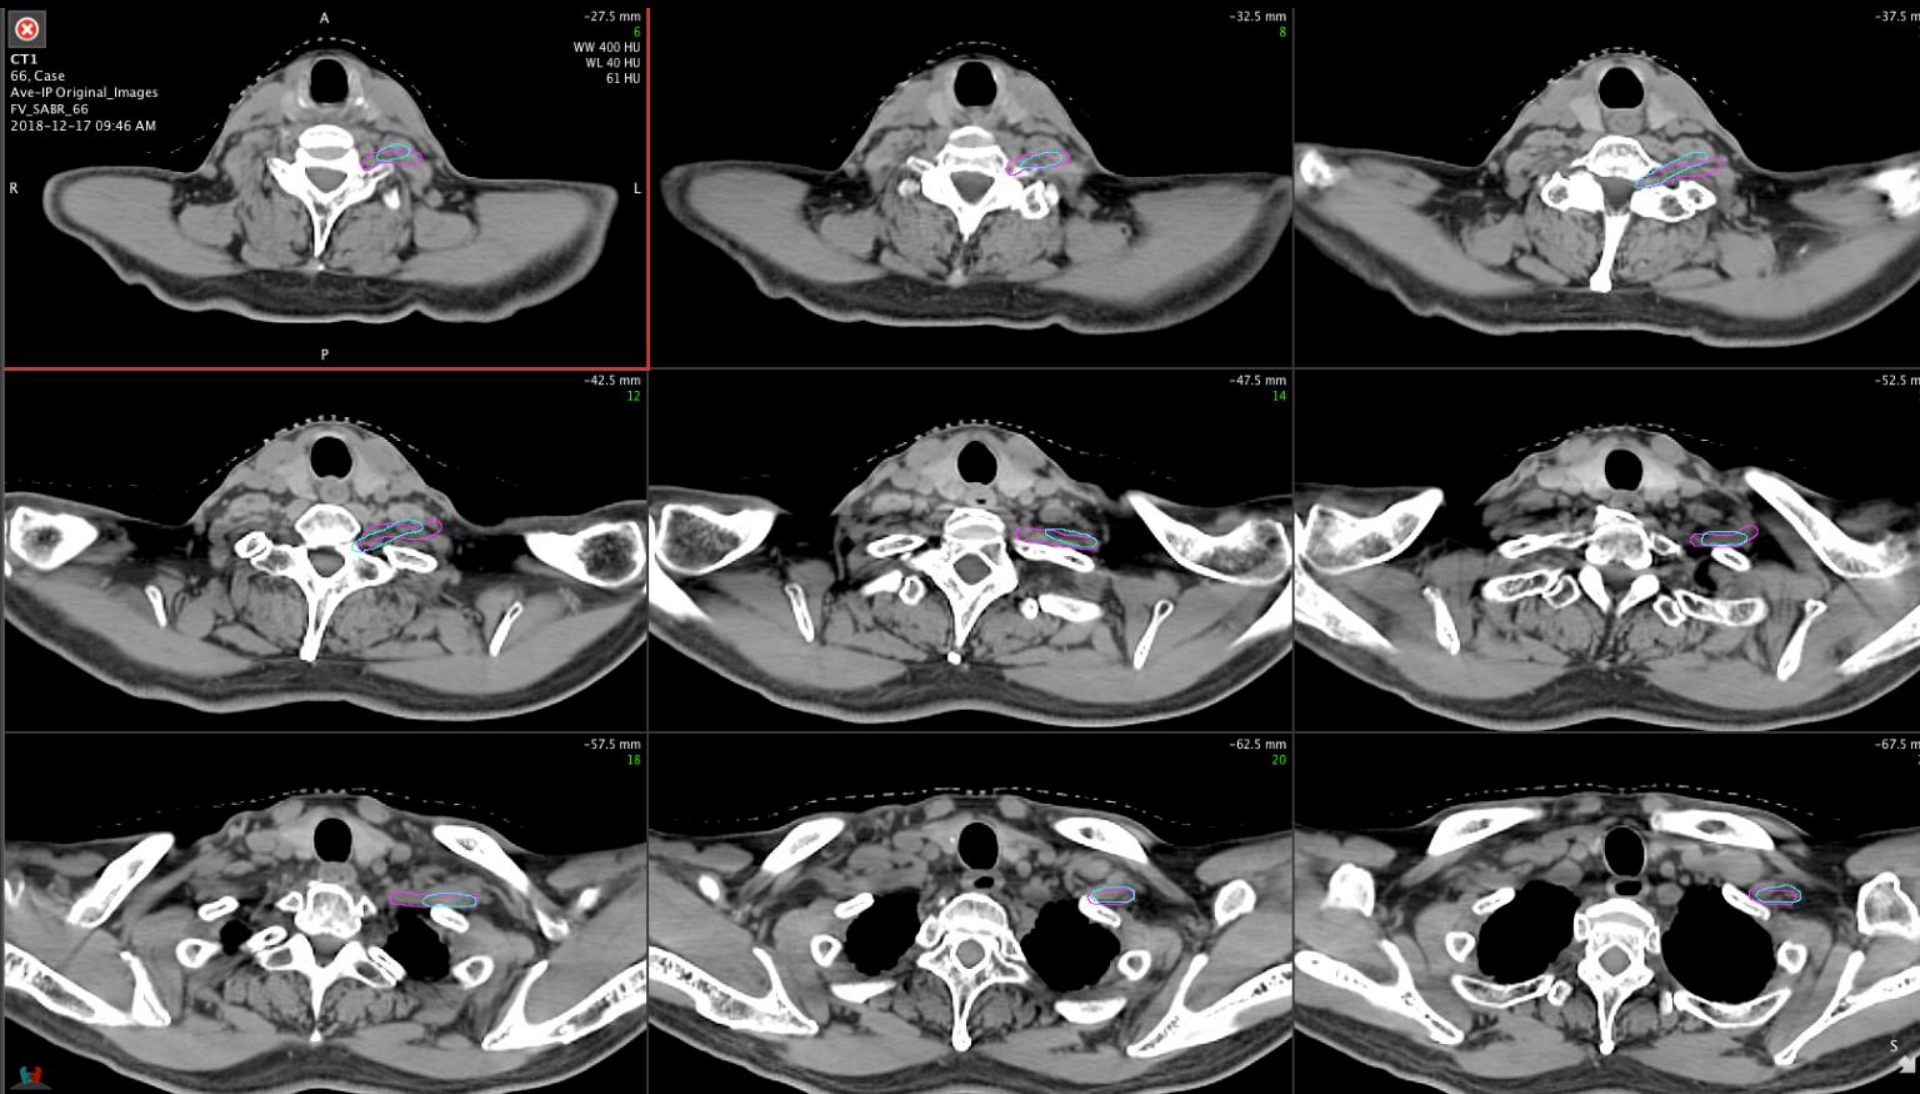

Brachial Plexus – 95% HD 6.04mm, DSC 0.53 (sup and inf borders cropped to same planes before comparison)

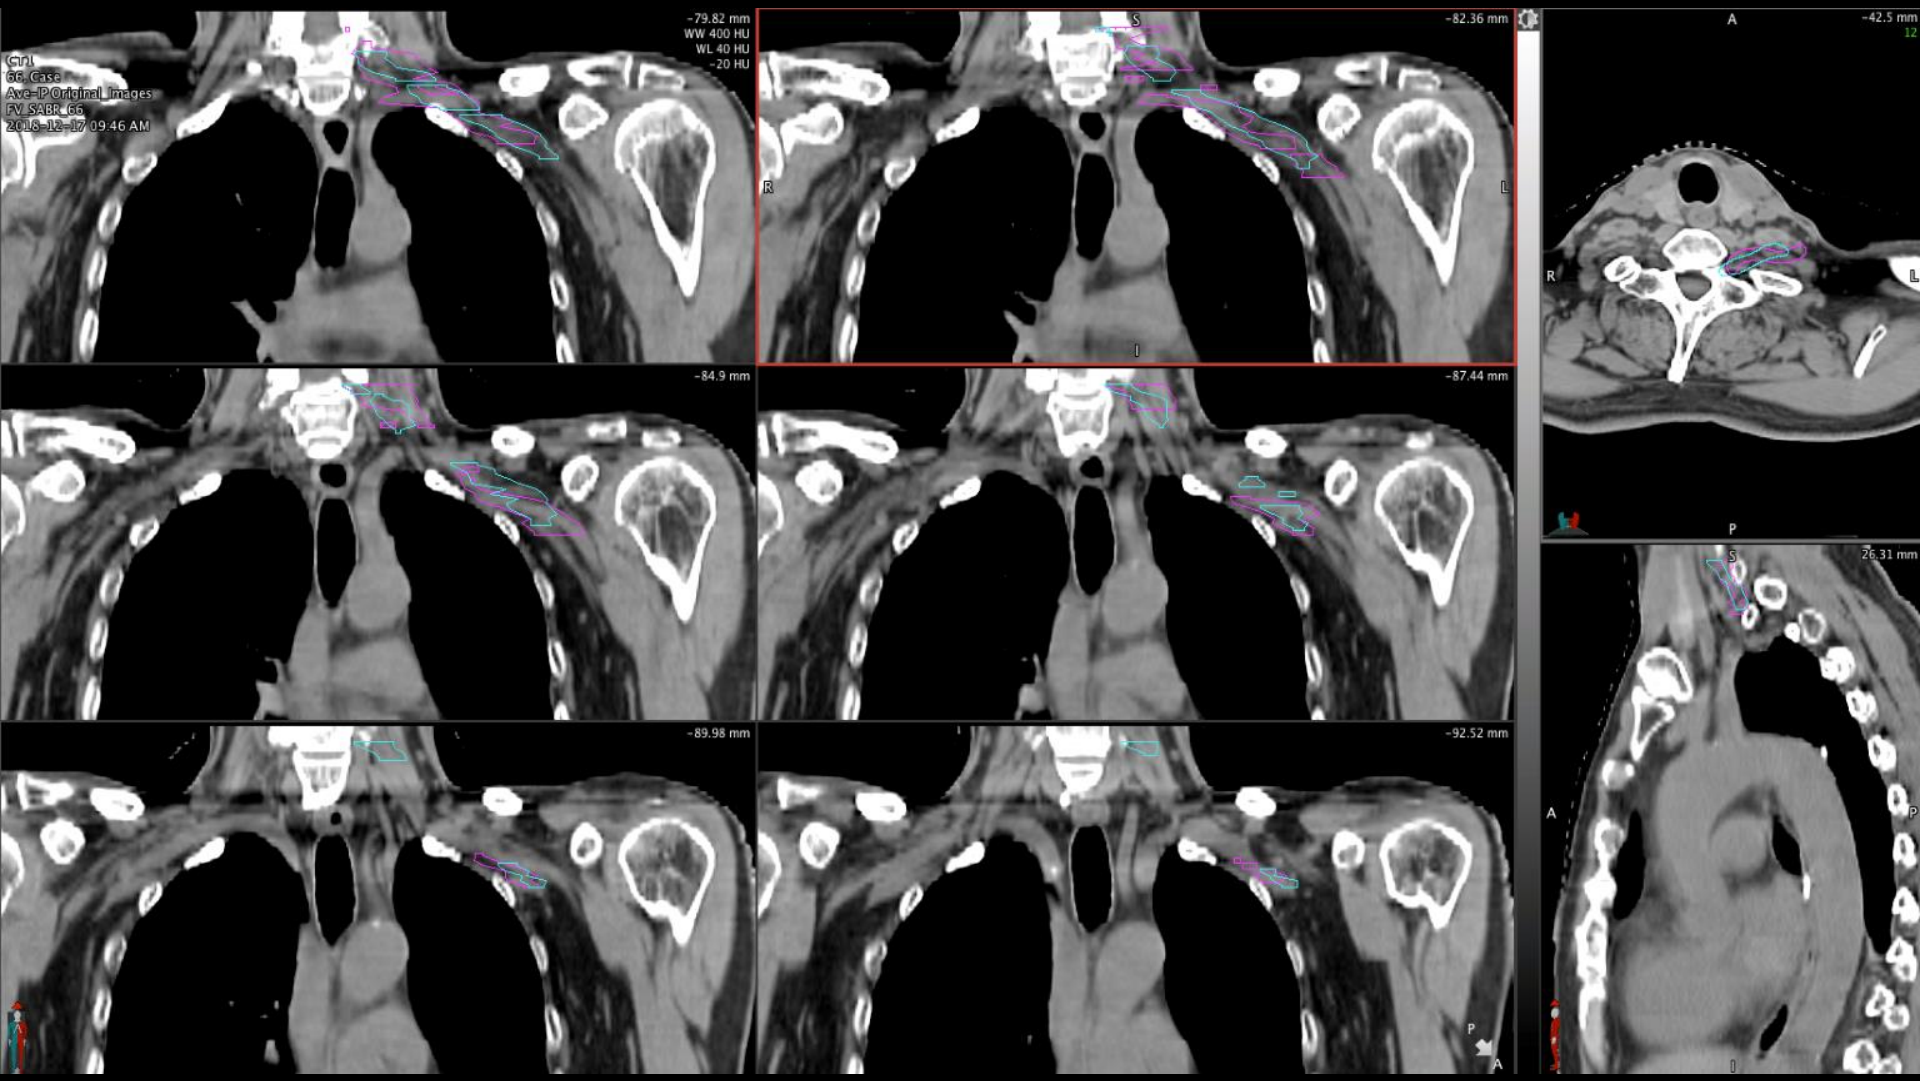

Brachial Plexus – 95% HD 6.04mm, DSC 0.53 (sup and inf borders cropped to same planes before comparison)

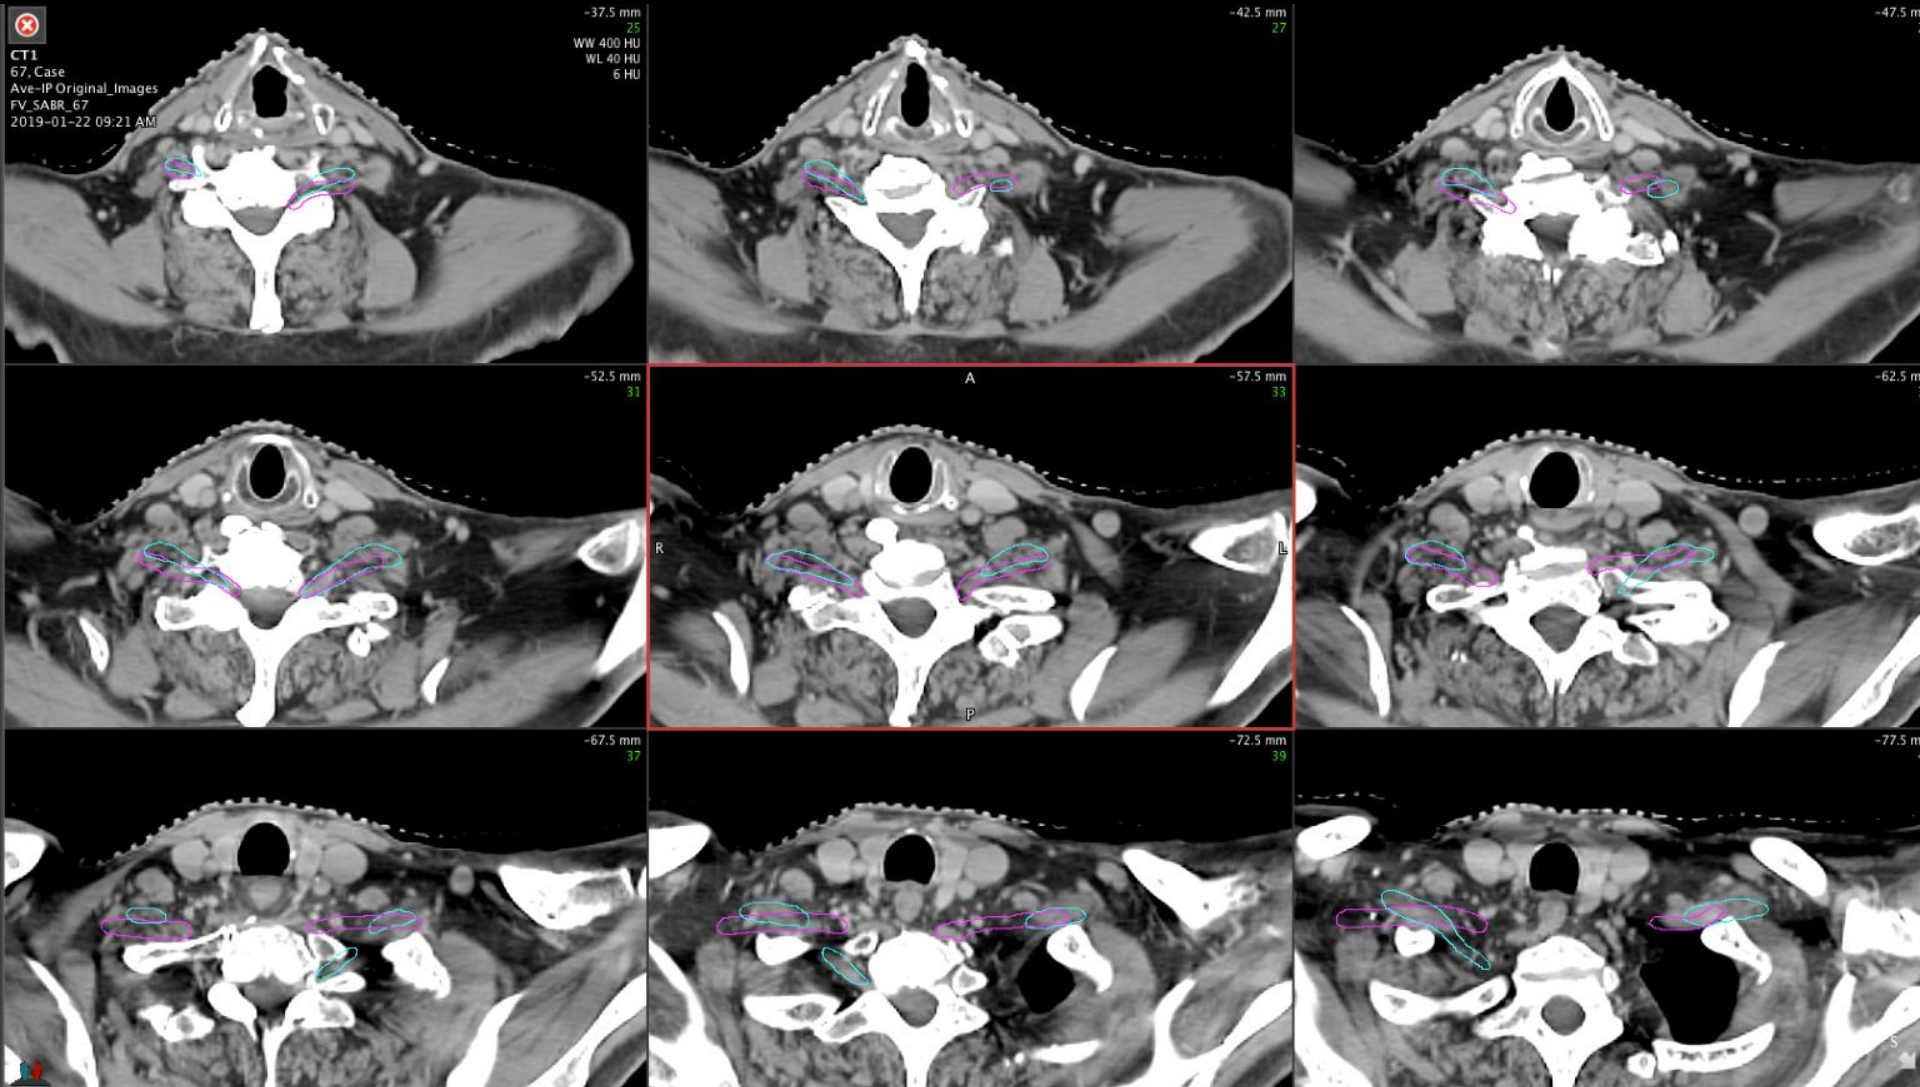

Brachial Plexus left – 95% HD 10.25mm, DSC 0.43 (sup and inf borders cropped to same planes before comparison)  
 Brachial Plexus right – 95% HD 10.43mm, DSC 0.39 (sup and inf borders cropped to same planes before comparison)

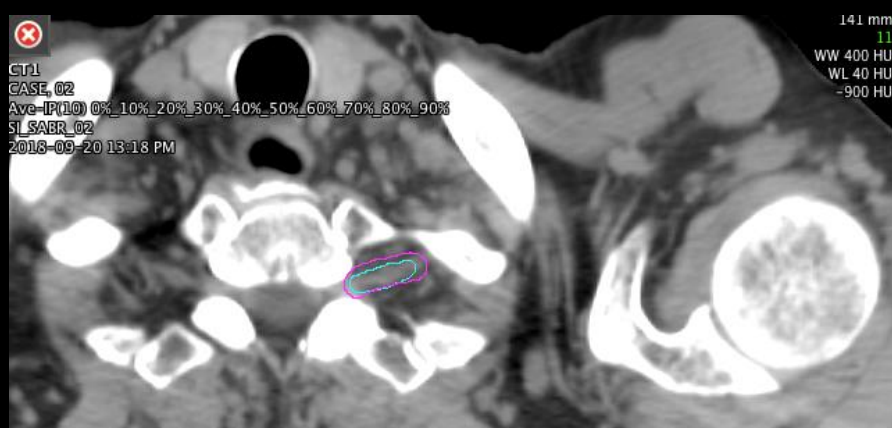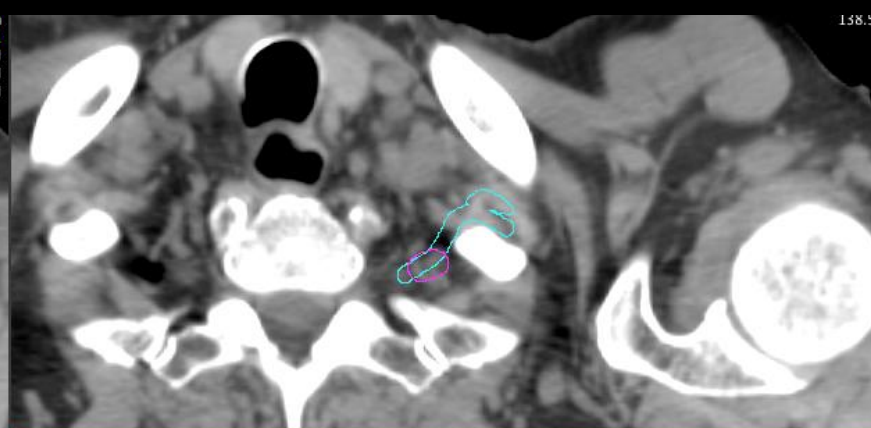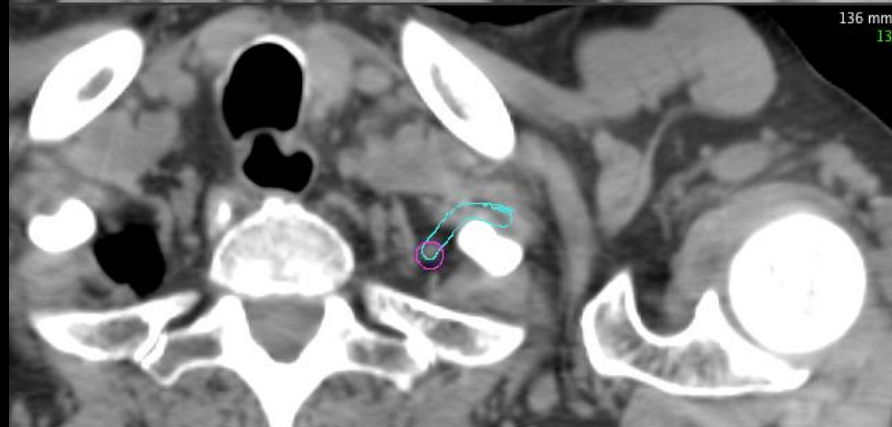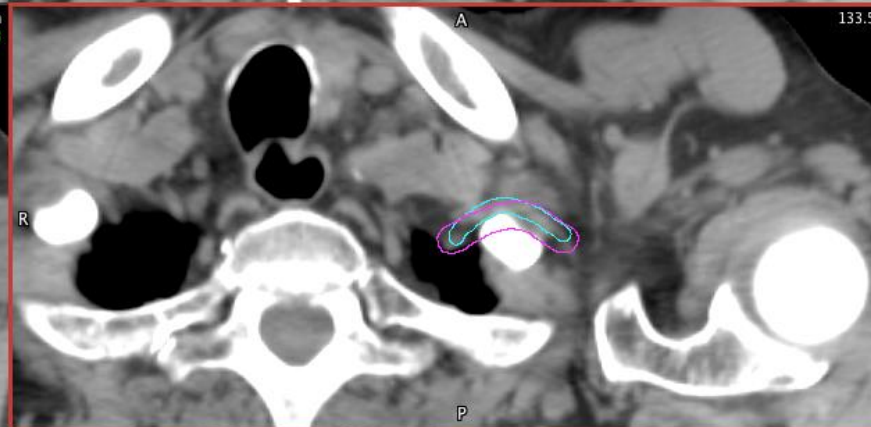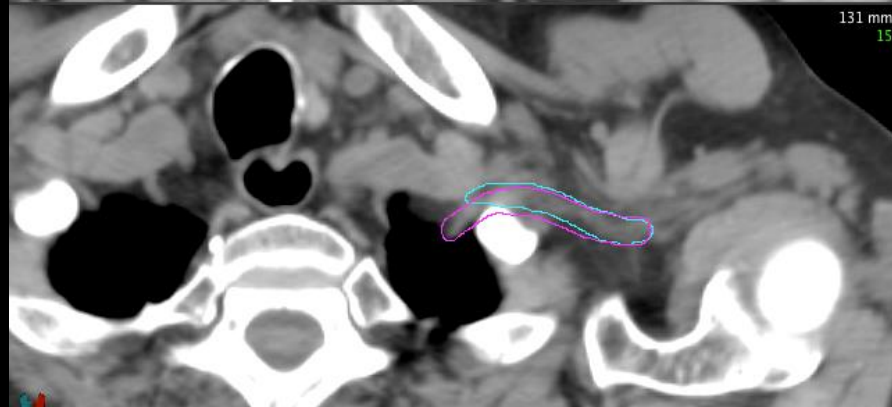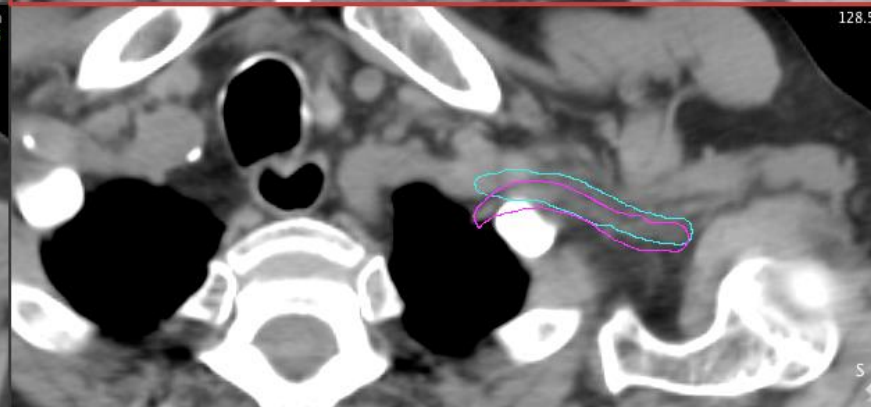

Brachial Plexus – 95% HD 4.45mm, DSC 0.68 (sup and inf borders cropped to same planes before comparison)



CT1  
56, Case  
Ave-IP Original\_Images  
FV\_SABR\_56  
Sep. 10, 2018 15:00:53

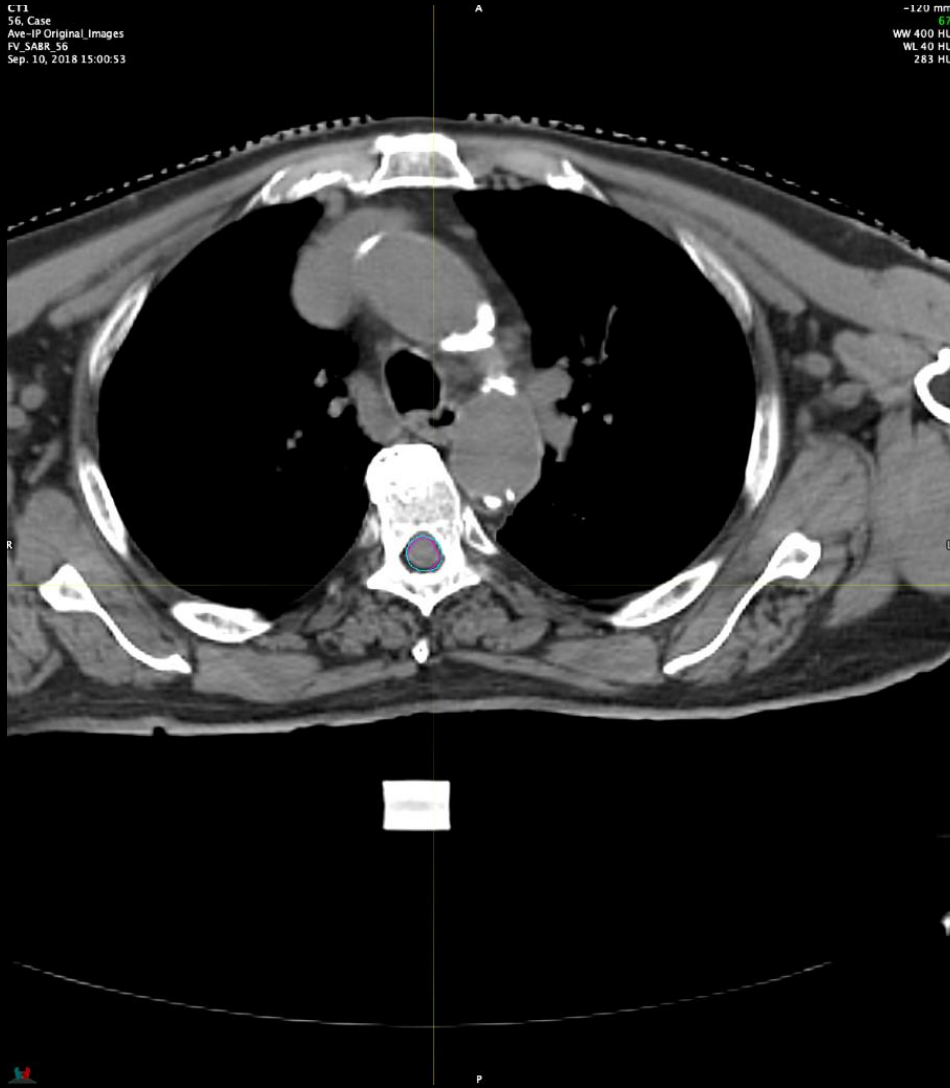

-120 mm  
77  
WW 400 HU  
WL 40 HU  
283 HU

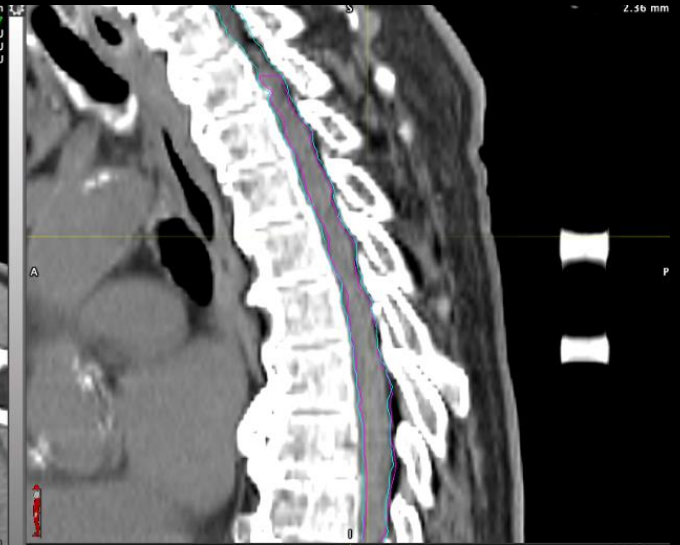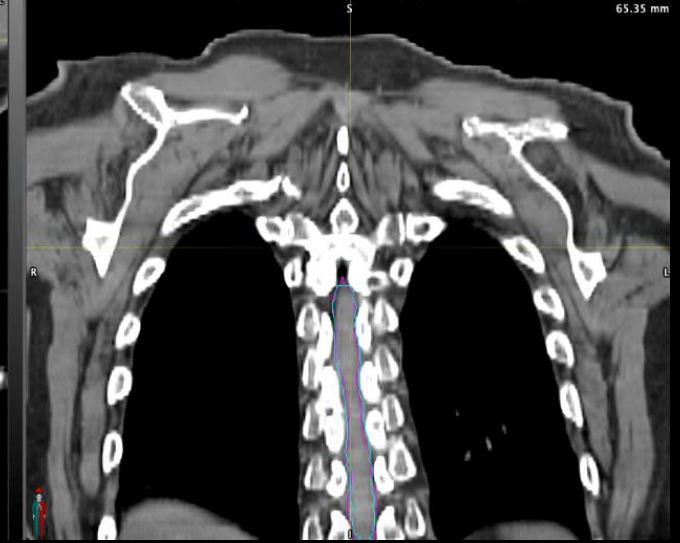

Spinal Cord – 95% HD 2.10mm, DSC 0.74 (sup and inf borders cropped to same planes before comparison)

CT1  
92, Case  
HELICAL  
FV\_SABR\_92  
Jul\_12\_2016 12:22:39

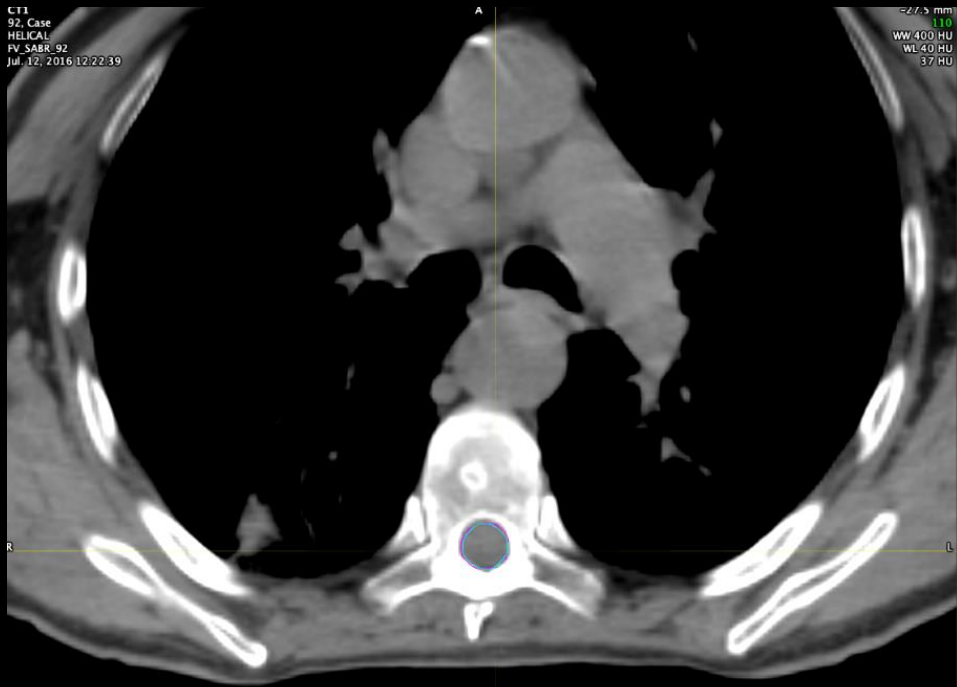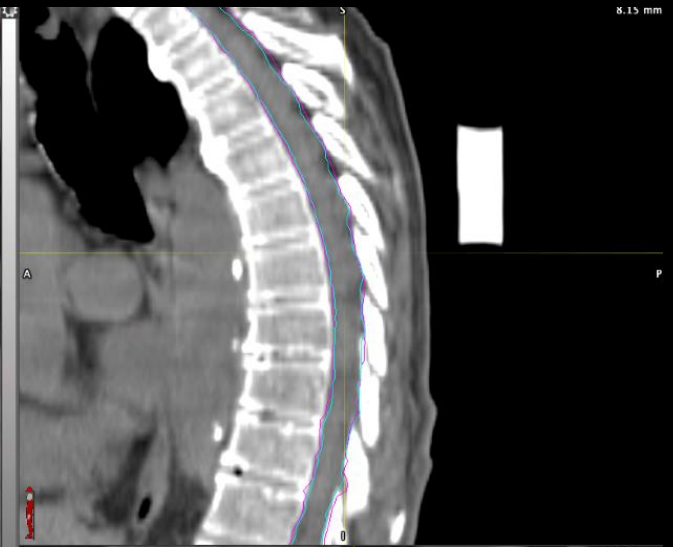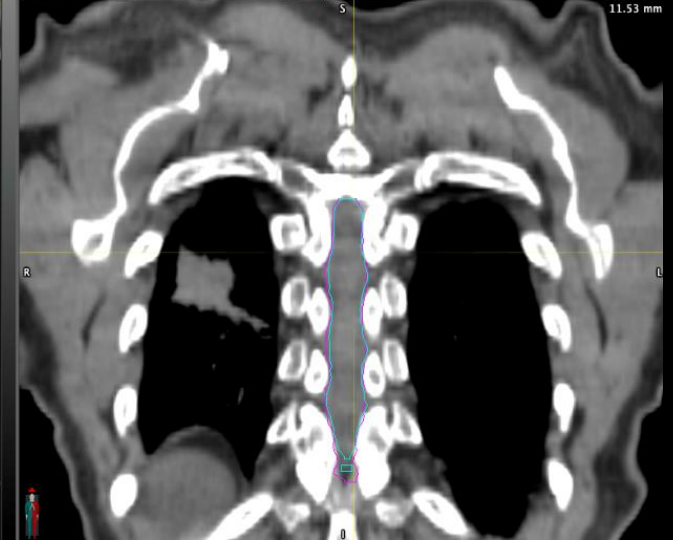

Spinal Cord – 95% HD 0.64mm, DSC 0.98 (sup and inf borders cropped to same planes before comparison)

CT1  
CASE: 30  
Ave-IP(L) 0%\_10%\_20%\_30%\_40%\_50%\_60%\_70%\_80%\_90%  
SI\_SABR\_30  
Aug. 14, 2017 13:31:02

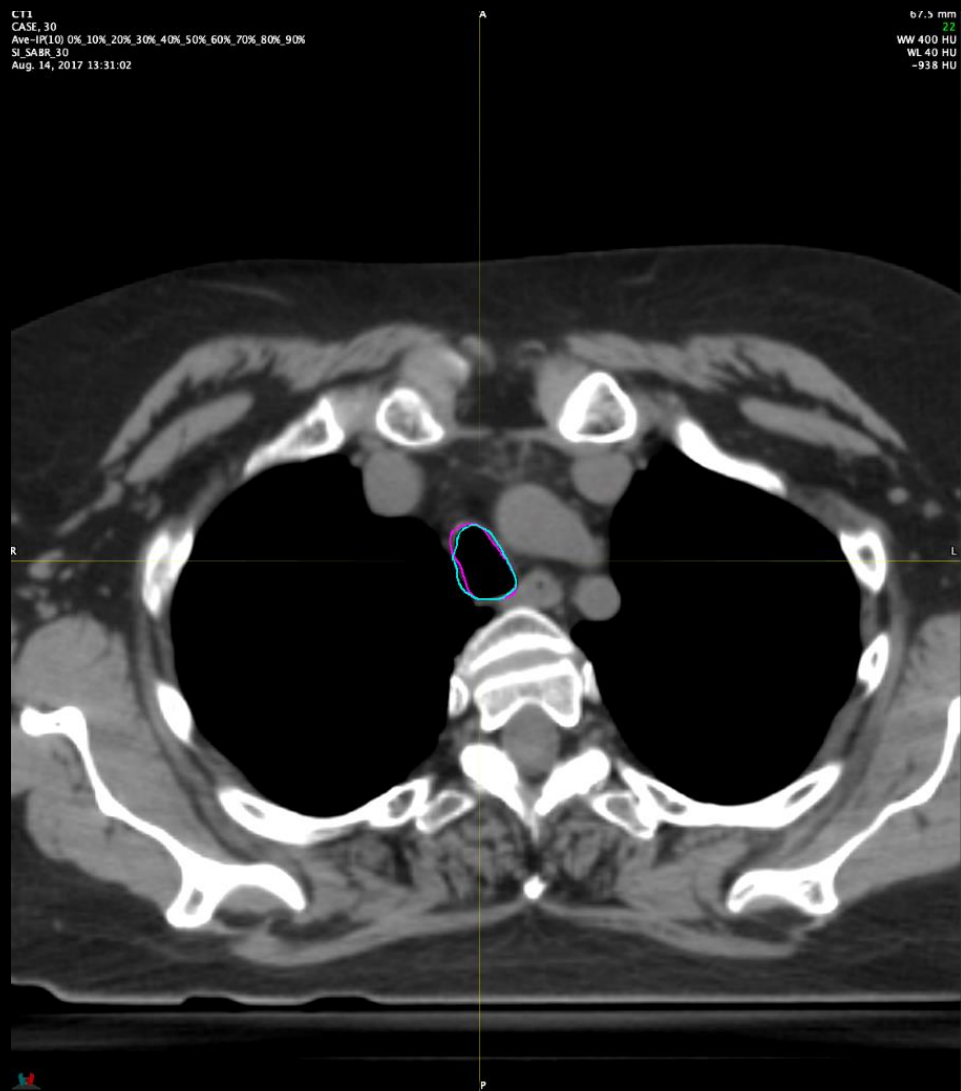

67.5 mm  
72  
WW 400 HU  
WL 40 HU  
-938 HU

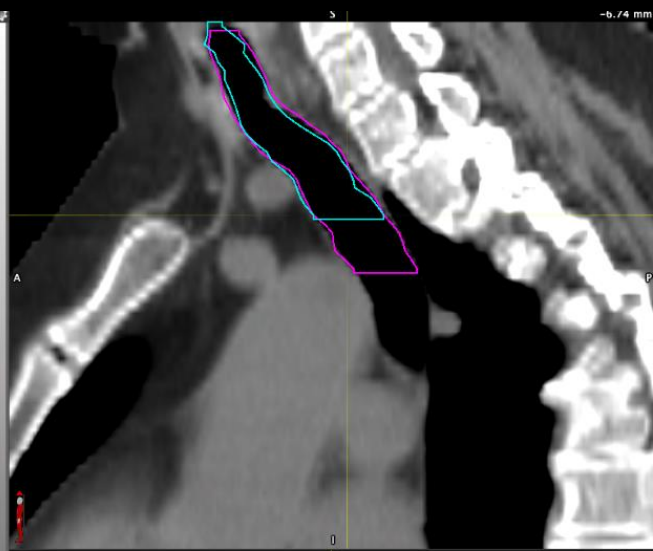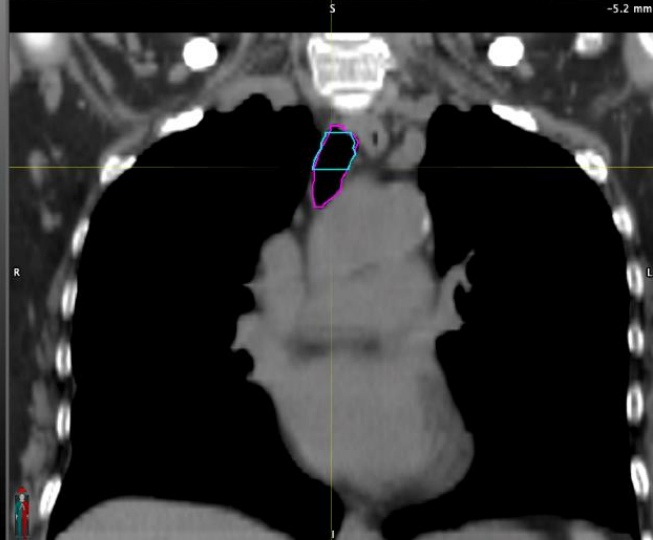

Trachea – 95% HD 7.85mm, DSC 0.79 (inf borders cropped to same planes before comparison)

C11  
67, Case  
Ave-IP Original\_Images  
FV\_SABR\_67  
Jan. 22, 2019 09:21:47

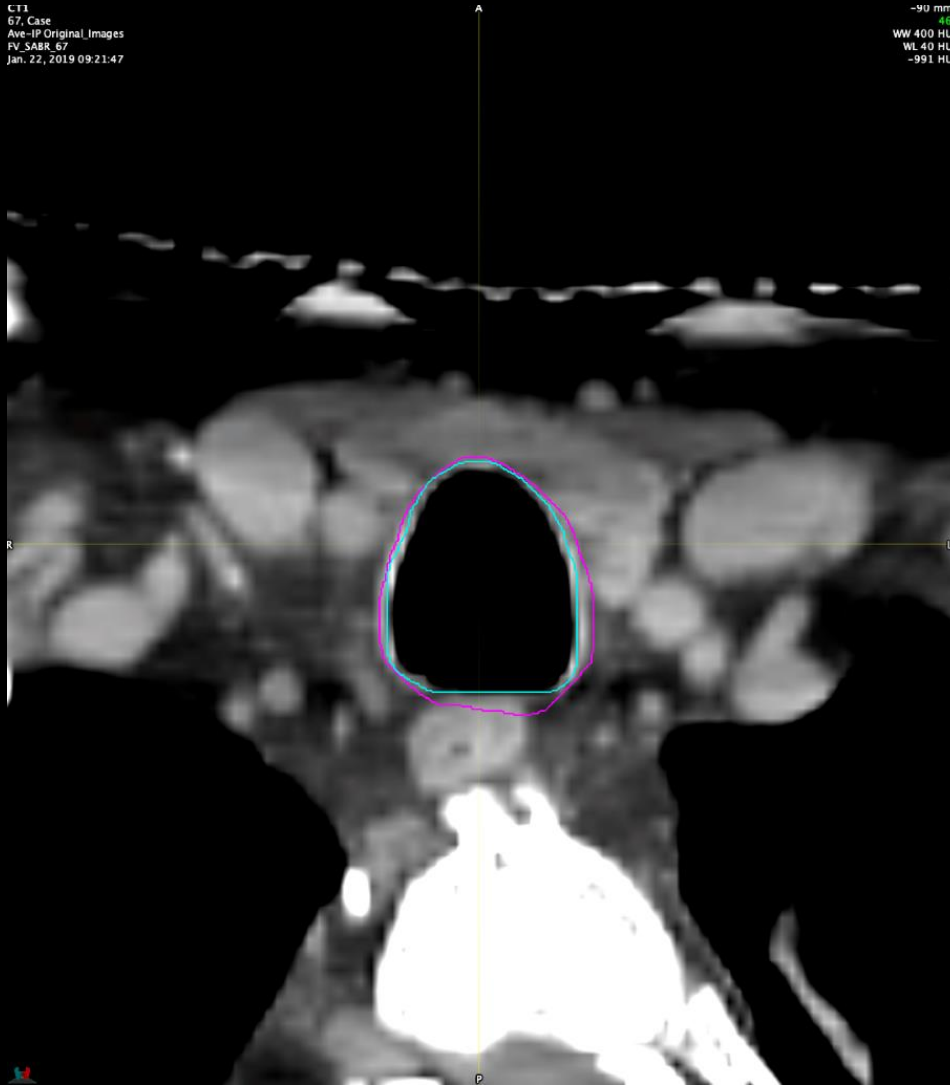

-90 mm  
96  
WW 400 HU  
WL 40 HU  
-991 HU

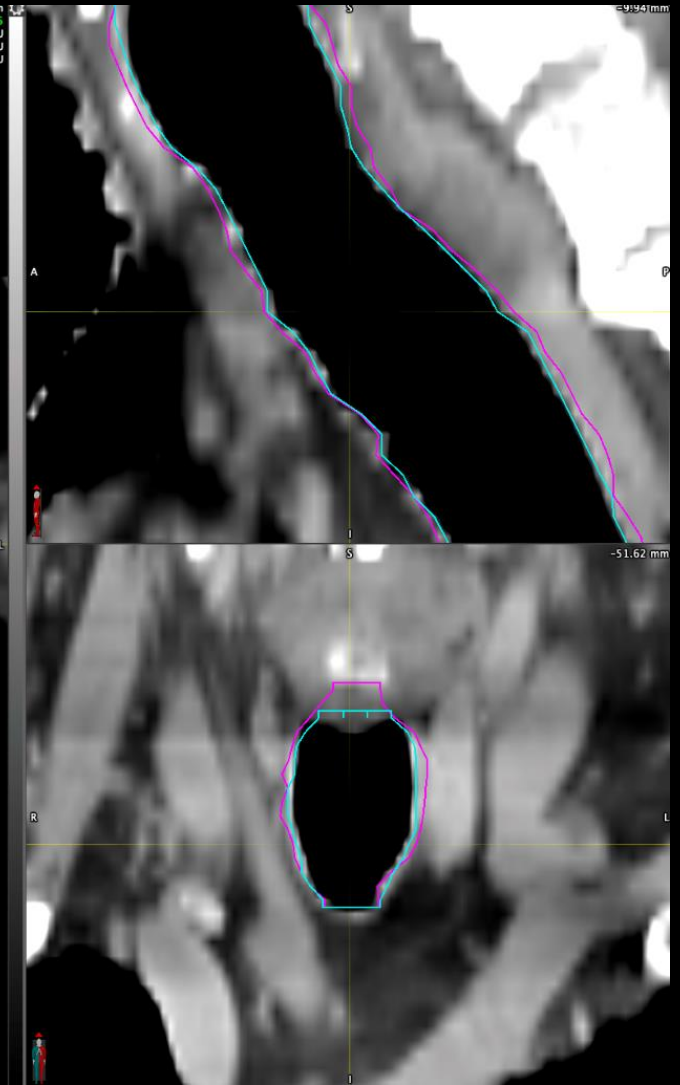

Trachea – 95% HD 3.25mm, DSC 0.98 (inf borders cropped to same planes before comparison)
